# Supplementary material for: Digit regeneration in mice is stimulated by sequential treatment with FGF2 and BMP2
Source: Research Square preprint supplement (doi:10.21203/rs.3.rs-6762312/v1), 2025-06-11
Supplement: Supplementary file 1 [file 07ca589a1806a58849939c98.xlsx]

## Sheet: All_genes
gene	log2FC	FGF2	BSA	FGF2 (%)	BSA (%)	Adjusted P value
Chrna1	6.62743	0.315948	0.00319565	0.332193	0.00446661	0
Ptpn22	6.16577	0.205284	0.00285939	0.250665	0.00357329	0
Nppc	6.1633	0.177063	0.00247053	0.168472	0.00260552	0
Etv4	5.77955	0.256078	0.0046618	0.337609	0.00558327	0
Hmga1b	5.74186	0.188784	0.00352772	0.287248	0.00498772	0
Upp1	5.35718	0.387574	0.00945543	0.385405	0.0107943	0
Kctd4	5.21891	0.129292	0.00347153	0.188807	0.00454106	0
Hmga1	5.18688	1.3106	0.03598	0.882744	0.0442195	0
Tslp	5.1093	1.3589	0.0393674	0.785823	0.0463039	0
Esm1	5.01686	0.549025	0.0169576	0.397853	0.014442	0
Lgr6	4.73703	0.0897615	0.0033659	0.126283	0.00498772	0
S100a8	4.73086	0.769731	0.0289873	0.534873	0.0323085	0
Dusp6	4.72957	0.832027	0.0313614	0.768624	0.036254	0
Trbc2	4.69547	0.177442	0.00684827	0.171323	0.00796546	0
Il18rap	4.59089	0.127044	0.0052718	0.191087	0.00699769	0
Serpinb2	4.5631	0.0598455	0.00253163	0.0667997	0.00238219	2.57913e-180
Frzb	4.5279	0.257663	0.0111691	0.286393	0.0134743	0
Kcnn4	4.4926	0.406203	0.0180441	0.453345	0.0229286	0
Sema7a	4.48826	0.150568	0.00670863	0.177499	0.00841212	0
Entpd1	4.48332	0.111185	0.00497088	0.130179	0.00588104	0
Unc13c	4.48013	0.364626	0.0163379	0.432725	0.0188342	0
Krt18	4.4686	0.0459627	0.00207597	0.0381034	0.00193553	1.35389e-97
Fosl1	4.29932	0.842073	0.0427686	0.779266	0.0509194	0
Spry4	4.19034	0.621389	0.0340364	0.611365	0.0387851	0
Itga6	4.11247	1.0947	0.0632873	0.789434	0.0757091	0
Ptgs2	4.11034	0.178945	0.0103606	0.198594	0.0110176	0
Gprc5a	4.09986	0.333624	0.019457	0.386925	0.0262041	0
Lbhd2	4.09089	0.118165	0.00693441	0.139111	0.00826323	0
Nrcam	4.05483	0.234319	0.0140988	0.255416	0.0175687	0
Camk1d	3.91798	0.412384	0.0272817	0.477955	0.0332763	0
Adam8	3.86793	0.750176	0.0513806	0.669707	0.0620859	0
Cxcl10	3.84776	0.0569651	0.00395656	0.0425694	0.00297774	2.30272e-102
Clic5	3.75198	0.0893489	0.0066318	0.115355	0.00863545	1.14277e-279
Prkcb	3.65072	0.265178	0.0211136	0.270049	0.0250875	0
Erich2	3.64785	0.234006	0.0186687	0.332383	0.0244175	0
Slco2a1	3.64297	1.34164	0.107397	0.828297	0.113601	0
Plaur	3.62164	0.465814	0.0378434	0.520715	0.0463783	0
Notum	3.53206	0.158484	0.0137003	0.207716	0.0165265	0
Nes	3.52149	0.273369	0.0238054	0.299601	0.0244919	0
E2f8	3.49903	0.220294	0.0194845	0.275466	0.0235986	0
Nxph3	3.42684	0.125765	0.0116944	0.167237	0.0134743	0
Arhgap22	3.40142	0.609594	0.0576913	0.649848	0.0712425	0
Prkg2	3.3502	1.33136	0.130553	0.845591	0.137869	0
Nav2	3.27766	0.627354	0.0646903	0.582478	0.0762302	0
Tinagl1	3.21732	0.597963	0.0642933	0.500285	0.0664781	0
Mcpt8	3.20151	0.534542	0.0581073	0.359844	0.0538227	0
Prl2c3	3.2002	0.0735797	0.00800576	0.0797225	0.00885878	4.21679e-169
Cck	3.19364	1.05629	0.115453	0.528981	0.0947666	0
Nptx1	3.12173	0.280602	0.0322372	0.256651	0.0315641	0
Slc14a1	3.11712	0.921471	0.106203	0.628943	0.0999032	0
Parvb	3.04632	0.396285	0.0479704	0.498765	0.0582893	0
Slc16a11	2.98745	0.162475	0.0204868	0.170468	0.0251619	0
S100a7a	2.95862	0.151653	0.0195083	0.183105	0.0235242	0
Eva1c	2.95458	0.24206	0.0312253	0.310148	0.0353607	0
Aldh1a3	2.94336	0.0818584	0.010642	0.0973964	0.0114643	5.20403e-203
Ramp3	2.89109	0.277183	0.0373647	0.323356	0.0431028	0
Plk3	2.8821	0.135169	0.0183349	0.209521	0.0230031	0
Neto2	2.87699	0.656517	0.0893689	0.551786	0.0999032	0
Rin1	2.87456	0.311834	0.0425202	0.423983	0.0542693	0
Anln	2.86538	0.416967	0.0572185	0.320981	0.0458572	0
AA467197	2.76659	0.187085	0.0274925	0.231851	0.0344674	0
Hmga2	2.75901	2.78117	0.410849	0.988788	0.389861	0
Itga4	2.75255	0.148632	0.0220553	0.168282	0.0228542	0
Akr1c18	2.75164	0.129844	0.0192796	0.127803	0.0175687	7.58141e-253
Itgb2	2.74984	0.0961861	0.0142998	0.150418	0.0179409	0
Tmem200a	2.74974	0.220887	0.0328409	0.269574	0.0371473	0
Etv1	2.74554	0.991646	0.147866	0.827347	0.164669	0
Ptgir	2.74296	0.308077	0.0460198	0.361174	0.0515149	0
Pidd1	2.74223	0.150912	0.0225544	0.222349	0.0281397	0
Abcb1a	2.73144	0.177288	0.0266953	0.265393	0.0348396	0
Itgb7	2.72696	0.0992282	0.0149878	0.146997	0.0206209	1.87005e-289
Prl2c2	2.72618	0.068224	0.0103104	0.0657545	0.0104965	1.80802e-118
Plk1	2.72151	0.239884	0.0363701	0.209521	0.0291819	0
Cep55	2.72093	0.112819	0.0171121	0.139586	0.0185364	5.06371e-281
Myzap	2.71293	0.209683	0.0319809	0.266724	0.0383384	0
Adora2b	2.70395	0.15705	0.0241029	0.220734	0.0302241	0
Nek2	2.68927	0.0896759	0.0139035	0.120772	0.0156331	2.17401e-243
Kif2c	2.67654	0.159468	0.0249432	0.165526	0.0241941	0
Tmem51	2.66718	0.100134	0.0157645	0.144052	0.0192809	3.09255e-288
Ccnb1	2.62771	0.327343	0.0529645	0.24924	0.0413162	0
Apcdd1	2.62045	0.158866	0.0258344	0.20344	0.027693	0
Errfi1	2.6171	1.37105	0.223475	0.856899	0.213876	0
Itgb3	2.58242	0.210232	0.0351004	0.276511	0.0418373	0
Il11	2.57696	0.234181	0.0392473	0.279171	0.0452617	0
Hmmr	2.5699	0.408176	0.0687433	0.257317	0.0434006	0
Iqgap3	2.56583	0.0826048	0.0139513	0.117636	0.0160054	3.84132e-231
Ccl2	2.55265	1.57116	0.26779	0.784113	0.191618	0
Ube2c	2.55123	0.679144	0.115869	0.399278	0.0752624	0
Sgms2	2.54164	0.508285	0.0872965	0.537438	0.108315	0
Spag5	2.53938	0.0962269	0.0165526	0.135405	0.0208442	2.17062e-253
Sh3bgrl2	2.53783	0.119434	0.0205667	0.183105	0.0266508	0
Cdc25c	2.53208	0.106529	0.0184178	0.13797	0.0214397	1.86076e-257
Plau	2.5194	0.10417	0.0181689	0.144147	0.0241197	1.82551e-259
Bub1b	2.50025	0.16415	0.0290128	0.177214	0.0272463	0
Phlda1	2.49958	0.958873	0.169555	0.776796	0.172188	0
Trpm6	2.49599	0.127124	0.022535	0.18016	0.0292563	0
Aspm	2.49544	0.171091	0.0303407	0.161821	0.0241197	0
Tbc1d2	2.4739	0.219638	0.0395356	0.318415	0.0489094	0
Nuf2	2.46747	0.222335	0.0401998	0.214747	0.0346162	0
Asf1b	2.45705	0.160518	0.0292333	0.191657	0.0311174	0
Knl1	2.45623	0.207974	0.0378974	0.188902	0.0316385	0
Mki67	2.45175	0.380106	0.069479	0.237742	0.0435495	0
Gtse1	2.45079	0.31324	0.0572949	0.388921	0.0682647	0
Tcim	2.44765	0.306033	0.0560987	0.316135	0.0562793	0
Ect2	2.44384	0.149976	0.0275646	0.174933	0.0296285	0
Dusp5	2.43802	0.2379	0.0439013	0.303402	0.0508449	0
Cenpf	2.43108	0.463313	0.0859105	0.268529	0.0502494	0
Kif11	2.42786	0.197133	0.0366353	0.18377	0.0329785	0
Pbk	2.42782	0.254293	0.0472593	0.210186	0.0345418	0
Kif23	2.41941	0.190218	0.0355578	0.18263	0.0288841	0
Spred3	2.41508	0.302156	0.0566525	0.414671	0.0686369	0
Ndc80	2.41085	0.184549	0.0347036	0.194318	0.0320107	0
Bub1	2.41069	0.13221	0.0248642	0.16011	0.0262041	7.61171e-293
Dlgap5	2.4064	0.197998	0.0373474	0.200209	0.036924	0
Ccnf	2.39563	0.168635	0.0320473	0.211422	0.0360307	0
Cenpe	2.39105	0.34954	0.0666374	0.24924	0.0508449	0
Fam78b	2.38395	0.231268	0.0443074	0.305207	0.054046	0
Syngr1	2.37505	0.101283	0.0195244	0.13816	0.0242686	2.75021e-240
Nusap1	2.3729	0.312902	0.0604077	0.214082	0.0387851	0
Cit	2.36816	0.136155	0.0263722	0.164386	0.029703	8.38885e-286
Cenpi	2.36553	0.0926044	0.0179695	0.136735	0.0221842	3.23819e-247
Ncapg	2.36189	0.180262	0.0350674	0.190137	0.0363284	0
Birc5	2.35579	0.522866	0.102148	0.321931	0.0696791	0
Chst1	2.35542	0.238706	0.0466456	0.297605	0.0551627	0
Ercc6l	2.35144	0.101214	0.0198331	0.139396	0.0233008	1.52161e-248
Spink2	2.35105	0.135847	0.0266266	0.195363	0.0325318	0
Kif4	2.34287	0.145303	0.0286418	0.167807	0.027693	2.51562e-305
Mtcl1	2.34058	0.117568	0.0232117	0.180635	0.0288841	0
Gsdme	2.33567	0.263901	0.0522798	0.364025	0.0622348	0
Ccna2	2.33511	0.259737	0.0514748	0.2252	0.0401995	0
Aurka	2.32751	0.178717	0.0356053	0.189662	0.0353607	0
Uhrf1	2.32576	0.144903	0.0289037	0.186431	0.0320107	0
Cdca2	2.32408	0.150143	0.029984	0.173508	0.0307452	2.61755e-305
Prc1	2.3177	0.498774	0.100048	0.312809	0.0667759	0
Pbld1	2.31049	0.251621	0.0507249	0.310908	0.0561304	0
Ttk	2.30223	0.105183	0.0213257	0.144052	0.0258319	5.65684e-248
Cldn15	2.2997	0.0992869	0.0201658	0.123907	0.0241197	4.3267e-201
Tm4sf1	2.29622	3.10631	0.632432	0.995059	0.52237	0
Ccnb2	2.29136	0.338265	0.0691018	0.255036	0.0471972	0
Mybl1	2.28733	0.21374	0.0437853	0.276606	0.051366	0
Pclaf	2.28424	0.476998	0.0979245	0.278696	0.0530782	0
Rrm2	2.28164	0.488535	0.100474	0.385215	0.0908956	0
Mfsd6	2.28097	0.151637	0.0312006	0.201824	0.038934	0
Depdc1a	2.27546	0.124091	0.0256306	0.148803	0.0245664	7.70468e-268
Esco2	2.26647	0.177575	0.0369069	0.170277	0.0308196	4.50665e-295
Prr11	2.25501	0.0914648	0.0191614	0.127328	0.0233753	8.03967e-214
Aif1l	2.25026	0.389551	0.081878	0.464652	0.0987866	0
Eml5	2.24989	0.229254	0.0481985	0.280312	0.0531527	0
Prrg4	2.2475	0.108943	0.0229421	0.151273	0.0273952	4.13066e-258
Cd80	2.24646	0.261719	0.0551549	0.355283	0.0645425	0
Kif20a	2.2457	0.232689	0.0490628	0.225295	0.0430284	0
Sgo2a	2.24113	0.227067	0.0480294	0.214747	0.0453361	0
Kifc1	2.23176	0.189056	0.0402498	0.242208	0.0451128	0
Iqgap2	2.23173	0.123132	0.0262152	0.167807	0.029703	1.52642e-291
Ddias	2.22077	0.214225	0.0459568	0.284398	0.0554604	0
Cdc20	2.21873	0.356038	0.076488	0.288864	0.0647659	0
Mis18bp1	2.20264	0.139146	0.0302282	0.163341	0.0316385	5.78909e-270
Cenpa	2.19501	0.469203	0.10247	0.326112	0.0782402	0
Slc25a37	2.19415	0.629044	0.13746	0.667807	0.161915	0
Kif15	2.19383	0.133169	0.0291068	0.155074	0.0291819	1.7377e-259
Igsf9b	2.18681	0.171078	0.0375751	0.235842	0.0457083	0
Dnph1	2.17399	0.100978	0.0223764	0.156784	0.0281397	4.06504e-268
Pimreg	2.17189	0.180337	0.0400204	0.191467	0.0393806	0
Ncaph	2.16403	0.156506	0.0349215	0.193938	0.038264	0
Diaph3	2.15844	0.340463	0.0762633	0.339605	0.0750391	0
Knstrn	2.15296	0.248564	0.0558897	0.239358	0.0511427	0
Gldn	2.1515	0.58279	0.131173	0.411155	0.126554	0
Melk	2.14576	0.139695	0.0315677	0.166857	0.0332763	7.96723e-271
Itgb4	2.1392	0.202469	0.0459617	0.244299	0.055386	0
Ska1	2.13472	0.0949116	0.0216125	0.127803	0.0227797	1.42317e-217
Cdca3	2.13283	0.354129	0.0807451	0.267484	0.0597037	0
Shcbp1	2.13174	0.136132	0.0310627	0.163626	0.0319363	3.05295e-268
Nav3	2.12926	0.249376	0.0570011	0.317655	0.0652125	0
Fez1	2.12028	1.0015	0.230347	0.803022	0.237922	0
Tes	2.11994	0.56461	0.129892	0.607564	0.142187	0
Slc16a1	2.11569	1.3177	0.304041	0.86336	0.302762	0
Tpx2	2.11064	0.45974	0.10645	0.314519	0.0806968	0
Sgo1	2.10957	0.155685	0.0360747	0.174268	0.0364773	6.15092e-275
Aurkb	2.10142	0.183932	0.0428614	0.193177	0.0415395	1.56703e-302
Abcb1b	2.09473	0.379842	0.0889253	0.47881	0.10906	0
Epha2	2.08336	0.162633	0.0383756	0.242588	0.0475694	0
Spdl1	2.08103	0.166081	0.0392525	0.20268	0.0434006	0
Ckap2	2.08	0.510325	0.120699	0.403459	0.102062	0
Klk8	2.07458	0.0871274	0.0206845	0.0973014	0.0231519	8.74823e-135
Foxl1	2.06736	0.148324	0.0353895	0.219688	0.0460805	0
Cystm1	2.06537	0.243939	0.0582831	0.307488	0.0723591	0
Mthfd1l	2.06494	0.184556	0.044108	0.27385	0.0550882	0
Gch1	2.05734	0.428982	0.103066	0.487172	0.12246	0
Ank	2.04997	1.04027	0.251215	0.801311	0.272017	0
Tk1	2.04757	0.318326	0.0770003	0.261878	0.0657336	0
Ccne2	2.04264	0.0824417	0.0200102	0.0932155	0.0202486	3.47225e-138
Met	2.04088	0.128845	0.0313113	0.195268	0.0393806	0
Mcm5	2.03727	0.208552	0.0508081	0.247054	0.0552371	0
Ckap2l	2.03377	0.218262	0.0533032	0.20401	0.0425073	0
Lmo2	2.03351	0.110592	0.0270132	0.131034	0.0302241	1.77064e-187
Cenph	2.03329	0.191842	0.0468664	0.22824	0.0500261	0
Cyp2f2	2.03077	0.368572	0.0901985	0.271475	0.078389	0
Plcg2	2.02903	0.105193	0.0257745	0.157545	0.0320852	4.36957e-248
Dusp10	2.02701	0.153043	0.037551	0.217123	0.0453361	0
Kif20b	2.02676	0.223611	0.0548754	0.208096	0.051366	5.30877e-298
Brca1	2.02655	0.0874009	0.0214517	0.126378	0.0257575	6.89043e-197
Ptprn	2.01919	0.498003	0.122856	0.548651	0.141219	0
Inka2	2.01659	0.380538	0.0940471	0.476815	0.108166	0
Rbm47	2.0116	0.09345	0.0231755	0.153554	0.0296285	1.63905e-248
Rsad2	2.0064	0.0694881	0.0172951	0.0558723	0.0179409	2.57863e-57
Osbpl3	2.00122	0.266328	0.0665256	0.363075	0.0805479	0
Pdzd2	1.99315	0.133951	0.0336472	0.195553	0.0417628	1.87968e-301
Aqp1	1.99215	0.93241	0.234374	0.673793	0.208889	0
Map3k6	1.99037	0.110239	0.0277443	0.169042	0.0352862	3.13293e-262
Ptchd4	1.98785	0.0789276	0.0198989	0.114405	0.0247897	6.32439e-170
Spred2	1.98164	0.336208	0.0851285	0.451159	0.100648	0
Flrt1	1.98049	0.277992	0.070444	0.354618	0.0794313	0
Ereg	1.96803	0.68643	0.175453	0.63512	0.175761	0
Cdca8	1.96454	0.347878	0.0891336	0.301216	0.0841212	0
Lockd	1.96135	0.17999	0.0462192	0.190517	0.044145	1.44922e-279
Klf10	1.95958	0.194592	0.0500301	0.280977	0.0588848	0
Foxm1	1.95682	0.109569	0.0282244	0.152319	0.034244	1.66564e-223
Ptk2b	1.95616	0.195444	0.0503685	0.282307	0.0604482	0
Arhgap11a	1.94671	0.230687	0.0598421	0.265868	0.0664036	0
Ptgs1	1.94472	0.668326	0.173608	0.639871	0.185737	0
Cx3cl1	1.94325	0.311523	0.0810054	0.387115	0.0921611	0
Cenpu	1.94317	0.0949558	0.0246927	0.142626	0.0305963	6.53919e-215
Tspan15	1.94302	0.21865	0.0568647	0.239073	0.069158	8.17601e-303
Lrp8	1.94224	0.24117	0.0627554	0.337799	0.0757835	0
Gas2l3	1.94203	0.129124	0.0336045	0.142721	0.0347651	2.74866e-197
Rapgef3	1.93997	0.0995371	0.0259415	0.157545	0.0328296	1.99289e-242
Trem2	1.93625	0.106076	0.0277172	0.135975	0.0325318	6.41788e-189
Trib2	1.93437	0.521531	0.136451	0.585519	0.15045	0
Ube2t	1.93098	0.145303	0.0381058	0.191277	0.0422095	4.69696e-288
Spc25	1.93098	0.42362	0.111095	0.380179	0.100722	0
Gen1	1.92914	0.10134	0.0266103	0.137495	0.0314896	9.59605e-198
Stn1	1.92887	0.7598	0.19955	0.719403	0.225713	0
Trip13	1.92735	0.119802	0.0314972	0.166097	0.0364773	4.57986e-248
Ccdc3	1.92721	0.331193	0.0870826	0.348822	0.0932777	0
Fjx1	1.92057	0.261109	0.0689718	0.322216	0.0774957	0
Chic1	1.91647	0.530931	0.140644	0.552452	0.162361	0
Dio2	1.91644	0.128794	0.0341185	0.15935	0.0359562	7.57293e-234
Cyb561	1.90946	0.259548	0.0690896	0.330863	0.0757091	0
C77080	1.90877	0.257031	0.0684521	0.361935	0.0850145	0
Hectd2	1.89499	0.109995	0.0295751	0.177024	0.0364773	1.91985e-274
Il16	1.89165	0.302046	0.081401	0.370296	0.0882156	0
Rgmb	1.89038	0.784717	0.211667	0.740118	0.235316	0
Klf5	1.89007	0.389943	0.105204	0.457716	0.120822	0
Lipg	1.88933	0.199717	0.05391	0.231281	0.0640959	1.73212e-295
Tiam1	1.88795	0.167107	0.0451507	0.255321	0.0578426	0
Cdt1	1.8878	0.0974024	0.0263199	0.148233	0.0323829	3.90819e-220
Mastl	1.88547	0.16255	0.0439952	0.192037	0.0485372	2.24592e-262
Ulbp1	1.87954	0.112527	0.0305815	0.15935	0.0375195	4.79443e-225
Sytl1	1.86479	0.398874	0.109516	0.446123	0.118663	0
Pttg1	1.86307	0.410376	0.112809	0.335804	0.10102	0
Fam111a	1.85609	0.874409	0.241533	0.737172	0.242388	0
Pmaip1	1.85113	0.100025	0.0277244	0.125713	0.0302241	5.62121e-173
Perp	1.84172	0.378942	0.105721	0.335614	0.100573	0
Rad51	1.83915	0.175866	0.0491522	0.207811	0.0535993	1.16277e-280
Racgap1	1.83626	0.239799	0.067155	0.244869	0.0655848	0
Cdc25b	1.83271	0.215029	0.0603666	0.276321	0.0713169	0
Inf2	1.83002	1.13857	0.320235	0.905074	0.339463	0
Mfap3l	1.82522	0.20764	0.0585956	0.285443	0.0713913	0
Top2a	1.82164	0.578934	0.16378	0.356899	0.124395	0
Cenpm	1.81978	0.256577	0.0726789	0.244964	0.061267	0
Ermp1	1.8152	0.794319	0.225717	0.747815	0.240378	0
Eda2r	1.81161	0.309106	0.0880559	0.404314	0.102509	0
Rad51ap1	1.81099	0.130465	0.037182	0.162581	0.037594	7.08507e-233
Gmnn	1.81083	0.339024	0.0966308	0.357564	0.0999777	0
Zwilch	1.81018	0.111527	0.0318026	0.162296	0.0387106	8.66848e-226
Tor4a	1.80768	0.160355	0.0458054	0.249715	0.0562793	0
Ccnd1	1.80238	3.32627	0.953649	0.995914	0.65555	0
Cenpn	1.79957	0.11647	0.0334572	0.166857	0.040274	7.86192e-231
Brip1	1.7921	0.0864433	0.0249605	0.120582	0.0285119	6.171e-167
Kif22	1.7921	0.191392	0.0552649	0.236697	0.0617881	0
Tpd52	1.79175	0.337587	0.0975022	0.429114	0.11911	0
Gask1b	1.79043	0.442576	0.127943	0.503991	0.139061	0
Mxd3	1.7846	0.0978506	0.0284017	0.125048	0.0281397	2.69774e-180
Raph1	1.77397	0.617125	0.180449	0.629418	0.200476	0
Sgms1	1.77126	0.401884	0.117733	0.503231	0.137497	0
Cd34	1.76475	1.06581	0.313645	0.72596	0.249758	0
Tmem47	1.75702	0.616634	0.182436	0.621342	0.201519	0
Pole	1.74844	0.100792	0.0299982	0.152794	0.0372218	2.78118e-207
Mcub	1.73857	0.616739	0.184817	0.647377	0.210005	0
Dlgap1	1.73277	0.0870054	0.0261777	0.126188	0.030373	2.81705e-171
Fignl1	1.72346	0.100641	0.0304761	0.143672	0.0360307	6.93657e-190
Fbxo5	1.71068	0.1587	0.0484853	0.165146	0.0444428	3.7482e-209
Kif18a	1.70667	0.101768	0.0311784	0.144622	0.0373707	3.96354e-186
Schip1	1.70647	0.085344	0.0261501	0.13664	0.0323829	9.40777e-188
Nceh1	1.70464	0.624959	0.191736	0.639491	0.208814	0
Slc20a2	1.70136	0.475865	0.146327	0.562334	0.171295	0
Ncapd2	1.70081	0.133261	0.040993	0.177309	0.0463039	1.62786e-229
Mbnl3	1.69958	0.189112	0.0582229	0.259882	0.0695303	0
Tacc3	1.69852	0.278516	0.0858112	0.284493	0.0865034	0
Dok1	1.69272	0.676398	0.20924	0.681965	0.231147	0
Pi16	1.68796	0.546556	0.169632	0.434721	0.14777	0
Arap2	1.6816	0.204069	0.063616	0.272615	0.0748902	0
Tnfrsf12a	1.67864	1.39149	0.434667	0.88436	0.393881	0
Arl4c	1.6767	0.429045	0.134204	0.490783	0.155661	0
Stom	1.67649	0.616647	0.192914	0.661441	0.214323	0
Cd44	1.67382	1.12683	0.353176	0.879894	0.343706	0
Pakap	1.67206	1.12783	0.35392	0.876948	0.352192	0
Morrbid	1.66568	0.0840441	0.0264904	0.131319	0.0331274	4.4201e-171
Gss	1.66402	1.07679	0.33979	0.871912	0.358073	0
Gdf15	1.66309	0.226165	0.071414	0.217503	0.0701258	6.62987e-233
Ercc1	1.65698	2.1211	0.672605	0.979571	0.596814	0
Rassf3	1.65375	0.278434	0.0884902	0.380369	0.104519	0
Clspn	1.65133	0.188895	0.0601338	0.193177	0.057396	9.91345e-226
Bmp2	1.64004	0.410619	0.131746	0.367636	0.136306	0
Egr3	1.6389	0.123029	0.0395049	0.170087	0.0409439	7.26224e-233
Sema4b	1.63543	0.196519	0.0632542	0.288198	0.0764535	0
Chtf18	1.63019	0.088035	0.0284394	0.133219	0.036254	9.12488e-163
Vldlr	1.62415	0.546341	0.177234	0.586089	0.190278	0
Ubtd1	1.62381	0.846919	0.274805	0.815564	0.296583	0
Samd12	1.62291	0.153882	0.0499624	0.20458	0.0573215	3.11327e-249
Mgat5	1.61836	0.492923	0.160547	0.579628	0.187523	0
Ripk3	1.61806	0.668607	0.217814	0.699639	0.241718	0
Cip2a	1.60912	0.156962	0.0514518	0.200114	0.0577682	5.52596e-237
Rem1	1.60464	0.234506	0.0771098	0.303497	0.0911189	0
Gk	1.60372	0.140639	0.046274	0.216268	0.057396	5.63491e-275
Il6ra	1.60368	0.234991	0.0773204	0.313379	0.0882156	0
Kpna2	1.60347	0.210445	0.0692541	0.27309	0.0804735	0
Fam181b	1.59932	0.11401	0.0376271	0.148233	0.0429539	2.25104e-171
Spc24	1.58901	0.268507	0.0892516	0.256081	0.0778679	3.39531e-302
Mapk13	1.58679	1.38142	0.45989	0.898043	0.451351	0
Slc43a2	1.58375	0.188931	0.0630298	0.271	0.0779424	0
Nqo1	1.58005	0.32163	0.107576	0.394147	0.126926	0
Orai2	1.57998	0.291369	0.0974592	0.410775	0.114271	0
Hbegf	1.57798	0.621451	0.208155	0.511688	0.186779	0
Zfp365	1.57645	0.255522	0.0856778	0.345211	0.101839	0
Odc1	1.57629	1.37265	0.460309	0.859749	0.444428	0
S100a3	1.5753	0.0802974	0.0269456	0.128943	0.032904	5.22437e-165
Cdkn3	1.57314	0.227719	0.0765309	0.217503	0.0728058	2.59814e-227
Mdm2	1.56908	1.70797	0.575627	0.944223	0.517085	0
Pcgf5	1.56835	0.196389	0.066221	0.288769	0.0786124	0
Pla2g7	1.56644	0.398844	0.134666	0.397567	0.140177	0
Aox1	1.56523	0.159644	0.0539474	0.231946	0.0650636	1.03755e-280
Trim7	1.55853	0.306582	0.104084	0.372102	0.112782	0
Baiap2l1	1.55733	0.0873924	0.0296941	0.132459	0.0377429	1.40077e-153
Kank3	1.54993	0.214452	0.0732412	0.290099	0.0881411	0
Slc19a2	1.54405	0.243617	0.0835415	0.344356	0.0985632	0
Bcl2l1	1.54236	0.853856	0.293149	0.806157	0.316981	0
Clcf1	1.53694	0.189454	0.0652887	0.274135	0.078389	0
Gdf6	1.53119	0.0938171	0.03246	0.108609	0.0358073	8.82905e-108
Ass1	1.53063	1.72785	0.598055	0.940707	0.470632	0
Raet1e	1.5303	0.227849	0.0788824	0.308628	0.0945433	0
Osbpl6	1.52971	0.183619	0.0635962	0.253326	0.075858	4.52191e-290
Wnt10a	1.51766	0.180135	0.0629126	0.198974	0.0697536	1.06518e-192
Rbpj	1.51714	1.82105	0.636235	0.972159	0.566813	0
Eps8	1.51512	1.50226	0.525592	0.947073	0.46624	0
Rai14	1.51252	0.907577	0.318105	0.779932	0.334103	0
Cplx2	1.51191	0.11955	0.0419199	0.172083	0.0492072	2.5164e-200
Pxn	1.50722	0.661177	0.232594	0.698879	0.259212	0
Cldn11	1.50584	0.132729	0.0467372	0.124192	0.0390829	2.38585e-130
Atp6v0e2	1.50578	0.0843714	0.0297105	0.131509	0.0352862	1.43505e-160
Itpr3	1.50565	0.323743	0.114013	0.438807	0.137274	0
Smox	1.50235	0.670413	0.236641	0.663246	0.256979	0
Akr1b8	1.48429	1.03596	0.370277	0.86526	0.369314	0
Rad18	1.48046	0.176421	0.0632248	0.251235	0.0752624	2.28949e-285
Exoc3l4	1.47691	0.158742	0.0570294	0.235557	0.0689347	2.73037e-272
Mical2	1.47204	0.188429	0.0679232	0.264158	0.0778679	3.06614e-306
Rab3b	1.46995	0.0783385	0.0282798	0.119631	0.0312663	4.10283e-149
Sema5a	1.46701	0.405185	0.146568	0.468833	0.152088	0
Fen1	1.46186	0.157961	0.0573437	0.217313	0.0700514	8.02958e-228
Arhgap6	1.46068	0.655579	0.238186	0.652319	0.250651	0
Mad2l1	1.46038	0.203464	0.0739382	0.25209	0.083749	3.2034e-261
Gchfr	1.45821	1.07662	0.391828	0.77119	0.361126	0
Sh3kbp1	1.45816	0.986753	0.359136	0.829723	0.365146	0
Nanos1	1.45734	0.0766576	0.027916	0.118871	0.0339463	8.78749e-136
Ptges	1.45445	1.1304	0.412476	0.878183	0.396784	0
Coch	1.45082	0.399844	0.146268	0.345211	0.133477	0
Adssl1	1.44984	0.117908	0.0431615	0.17997	0.0518127	9.57319e-207
Cd68	1.44764	0.0872393	0.0319837	0.126473	0.0381895	3.0848e-137
Nptxr	1.44606	0.272908	0.100164	0.366401	0.119333	0
Spred1	1.44472	0.957261	0.351661	0.826777	0.359711	0
Ptger1	1.44299	0.0912997	0.0335804	0.146142	0.0395295	6.99467e-176
Celf4	1.44178	0.399142	0.14693	0.467408	0.163552	0
Pdpn	1.43779	1.87513	0.69217	0.95496	0.556019	0
Kcnj15	1.43538	0.309705	0.114513	0.323451	0.122236	1.28235e-304
Maff	1.43469	0.136497	0.050494	0.208571	0.061267	1.65595e-236
Vav3	1.43039	0.548583	0.203542	0.541809	0.208293	0
Hspa1a	1.42297	0.120085	0.0447852	0.174553	0.0525571	6.66959e-191
B4galt5	1.42285	0.903733	0.33707	0.768719	0.336931	0
Hspa4l	1.41931	0.701421	0.262256	0.696313	0.274473	0
Gfra4	1.41912	0.264257	0.0988163	0.342835	0.112335	0
Ank3	1.41821	1.0263	0.384016	0.8187	0.360902	0
Msln	1.41803	0.0838604	0.0313825	0.111365	0.0367007	4.17127e-109
Ano3	1.41658	0.17822	0.0667612	0.230901	0.0720613	5.30506e-249
Synj2	1.41119	0.276293	0.103886	0.386735	0.126182	0
Fkbp5	1.41012	0.206849	0.0778331	0.265393	0.0886622	2.2324e-269
Aldh1a2	1.40926	0.255011	0.0960129	0.196978	0.0637981	1.82806e-204
Ch25h	1.40723	0.105676	0.0398437	0.132554	0.040274	2.01031e-142
Fst	1.40272	1.88511	0.712979	0.877803	0.55118	0
Anxa8	1.39995	0.688339	0.26084	0.587989	0.231222	0
Suv39h1	1.39748	0.275291	0.104498	0.34274	0.123502	0
Tubb6	1.39329	0.964144	0.367046	0.750475	0.336559	0
Mns1	1.39059	0.114493	0.0436684	0.15821	0.0522594	1.84696e-156
Plvap	1.38551	0.602072	0.230446	0.527271	0.230031	0
Rbl1	1.38299	0.108338	0.041539	0.162771	0.0521105	1.445e-165
Socs5	1.38274	0.815583	0.312768	0.774135	0.324202	0
Hhipl1	1.37905	0.129734	0.0498791	0.185576	0.0609693	2.58191e-185
Mcm3	1.37798	0.285474	0.109838	0.314234	0.11911	1.29882e-288
Slc30a4	1.37673	0.912858	0.351533	0.795325	0.369314	0
Sgcd	1.37335	0.317377	0.122505	0.421513	0.141294	0
Khdrbs3	1.37331	0.682566	0.263473	0.666667	0.268294	0
Rab20	1.37313	0.152948	0.0590461	0.233561	0.071838	4.93111e-251
Dbf4	1.37312	0.314273	0.121327	0.34065	0.130276	0
Dusp14	1.36837	0.201902	0.0782025	0.298366	0.0966277	0
Pml	1.36713	0.396094	0.153551	0.485747	0.174645	0
Dock4	1.36711	0.564959	0.219016	0.58951	0.229435	0
Ngf	1.36643	0.149737	0.0580755	0.214747	0.064617	1.40857e-235
Cep250	1.36618	0.418428	0.162316	0.514443	0.184694	0
Pcbp3	1.3648	0.124202	0.0482261	0.192987	0.0602993	3.05389e-202
Rgs17	1.35888	0.457033	0.178191	0.501235	0.177324	0
Hspa1b	1.35276	0.267277	0.10465	0.336659	0.118589	0
Polk	1.34965	0.511106	0.200552	0.586754	0.21946	0
Sema3a	1.34948	0.578322	0.226952	0.579152	0.219236	0
Coro1c	1.34812	0.419784	0.164893	0.527366	0.188863	0
Iffo2	1.34674	0.462262	0.181751	0.558058	0.206283	0
Procr	1.34202	0.322432	0.127189	0.405169	0.146579	0
Aaas	1.34166	0.443729	0.175081	0.54504	0.198839	0
Celf5	1.34148	0.159849	0.0630788	0.209996	0.0716147	9.68506e-202
Sipa1l2	1.34051	0.20064	0.0792292	0.280692	0.0937244	9.67821e-282
Socs6	1.33847	0.683965	0.270467	0.656024	0.295987	0
Sox2	1.33696	0.121428	0.0480678	0.121627	0.0448895	1.07044e-103
Ly75	1.33509	0.0870884	0.034519	0.127613	0.0394551	2.75576e-133
Tnfrsf10b	1.33318	0.478495	0.189911	0.587609	0.217524	0
Por	1.32455	0.907206	0.362224	0.824116	0.374525	0
Trim16	1.32441	0.160642	0.0641466	0.243444	0.075858	3.23072e-257
Sncg	1.31906	0.68597	0.274934	0.419802	0.171146	0
Angptl7	1.31662	1.17892	0.473306	0.649088	0.297774	0
C2cd4a	1.31481	0.296972	0.119376	0.25038	0.106752	2.98618e-189
Zfp52	1.31149	0.202302	0.0815086	0.290954	0.0984144	1.08377e-286
Etv5	1.31111	0.524706	0.211463	0.602813	0.196829	0
Cav2	1.30965	0.541811	0.218577	0.627993	0.242314	0
Sipa1l3	1.30634	0.263995	0.106745	0.364975	0.127894	0
Uchl1	1.30501	0.063349	0.0256385	0.0978715	0.0317129	8.5034e-97
Slc35e4	1.30316	0.461425	0.186986	0.56927	0.213876	0
Rfc5	1.303	0.294581	0.119389	0.371817	0.139656	0
Bdnf	1.29678	0.696687	0.283576	0.624667	0.262265	0
Cks2	1.29648	1.02259	0.416315	0.749335	0.382416	0
Incenp	1.29599	0.293623	0.11958	0.292759	0.127298	3.21035e-221
Cbarp	1.29522	0.0833447	0.0339608	0.135215	0.042135	5.24283e-139
Itga3	1.29508	0.0958586	0.0390636	0.146332	0.0499516	2.57662e-136
Mink1	1.29391	0.346609	0.141362	0.455815	0.164967	0
Cgnl1	1.29291	1.19318	0.486968	0.835614	0.452542	0
Sgip1	1.29291	0.252332	0.102983	0.301786	0.111814	4.57671e-270
Shmt1	1.29291	0.0793731	0.0323944	0.127613	0.0420606	1.47793e-123
Sema6d	1.29014	0.304123	0.124359	0.377613	0.137572	0
Sh2b3	1.28156	0.319713	0.131514	0.428164	0.154843	0
Inhbb	1.28093	0.804098	0.33091	0.692037	0.318842	0
Fam83d	1.27768	0.14846	0.0612337	0.184911	0.0684881	2.75595e-159
Rras2	1.27756	0.347975	0.143538	0.420658	0.165637	0
Chaf1b	1.27336	0.130111	0.0538265	0.167712	0.0604482	3.298e-148
Ptges3l	1.27154	0.215866	0.0894152	0.323166	0.107496	0
Hsd11b1	1.26567	0.152679	0.0635004	0.199639	0.0736991	5.47293e-173
Airn	1.26179	0.541385	0.225771	0.591885	0.242611	0
Dennd2c	1.26097	0.0934666	0.0390001	0.142816	0.0452617	4.08442e-144
Ifi207	1.26035	0.313083	0.130695	0.360509	0.138018	0
Trib1	1.26002	0.235778	0.098446	0.31946	0.113005	1.31261e-300
Nedd4l	1.25885	0.264729	0.110625	0.36412	0.131691	0
Smim3	1.25485	0.311797	0.130654	0.392721	0.151418	0
Psat1	1.24976	0.830397	0.349197	0.758362	0.342589	0
Mcm2	1.2489	0.183155	0.0770661	0.251425	0.0904489	1.60325e-226
LTO1	1.24618	0.390491	0.164617	0.503136	0.191692	0
Bora	1.24503	0.10188	0.0429828	0.149278	0.0511427	4.17343e-138
Poc1a	1.24294	0.0890254	0.0376143	0.139301	0.0466017	4.63591e-132
Dhfr	1.2395	0.249454	0.105649	0.268719	0.114643	2.38626e-200
AI593442	1.23916	0.326012	0.138105	0.291429	0.11576	5.36448e-241
Unc5b	1.23836	0.329798	0.139787	0.40783	0.154396	0
Def6	1.23729	0.39369	0.166992	0.489453	0.186481	0
Prune2	1.23649	0.0960598	0.0407681	0.148233	0.0541204	1.09101e-126
Peak1	1.23412	1.67485	0.711983	0.957526	0.593985	0
Gbe1	1.23314	0.190803	0.0811655	0.278126	0.0987866	4.91205e-253
Mapk6	1.23244	0.831285	0.353793	0.734036	0.368272	0
Ndc1	1.23175	0.29323	0.124858	0.389681	0.145686	0
Loxl3	1.23096	0.750222	0.31962	0.684055	0.333507	0
Lmnb1	1.22999	0.190214	0.0810925	0.213702	0.0858334	8.79088e-167
Gprc5b	1.22895	0.264802	0.112972	0.370011	0.136008	0
Tec	1.22687	0.0817378	0.034922	0.134645	0.0436239	5.61631e-132
Dglucy	1.22661	0.236945	0.101252	0.334759	0.116653	0
Bcl2	1.22636	0.074877	0.0320021	0.122102	0.0401251	8.20302e-118
Ncapg2	1.2244	0.135625	0.0580442	0.170372	0.0644681	2.37782e-140
Tnfrsf1b	1.2198	0.182336	0.0782845	0.27233	0.0934266	7.26377e-256
Zwint	1.21868	1.44466	0.620737	0.931205	0.566292	0
Endod1	1.21714	0.221719	0.0953691	0.306823	0.115611	3.25189e-264
Gramd4	1.21707	0.226702	0.0975173	0.331338	0.115536	0
Dck	1.2143	0.078853	0.0339843	0.119631	0.0412417	5.53622e-109
Deptor	1.20768	0.512917	0.222075	0.500285	0.215961	0
Rab3ip	1.20766	0.252221	0.109204	0.324781	0.128713	6.35173e-264
Cep128	1.20521	0.0766072	0.033225	0.118016	0.0395295	5.16695e-111
Myo5a	1.20344	0.894592	0.388466	0.790004	0.395146	0
Chek1	1.20329	0.0754314	0.0327586	0.116401	0.0401995	9.31628e-106
Ccn3	1.20219	1.90698	0.828803	0.915906	0.543959	0
Cdk20	1.20037	0.162533	0.0707283	0.234892	0.0836001	2.01353e-209
Lama5	1.19852	0.286267	0.124733	0.370867	0.146579	0
Cenps	1.19758	0.186502	0.0813163	0.259407	0.0948411	1.03792e-226
Cdk6	1.19601	0.51268	0.223775	0.585044	0.24544	0
Scmh1	1.19595	0.589588	0.257354	0.664766	0.279684	0
Ntrk2	1.19494	0.322694	0.140955	0.314139	0.138763	5.49136e-224
Hells	1.1932	0.258517	0.113058	0.300361	0.121492	1.06843e-238
Oaf	1.18969	1.97471	0.86571	0.973299	0.698355	0
Slc25a10	1.18888	0.273327	0.119893	0.387115	0.142783	0
Ctnnal1	1.18762	0.480528	0.210965	0.536203	0.233232	0
Cenpt	1.18728	0.311072	0.136601	0.418377	0.161319	0
Stk10	1.1859	0.120944	0.053161	0.192512	0.0681903	1.94429e-170
Plxna4	1.18582	0.118676	0.0521672	0.158115	0.0576193	1.78049e-134
Sqor	1.18467	1.06914	0.47034	0.825162	0.459093	0
Dnajc9	1.18364	0.760166	0.334655	0.678449	0.333879	0
Ttc9	1.18297	0.127843	0.0563076	0.184911	0.0685625	2.35434e-155
Masp1	1.18273	1.75076	0.771239	0.942037	0.557061	0
Btbd19	1.17894	0.127662	0.0563854	0.198309	0.0684136	1.21026e-180
Hspa12a	1.17655	0.100275	0.0443623	0.154694	0.054046	5.52159e-138
Gale	1.1764	0.258784	0.1145	0.36279	0.134817	0
Myc	1.17006	0.118912	0.0528447	0.182535	0.0643937	2.60533e-161
Il1rl1	1.16843	1.87933	0.836122	0.897853	0.488498	0
Gsap	1.16568	0.167004	0.0744428	0.251425	0.0900767	6.12935e-221
Slfn9	1.1655	0.225894	0.100706	0.231281	0.105114	1.01228e-149
Eps8l2	1.16428	0.255962	0.114206	0.329152	0.127968	5.07556e-272
Cmtm8	1.16275	0.162003	0.07236	0.200019	0.0815901	1.36522e-149
Stac2	1.1612	0.208526	0.0932405	0.291619	0.10839	5.02698e-250
Pmf1	1.15716	0.344147	0.154314	0.409445	0.171592	0
Satb2	1.15589	0.121048	0.0543251	0.176549	0.0611181	1.07503e-159
Cdr2	1.15443	0.503972	0.226407	0.579913	0.253778	0
Nr2f1	1.15234	0.230698	0.10379	0.285158	0.110846	1.13752e-230
Samd5	1.1523	0.587986	0.264539	0.542474	0.265763	0
Elovl7	1.15175	0.125577	0.0565193	0.166477	0.0652125	4.25582e-128
Abcd2	1.15	0.147206	0.0663347	0.20439	0.0792824	1.92289e-160
Sms	1.14996	0.857094	0.386239	0.756461	0.368793	0
Nqo2	1.14862	0.473749	0.213688	0.563664	0.243058	0
Slc23a2	1.14604	0.290486	0.13126	0.369156	0.154694	8.76577e-279
Plekho2	1.14494	0.617707	0.279333	0.675124	0.299561	0
Wdr36	1.14464	0.50711	0.229368	0.603003	0.257351	0
Srxn1	1.14267	0.64307	0.291261	0.686336	0.317353	0
Gngt2	1.14001	0.305429	0.13859	0.302737	0.127522	1.0132e-226
Hopx	1.13846	1.46909	0.667325	0.827727	0.461029	0
Frmd4a	1.13805	0.330297	0.150078	0.404599	0.16385	0
Angpt2	1.13676	0.300345	0.136591	0.329818	0.144867	7.74125e-230
Tnfaip2	1.13468	1.44813	0.659534	0.927784	0.557805	0
Evi2a	1.13449	0.651267	0.29665	0.602052	0.254225	0
B3gnt2	1.12935	0.388502	0.177593	0.491733	0.200551	0
Lrig1	1.12773	0.328705	0.150427	0.438997	0.169582	0
Gap43	1.12667	0.298383	0.136651	0.29675	0.133477	1.12101e-198
Fam20c	1.1253	0.297385	0.136324	0.395002	0.161394	0
Mcm6	1.12474	0.285884	0.131102	0.324876	0.139433	3.65022e-236
Trim47	1.12436	0.232257	0.106538	0.31699	0.121417	4.60818e-260
Mapkapk3	1.12257	0.126346	0.0580276	0.195648	0.0706469	2.19378e-167
Tmem238	1.11753	0.280922	0.129472	0.378943	0.153354	5.99395e-297
Timeless	1.11519	0.132016	0.0609426	0.194223	0.0706469	3.32336e-164
Id1	1.11365	1.27968	0.591369	0.812524	0.425891	0
Rttn	1.11327	0.0759046	0.0350865	0.122482	0.042805	1.11878e-107
Baiap2	1.11276	0.688768	0.318493	0.722064	0.331423	0
Usp2	1.11227	0.16788	0.0776553	0.236602	0.09231	4.60071e-185
Mtmr11	1.10794	0.341988	0.158667	0.459806	0.181493	0
Xylt1	1.10329	0.218519	0.101711	0.29618	0.117621	1.30077e-229
Lrrc8d	1.1011	0.2194	0.102276	0.321646	0.124991	6.54045e-256
Rangap1	1.09736	0.545025	0.254729	0.570981	0.274324	0
Ttyh2	1.09634	0.32005	0.149688	0.43168	0.174421	0
Lrp12	1.09467	0.203759	0.0954088	0.280122	0.11375	9.34593e-208
Glul	1.09319	0.443425	0.207844	0.517104	0.230477	0
Tspan7	1.09179	0.186699	0.0875954	0.259027	0.104221	3.83523e-194
Emp1	1.08802	2.59003	1.21837	0.988312	0.756942	0
Adam19	1.08311	0.559712	0.26419	0.608704	0.27894	0
Slc25a24	1.08276	0.692021	0.326721	0.719118	0.34713	0
AI506816	1.07695	0.697133	0.330461	0.641866	0.331497	0
Pvr	1.07644	0.211998	0.100529	0.314139	0.120673	1.58276e-250
Sik3	1.07379	0.491343	0.233422	0.595116	0.258468	0
Gsdmd	1.07134	0.496125	0.236094	0.557868	0.248493	0
Mms22l	1.06966	0.102054	0.0486218	0.16087	0.0606715	2.63283e-128
Prim1	1.06911	0.15564	0.07418	0.187761	0.0792079	1.10218e-129
Chaf1a	1.06857	0.243024	0.115872	0.315945	0.133701	1.59695e-224
Afdn	1.06837	0.711532	0.339299	0.707336	0.352192	0
Gadd45a	1.0676	0.649408	0.30984	0.512638	0.290181	2.86705e-276
Cenpp	1.0676	0.111189	0.0530499	0.150988	0.0585871	9.80196e-117
Fam122b	1.0675	0.0873458	0.0416765	0.133219	0.0505472	3.24309e-105
Nt5dc3	1.06657	0.231907	0.110724	0.334569	0.131988	8.46576e-258
Prkar2b	1.06462	0.405007	0.193633	0.459901	0.201816	0
Gfod1	1.06458	0.146692	0.0701351	0.216363	0.0807712	3.14278e-175
Smc2	1.06187	0.622615	0.29824	0.505416	0.282811	3.40993e-280
Cdc7	1.0595	0.0807338	0.038736	0.129799	0.0466761	1.34912e-109
Ltbp4	1.05845	0.157872	0.0758017	0.216933	0.0861312	2.4795e-162
Cdc45	1.05772	0.122826	0.0590044	0.178449	0.0707958	1.26976e-132
Atp8b1	1.05714	0.263226	0.126502	0.333428	0.139284	2.26579e-240
Lingo1	1.05586	0.10402	0.0500346	0.164196	0.0594804	1.04885e-137
Aen	1.05489	1.01695	0.489494	0.873337	0.471376	0
Tgif1	1.05403	0.480124	0.231238	0.559198	0.253555	0
Ehd4	1.05178	0.500401	0.24138	0.576112	0.267401	0
Ltc4s	1.05002	0.100615	0.048593	0.117731	0.0476439	3.47823e-85
Fam124a	1.04734	0.117205	0.0567107	0.176169	0.0670736	1.5849e-138
Ezr	1.04436	0.14592	0.0707507	0.2061	0.0825579	5.03723e-152
Ccnyl1	1.04411	0.222497	0.107899	0.332098	0.131021	6.53691e-253
Galnt7	1.04408	0.371763	0.180289	0.471969	0.201891	0
Col15a1	1.04282	0.124987	0.0606657	0.124192	0.0548649	4.59646e-78
Atp2b1	1.04109	2.12581	1.03306	0.979856	0.764088	0
Tuba4a	1.03962	0.663177	0.322606	0.665906	0.327924	0
Mustn1	1.03926	0.269516	0.131141	0.299506	0.139358	3.54031e-185
Cst6	1.03899	1.86381	0.907058	0.910015	0.557061	0
Pola1	1.03762	0.141206	0.068786	0.191467	0.0782402	6.73375e-137
Serinc5	1.03683	0.150267	0.0732399	0.218073	0.0862801	1.17011e-162
Xdh	1.03498	0.912275	0.445211	0.782307	0.410333	0
Hsph1	1.03483	0.796972	0.388979	0.764158	0.396412	0
Zdhhc12	1.03201	0.366863	0.179406	0.476815	0.205911	0
Rbpms2	1.03157	0.133302	0.0652082	0.209426	0.0801012	9.72577e-164
Chst7	1.03096	0.148325	0.0725877	0.220258	0.085759	1.18266e-168
Ipmk	1.03059	0.332085	0.162558	0.418282	0.184546	4.17151e-287
Maml3	1.02889	0.1662	0.0814526	0.234417	0.0918633	6.42134e-177
Slc2a1	1.0278	0.498603	0.244543	0.581623	0.264051	0
Prkca	1.02568	0.437107	0.214698	0.539624	0.241346	0
Haspin	1.02555	0.104029	0.0511013	0.154504	0.0611926	3.34538e-114
Adss	1.02462	0.986634	0.48497	0.84122	0.476364	0
Gsto1	1.02372	1.37306	0.675336	0.909635	0.593241	0
Mast4	1.02025	0.924957	0.456034	0.810338	0.434974	0
Klhdc8a	1.02013	0.276669	0.136418	0.307868	0.139954	3.32502e-196
Nsd2	1.01967	0.336134	0.165792	0.397662	0.180749	2.45165e-262
Anxa3	1.01955	1.30028	0.641387	0.852908	0.515224	0
Acaa1b	1.0174	0.159758	0.0789214	0.197358	0.0894067	3.66314e-120
Sbsn	1.01579	0.542101	0.2681	0.509882	0.257054	0
Pparg	1.01507	0.187757	0.0929027	0.210091	0.103774	1.48702e-110
Bin1	1.01457	1.28135	0.634239	0.935101	0.578352	0
Lncpint	1.01379	0.219331	0.108622	0.301691	0.12313	2.88372e-217
Tnfrsf23	1.01171	0.251588	0.124777	0.360509	0.147324	3.05131e-261
Slc35d1	1.01083	0.259078	0.12857	0.368206	0.15112	1.62491e-267
Ccl5	1.01076	0.021049	0.0104463	0.0172938	0.00640214	2.78376e-15
Lig1	1.0097	0.289465	0.143763	0.304067	0.148292	2.84882e-174
Tgfb1	1.00925	0.630837	0.313402	0.668377	0.326882	0
Ggta1	1.00748	0.574952	0.28599	0.650798	0.303953	0
Cenpk	1.00644	0.183417	0.0913004	0.237932	0.100722	7.17891e-163
Lancl3	1.00618	0.110899	0.0552128	0.164386	0.062607	1.98083e-127
Chek2	1.00497	0.0765157	0.0381262	0.122672	0.0467505	3.2834e-95
Dusp1	1.00214	0.505663	0.252457	0.542284	0.247301	0
Specc1	1.00196	0.292665	0.146134	0.385405	0.166009	8.69845e-266
Hspa12b	1.00138	0.190847	0.0953327	0.2748	0.109581	6.28878e-202
Apln	0.996081	0.138513	0.0694447	0.175884	0.0778679	8.50532e-109
Ino80c	0.991524	0.224939	0.113132	0.332003	0.134222	2.05574e-240
Slc25a13	0.991121	0.0922135	0.0463914	0.152033	0.0582893	3.23939e-116
Micall2	0.990887	0.202245	0.101763	0.300551	0.121715	4.27413e-216
Pak3	0.990049	0.675327	0.340001	0.664861	0.346907	0
Gpd2	0.989367	0.48572	0.244657	0.583903	0.27224	0
Tcf19	0.986586	0.151654	0.0765351	0.192037	0.084419	5.98288e-122
Chn1	0.986352	0.138433	0.0698744	0.206861	0.0845679	5.40507e-146
Rasa2	0.985896	0.495968	0.25042	0.5687	0.272761	0
Cdkn2aipnl	0.984637	0.192108	0.0970825	0.287628	0.114494	1.11119e-210
Pgm2l1	0.983868	0.0921268	0.0465814	0.134074	0.0565026	8.16964e-89
Gcnt2	0.983517	0.128367	0.0649209	0.198214	0.0766768	2.54729e-150
Eogt	0.982565	0.0814301	0.0412101	0.131414	0.0517383	7.41423e-97
Limk1	0.978762	0.19101	0.0969211	0.268149	0.113899	4.24857e-179
Rrm1	0.97858	0.458059	0.232456	0.424173	0.236582	2.9545e-213
Gnao1	0.977402	0.142381	0.0723142	0.20287	0.0833023	4.21753e-141
Dpy19l1	0.97726	0.762549	0.387332	0.738788	0.384575	0
Notch1	0.977079	0.327538	0.166391	0.421418	0.18127	1.49749e-288
Smurf1	0.974796	0.29682	0.151025	0.412771	0.17792	4.51287e-279
Cenpq	0.971707	0.220152	0.112256	0.239168	0.120226	1.67604e-125
Pla2g4a	0.971527	0.485301	0.247487	0.547891	0.260925	0
Cep170b	0.971136	0.490646	0.25028	0.591315	0.276856	0
Inpp4b	0.965793	0.109986	0.0563123	0.169137	0.0674458	2.2573e-122
Rbm14	0.965625	0.235365	0.12052	0.341315	0.14174	1.91267e-236
Mcm7	0.964647	0.445255	0.22815	0.502566	0.243951	0
Crem	0.964534	0.306591	0.157111	0.415906	0.181493	1.3451e-277
Pear1	0.963963	0.549594	0.281748	0.621342	0.29435	0
Gnb4	0.963834	0.57532	0.294962	0.639491	0.312663	0
Lrrc32	0.963817	0.640586	0.328428	0.624382	0.315641	0
AU020206	0.963236	0.078187	0.0401025	0.125238	0.049505	1.86601e-91
Tonsl	0.961859	0.0730566	0.0375069	0.118776	0.0478672	3.51096e-84
Slk	0.961748	1.46909	0.754283	0.93035	0.621082	0
Glrx	0.960882	1.27831	0.656723	0.889491	0.585052	0
Adgre5	0.960796	0.169162	0.0869111	0.244679	0.100871	2.67985e-169
Uaca	0.959241	0.365317	0.187893	0.448119	0.210675	3.31638e-274
Nectin1	0.957727	0.279675	0.143995	0.394622	0.168168	2.73333e-266
Mdga2	0.956363	0.0880721	0.0453884	0.125808	0.0515894	8.67189e-88
Nde1	0.9562	0.363911	0.187564	0.468928	0.213355	2.61607e-302
Ccng1	0.955373	2.08315	1.0743	0.986507	0.743468	0
Cgas	0.953852	0.097652	0.0504131	0.151178	0.0603737	1.58229e-108
Hirip3	0.952555	0.239342	0.123672	0.291619	0.137795	1.06359e-167
Eif2b2	0.952051	0.535903	0.277007	0.639396	0.305293	0
Ptrh1	0.951717	0.553141	0.285983	0.63588	0.31043	0
Fpgt	0.950477	0.193861	0.100316	0.279932	0.117025	7.23778e-190
Sh3rf1	0.948871	0.201721	0.104499	0.283542	0.11844	1.32494e-191
Lmnb2	0.945251	0.0943324	0.0489905	0.152223	0.0596293	9.44147e-112
Frmd8	0.94454	0.42552	0.221098	0.547605	0.251098	0
Abcd4	0.943393	0.486814	0.253147	0.583143	0.278121	0
Igf2r	0.942606	1.40776	0.732444	0.93301	0.619445	0
Mlkl	0.940197	0.333708	0.173916	0.438521	0.200774	7.38429e-272
F11r	0.939385	0.0881512	0.0459669	0.125333	0.0518871	4.74349e-85
Zfp367	0.939329	0.0726372	0.0378785	0.11374	0.046155	8.55956e-80
Atrn	0.93813	0.407156	0.212498	0.511307	0.238666	0
Crip2	0.933557	2.4776	1.29718	0.989358	0.778828	0
Trim11	0.932626	0.426377	0.223381	0.54504	0.247078	0
Sipa1	0.930015	0.307405	0.161342	0.420087	0.183354	1.16542e-269
Gclc	0.929277	0.277443	0.145691	0.372482	0.166902	1.55937e-230
Mad1l1	0.929214	0.332789	0.174763	0.444223	0.201593	1.01712e-275
Utp20	0.929129	0.365155	0.19177	0.475865	0.217003	5.44188e-298
Vsir	0.928779	0.0743127	0.0390367	0.116211	0.0489838	1.65977e-76
Dusp7	0.926826	0.417484	0.219602	0.529837	0.242463	0
Prim2	0.926134	0.141873	0.074663	0.214367	0.0892578	1.16215e-143
Plk4	0.925686	0.185835	0.0978292	0.234892	0.10906	1.33758e-135
Gins2	0.92403	0.35367	0.186397	0.45287	0.209633	4.7296e-279
Il34	0.923854	0.266953	0.140711	0.347491	0.159011	1.23314e-209
Pop1	0.920616	0.0933203	0.0492995	0.150703	0.0596293	5.10857e-109
Gng2	0.918378	0.22844	0.120868	0.306062	0.136455	3.59624e-188
Pitpnm1	0.915001	0.339195	0.17989	0.457241	0.207995	1.58014e-280
Haus6	0.914386	0.117512	0.0623481	0.18187	0.0757091	7.43524e-122
Hprt	0.913977	0.785315	0.416783	0.770905	0.424254	0
Abl2	0.91145	0.365017	0.194062	0.480331	0.217747	7.38668e-297
Plekhn1	0.911421	0.350375	0.186281	0.461231	0.209335	9.61634e-284
Qpctl	0.910975	0.27177	0.144534	0.381604	0.172858	1.34676e-229
Enpp1	0.909388	0.871383	0.463934	0.652414	0.413013	0
Cdc42bpg	0.908046	0.170727	0.0909817	0.245249	0.106231	1.17967e-153
Myadm	0.906278	1.07672	0.574496	0.860129	0.529517	0
Panx1	0.905219	0.0899469	0.0480273	0.140536	0.0585126	7.86742e-94
Ets1	0.903836	0.250066	0.133651	0.348727	0.149929	4.84904e-227
Nmt2	0.901917	0.467549	0.250221	0.537818	0.276037	8.6379e-302
Hmgn5	0.901562	0.317213	0.169806	0.397567	0.180302	5.89096e-243
Pak1	0.901531	0.634031	0.339409	0.661631	0.355542	0
Map3k20	0.901326	0.710988	0.380659	0.737932	0.385543	0
Ppil1	0.899832	0.371778	0.199254	0.470068	0.225936	1.66492e-269
Ccp110	0.898902	0.146215	0.0784142	0.210281	0.0920867	3.27303e-129
Cd109	0.897704	0.390168	0.209419	0.457811	0.220353	1.11764e-267
Map2k3	0.893857	1.03422	0.55659	0.879418	0.531006	0
Lrrc8b	0.893728	0.0967206	0.0520571	0.156689	0.0664036	2.95535e-101
Adamts7	0.891384	0.148272	0.079933	0.212657	0.0917144	1.5571e-133
Cux1	0.889983	0.479133	0.25855	0.575162	0.283183	0
Ttc39b	0.889165	0.269833	0.14569	0.376378	0.168912	1.30013e-227
Lpin2	0.888403	0.299264	0.161666	0.414671	0.18797	1.50419e-247
Filip1l	0.888306	0.660719	0.356952	0.613455	0.329338	0
Vasp	0.885869	0.838975	0.454021	0.805397	0.452096	0
Psrc1	0.885586	0.911484	0.493357	0.820506	0.436239	0
Pole2	0.884796	0.0787739	0.0426611	0.127423	0.0511427	9.04092e-90
Cadm1	0.884296	0.0766913	0.0415477	0.101387	0.0437728	1.75353e-64
Fnip2	0.883776	0.345235	0.187099	0.431205	0.209261	3.65503e-241
Ampd3	0.88307	0.440265	0.238717	0.484227	0.251396	3.83743e-258
Ccdc9b	0.882759	0.271216	0.147088	0.358229	0.166456	1.5894e-205
Layn	0.882323	0.732929	0.397609	0.748385	0.405271	0
Trim8	0.880533	0.686314	0.372783	0.737457	0.39068	0
Tafa5	0.880473	0.235051	0.127677	0.303402	0.146654	8.67844e-161
Cdk1	0.880168	0.593814	0.322622	0.471399	0.30708	1.9246e-156
Lbr	0.879205	0.262051	0.142468	0.342265	0.162064	6.6812e-190
Plekhb2	0.878865	0.413917	0.225086	0.527366	0.25683	1.1194e-300
Rassf7	0.878715	0.107994	0.0587327	0.174648	0.0740713	2.6563e-112
Timm8a1	0.87756	0.484409	0.263657	0.582288	0.291	0
Vps37b	0.877437	0.188425	0.102566	0.278506	0.119854	1.29184e-175
Pla2g12a	0.876331	0.421882	0.229821	0.535348	0.255714	0
Gsto2	0.876279	0.091852	0.0500383	0.145477	0.063947	1.44682e-88
Acot7	0.875526	0.672801	0.366714	0.694603	0.368347	0
Polm	0.873447	0.135159	0.0737751	0.209901	0.0891834	3.05798e-134
Rtel1	0.873274	0.107141	0.0584888	0.168567	0.0730291	8.75002e-105
Caprin2	0.872251	0.0929618	0.0507845	0.146237	0.0611926	3.73553e-96
Haus2	0.871612	0.216002	0.118053	0.316895	0.139358	1.15872e-192
Adcy7	0.87043	0.0725735	0.0396965	0.119536	0.0479416	2.60772e-84
Sertad1	0.868482	0.577494	0.316307	0.655644	0.332539	0
Sat1	0.86734	1.94372	1.06546	0.962087	0.757686	0
Pla2g2e	0.867149	0.209938	0.115094	0.209996	0.117621	3.14018e-80
Mak16	0.865711	0.643909	0.353362	0.699544	0.370878	0
Gfer	0.865256	0.719466	0.39495	0.745439	0.408397	0
Epg5	0.865032	0.192369	0.105617	0.289814	0.126107	2.8263e-177
Cracr2b	0.864625	0.0797653	0.0438062	0.124952	0.0518871	2.42705e-83
Lrrfip1	0.864332	1.09836	0.60333	0.884265	0.554455	0
Nomo1	0.861711	0.581466	0.31998	0.663911	0.343929	0
Ttll7	0.861474	0.302007	0.166222	0.405074	0.191618	4.46546e-225
Efhd2	0.860188	0.574393	0.316422	0.643197	0.339984	0
Grem2	0.859908	0.180741	0.0995859	0.222729	0.102732	5.60222e-126
Cetn4	0.858014	0.0915274	0.0504967	0.144242	0.0584382	6.83941e-100
Ralgapa2	0.857674	0.117301	0.0647315	0.170087	0.0752624	7.35319e-101
Jade2	0.856603	0.0962767	0.0531689	0.148423	0.0621604	6.86113e-97
Uck2	0.855943	0.390845	0.215944	0.473014	0.239262	8.63566e-247
Cdk2ap2	0.855759	1.47956	0.817567	0.949069	0.678925	0
Il4ra	0.851602	0.595376	0.329939	0.626188	0.330157	0
Cdkn1a	0.850861	2.63397	1.46041	0.988883	0.733864	0
Apobec1	0.849614	0.194805	0.108104	0.260547	0.124618	1.4408e-137
Pter	0.8495	0.24836	0.137834	0.357279	0.161096	1.1471e-206
Chst15	0.848398	0.234088	0.130013	0.259692	0.134222	9.3587e-119
Ankrd28	0.846203	0.387923	0.215781	0.491258	0.235763	5.74373e-273
Tiparp	0.845337	0.796924	0.443552	0.729	0.426487	0
Bid	0.844709	0.134641	0.0749713	0.211231	0.09164	6.55449e-130
B4galnt1	0.84433	0.334781	0.186463	0.439282	0.207772	7.536e-244
Phc2	0.84402	0.560398	0.312191	0.650133	0.33239	0
Lacc1	0.843854	0.294543	0.164105	0.389206	0.183727	8.06022e-214
Bcat1	0.841409	0.131675	0.0734875	0.196123	0.0859078	3.9027e-119
Shb	0.83811	0.0748098	0.0418468	0.125523	0.0511427	4.18487e-86
Slc43a3	0.837522	0.190311	0.106499	0.242968	0.116579	3.5112e-127
G2e3	0.832437	0.242554	0.136213	0.300741	0.151641	5.33597e-144
Sh3glb2	0.832147	0.714751	0.40147	0.747719	0.409588	0
Icam1	0.83184	0.580389	0.32607	0.580673	0.312588	1.44036e-298
Myof	0.831783	1.46614	0.823726	0.948119	0.676766	0
Rfc4	0.83173	0.30104	0.169141	0.366401	0.184918	3.89506e-181
Fhod1	0.830606	0.244966	0.137743	0.348062	0.157076	1.88285e-199
Notch3	0.829564	0.102815	0.057854	0.142626	0.0682647	5.2112e-74
Klhl2	0.829541	0.164504	0.0925681	0.257127	0.111665	4.66654e-156
Ptpre	0.829476	0.459359	0.258497	0.541714	0.260925	0
Hk1	0.829175	0.776732	0.437184	0.781832	0.445693	0
Itga5	0.828933	0.408917	0.230198	0.517959	0.255118	1.6159e-274
Cflar	0.825964	1.00422	0.566487	0.845686	0.534579	0
Nfkbiz	0.82532	0.348127	0.196468	0.43054	0.212164	6.98047e-224
Tspyl5	0.824999	0.0661835	0.0373595	0.095496	0.0439961	3.33269e-53
Dcbld1	0.824338	0.13549	0.0765168	0.211802	0.0934266	3.71074e-126
Angptl2	0.822803	1.88045	1.0631	0.976245	0.738331	0
Zdhhc18	0.82173	0.291924	0.16516	0.415051	0.192362	3.78697e-228
Tshz3	0.821452	0.35061	0.198401	0.398613	0.208293	2.12807e-186
Gng8	0.821351	0.538628	0.304816	0.603953	0.307154	0
Hat1	0.82097	0.393569	0.222784	0.440707	0.24209	4.29082e-195
Mt2	0.820747	2.24948	1.27354	0.970544	0.707288	0
Map6	0.819705	0.40165	0.227558	0.503801	0.252587	1.31886e-260
Qpct	0.818756	0.166175	0.0942096	0.229	0.1037	5.75185e-131
Pold1	0.818289	0.114151	0.0647366	0.174078	0.0775702	1.01421e-101
Tob1	0.818136	0.649058	0.368129	0.685196	0.377205	0
Triobp	0.817364	0.916936	0.520341	0.837419	0.502122	0
Pqlc3	0.816686	0.645035	0.366215	0.686431	0.367826	0
Tgfbr1	0.816223	0.282803	0.160611	0.372767	0.180302	4.19201e-193
Tmtc3	0.815976	0.374461	0.212703	0.471399	0.233008	1.89024e-237
Adgrg6	0.81535	0.189538	0.107709	0.253706	0.118663	1.62134e-139
Nubp1	0.812664	0.75187	0.428062	0.775751	0.436314	0
Polr1e	0.812599	0.149339	0.0850267	0.230996	0.102732	3.42819e-134
Sac3d1	0.811857	0.674084	0.383991	0.711612	0.386585	0
Brca2	0.811218	0.106442	0.0606612	0.145762	0.0671481	4.5911e-81
Cerk	0.811116	0.20441	0.116502	0.304447	0.138018	4.66494e-172
Ptp4a3	0.811106	0.653538	0.372481	0.649848	0.379513	0
Cenpl	0.810917	0.0938537	0.0534984	0.141961	0.0643937	9.58325e-81
Tyms	0.810236	0.442793	0.25252	0.441847	0.258468	1.79524e-176
Plin4	0.809464	0.150199	0.0857028	0.196123	0.0986377	1.78166e-92
Crispld1	0.809168	0.182795	0.104323	0.222444	0.103477	5.26552e-123
Lrrc8c	0.80643	0.184973	0.105767	0.277366	0.123874	6.37728e-160
Il1rap	0.805882	0.398599	0.228003	0.482421	0.236433	8.557e-252
Cse1l	0.805801	0.356581	0.20398	0.462657	0.231892	1.24524e-231
Nup160	0.805239	0.147418	0.0843625	0.226055	0.10169	1.48048e-128
BC005537	0.804484	1.058	0.605778	0.866686	0.564356	0
Cndp2	0.804476	0.388269	0.222311	0.495154	0.24678	1.863e-251
Rcc1	0.804363	0.114686	0.0656709	0.18206	0.079059	1.4914e-110
Tex30	0.802773	0.146339	0.0838882	0.224249	0.102732	1.03253e-123
Zfp217	0.802645	0.134424	0.0770649	0.205435	0.0908956	4.85414e-120
Donson	0.802131	0.0786984	0.0451336	0.124762	0.0556838	6.68895e-73
Gda	0.801277	1.58111	0.907305	0.918852	0.639023	0
Rpa1	0.799918	0.358094	0.205683	0.443748	0.229063	3.32746e-211
Prkar2a	0.799772	0.500498	0.287506	0.579057	0.308941	2.15918e-281
Klhl42	0.799307	0.183877	0.10566	0.276891	0.125661	2.75226e-154
Cep85	0.799176	0.10631	0.0610941	0.169137	0.0748158	1.60554e-99
Cavin2	0.799108	1.60051	0.919821	0.864025	0.66225	0
Cda	0.798609	0.791695	0.455148	0.63854	0.394997	0
Tspan11	0.798039	0.704325	0.405079	0.722159	0.403335	0
Dnaaf2	0.796002	0.196817	0.113355	0.284303	0.135785	4.10551e-146
Inhba	0.79549	0.491369	0.283101	0.50019	0.269113	3.35023e-230
Dnmt1	0.794848	0.507521	0.292537	0.537058	0.304176	2.7854e-236
Msh6	0.794835	0.185092	0.106689	0.264348	0.124916	6.15039e-138
Msn	0.793442	1.8511	1.06802	0.975295	0.778456	0
Cpped1	0.793107	0.462072	0.266662	0.563474	0.289734	6.97267e-276
Acsl4	0.792996	0.410346	0.236829	0.512638	0.26085	6.49698e-250
Dvl1	0.792827	0.258168	0.149017	0.376378	0.175091	2.39729e-201
Tmod1	0.79208	0.228297	0.131844	0.27404	0.135562	1.06477e-135
Fxyd5	0.79146	1.33504	0.771329	0.856043	0.546118	0
Hmgb3	0.79124	0.132762	0.0767161	0.184626	0.0885878	1.49624e-94
Lrig2	0.789178	0.242901	0.140561	0.337039	0.16117	9.68777e-172
Grwd1	0.788282	0.198056	0.114681	0.300266	0.136753	4.7159e-166
Ipo7	0.788097	0.625364	0.362153	0.677214	0.379662	0
Ikbke	0.78788	0.168696	0.0977081	0.253611	0.117472	4.05884e-136
Lyrm9	0.786668	0.109096	0.0632411	0.17978	0.0781657	1.00306e-108
Lrwd1	0.786493	0.227318	0.131788	0.325827	0.152981	1.60627e-171
Myo1b	0.786195	0.855011	0.495796	0.760262	0.464677	0
Foxc2	0.785944	0.339672	0.197	0.442322	0.222958	7.62857e-213
Dock9	0.785034	0.167719	0.0973338	0.252851	0.113973	2.47367e-142
Mphosph9	0.784709	0.123956	0.0719528	0.189472	0.0866523	2.73823e-104
Tmem120a	0.784522	0.672718	0.390543	0.710471	0.402144	0
Zfp697	0.784074	0.0852112	0.0494843	0.137875	0.0607459	7.76024e-82
Ppp5c	0.7839	0.503952	0.292693	0.613075	0.321149	5.5267e-299
Mmp3	0.783465	4.30186	2.49925	0.999145	0.893918	0
Pgs1	0.783438	0.592797	0.344403	0.682725	0.364476	0
Ripk2	0.782915	0.160139	0.0930713	0.241733	0.110995	2.01629e-131
Ninj1	0.78282	0.834823	0.485224	0.757222	0.471302	0
Rftn1	0.781385	0.118426	0.0689013	0.168662	0.0809946	1.93114e-85
Lyn	0.780636	0.0895695	0.0521393	0.143006	0.065287	2.57269e-79
Dtnb	0.779245	0.174552	0.101707	0.270239	0.118514	5.09385e-158
Bloc1s2	0.776865	0.820492	0.478867	0.805682	0.473014	0
Lrrk2	0.776691	0.227245	0.132644	0.315374	0.150376	5.30407e-160
Rap2b	0.775982	0.833839	0.486955	0.792189	0.467952	0
Fut8	0.775711	0.354748	0.207209	0.451444	0.228169	1.29535e-214
Cep135	0.77563	0.092527	0.0540481	0.148708	0.0653614	5.16958e-88
Rab7b	0.774977	0.325412	0.19017	0.38778	0.202561	2.71488e-175
G6pdx	0.774538	0.579329	0.338662	0.652604	0.355021	0
Cdk2	0.773974	0.0909947	0.0532141	0.143006	0.0637981	1.26579e-82
Elk3	0.77343	0.861551	0.504029	0.81623	0.493858	0
Kif21a	0.772791	0.388067	0.227129	0.480616	0.245217	1.42353e-228
Cotl1	0.769551	0.548837	0.321948	0.600627	0.334996	5.24403e-271
Slc5a3	0.769325	1.93941	1.13783	0.961802	0.689422	0
Tpd52l1	0.769013	0.100566	0.0590138	0.160965	0.0732524	2.57635e-89
Nipal1	0.76893	0.289266	0.169756	0.364785	0.185364	6.6611e-172
Lipo3	0.768773	0.240107	0.140923	0.343881	0.163627	1.47467e-174
Ncs1	0.768093	0.381088	0.223772	0.504181	0.253927	4.27635e-241
Fndc10	0.768047	0.179851	0.105611	0.25152	0.119184	6.83862e-130
Rnf217	0.767928	0.297752	0.174858	0.416477	0.202114	7.50166e-206
Rangrf	0.767918	0.359546	0.211148	0.474344	0.240899	3.03028e-223
Pcolce2	0.767825	0.118788	0.0697642	0.15973	0.0745924	3.7534e-87
Ggct	0.765538	0.183578	0.107987	0.275941	0.131616	4.21046e-139
Mafg	0.765503	0.796171	0.468347	0.787628	0.458721	0
Tubb4b	0.765269	2.11088	1.24192	0.97824	0.806447	0
Zdhhc2	0.764457	0.0900583	0.0530151	0.145857	0.0660314	2.33365e-82
Otud3	0.763917	0.165174	0.0972704	0.259692	0.119259	4.98293e-140
Abhd2	0.763819	0.460182	0.271017	0.551216	0.288022	1.47554e-258
Tnfrsf21	0.76368	0.415898	0.24496	0.458761	0.240676	8.37891e-210
Sh3bp1	0.763312	0.298705	0.17598	0.413151	0.203975	1.91866e-199
Cdc42bpb	0.762612	0.526555	0.310366	0.621912	0.336187	9.70702e-288
Me2	0.762198	0.267668	0.157817	0.382079	0.184099	5.53827e-189
Glipr1	0.762152	0.532789	0.314141	0.45553	0.257798	2.23801e-193
Znrf1	0.761988	0.558929	0.329591	0.654884	0.350778	0
Fblim1	0.760527	0.382229	0.225622	0.457526	0.229212	8.30512e-219
Ttll12	0.75862	0.267349	0.158019	0.382839	0.186853	3.92639e-185
Calcrl	0.756002	0.139548	0.0826315	0.187856	0.0952133	1.17271e-84
Clip2	0.753743	0.296694	0.175958	0.410775	0.199732	6.53033e-200
Atad2	0.753359	0.371626	0.220456	0.375618	0.225638	2.57037e-127
Dhx34	0.752434	0.123372	0.0732335	0.190232	0.0880667	1.02018e-100
Hjurp	0.752246	0.266021	0.157931	0.322216	0.173081	6.79793e-133
Ptpdc1	0.751576	0.207954	0.123515	0.303022	0.141517	7.09128e-158
Sestd1	0.751503	0.370954	0.220341	0.47938	0.245515	3.55144e-218
Cstf2	0.751346	0.11144	0.066201	0.18035	0.0798035	4.32414e-104
Nup43	0.750828	0.227928	0.135449	0.331718	0.156257	1.52309e-169
Axl	0.750673	1.08105	0.642498	0.857279	0.571429	0
Thbd	0.750628	1.02237	0.607642	0.769669	0.49371	0
Cacnb2	0.750602	0.137567	0.0817635	0.199449	0.09164	3.82426e-108
Eps15	0.749657	0.477283	0.283862	0.583333	0.309983	1.88758e-262
Ptpn9	0.746031	0.718931	0.428657	0.744679	0.431103	0
Dbndd2	0.745508	0.192698	0.114936	0.282212	0.131691	3.54813e-148
Blm	0.745386	0.0736253	0.0439181	0.114785	0.0527805	3.50874e-63
Tmed5	0.74536	1.29307	0.771339	0.927594	0.653986	0
Ehbp1l1	0.744817	0.390517	0.233039	0.508647	0.255341	2.95926e-239
Gpc1	0.744373	0.693994	0.414264	0.692322	0.405866	0
F8a	0.743566	0.224048	0.133815	0.326872	0.156555	2.5376e-162
Wdr35	0.742489	0.479505	0.286604	0.557013	0.303879	4.30638e-240
Rtl8b	0.741881	1.33041	0.79553	0.858229	0.650115	0
Ttll11	0.741437	0.0801158	0.0479207	0.120011	0.0591082	1.2381e-57
Rrp12	0.74077	0.0681897	0.0408061	0.117256	0.0511427	2.51599e-70
Mast2	0.740069	0.257673	0.154271	0.372197	0.180228	2.76217e-180
Ufsp1	0.739751	0.1102	0.0659923	0.178354	0.0825579	5.26188e-95
Tpcn1	0.739631	0.219469	0.131439	0.31718	0.156406	1.02653e-149
Chka	0.739444	0.26881	0.161009	0.342835	0.176282	3.76268e-151
Xpo1	0.738276	0.515841	0.309224	0.592835	0.329636	8.57067e-258
Net1	0.738208	0.410859	0.246303	0.479761	0.255937	2.25782e-208
Nudt22	0.737469	0.531116	0.318558	0.608514	0.342515	1.1321e-255
Micall1	0.736868	0.237675	0.142614	0.343881	0.166381	4.49473e-167
Cyth3	0.736802	0.798261	0.479011	0.744774	0.454106	0
Ppa1	0.736609	0.67182	0.403192	0.695933	0.412045	0
Capg	0.735757	2.12024	1.27321	0.988027	0.830269	0
Nudt17	0.735482	0.0754011	0.0452872	0.126568	0.0573215	5.58719e-71
Vrk1	0.735186	0.170951	0.102697	0.247624	0.120747	3.63959e-119
Cdc42ep2	0.734727	0.498101	0.299325	0.542949	0.306856	2.86925e-225
Steap1	0.734297	0.600936	0.361229	0.640346	0.352416	2.17115e-292
Stxbp1	0.734243	0.352997	0.212198	0.476625	0.240378	3.41136e-217
Ptpn14	0.733743	0.605699	0.364232	0.65897	0.374451	9.61512e-289
Plpp2	0.733195	0.699793	0.420975	0.718453	0.425296	0
Tacc2	0.731539	0.586039	0.352949	0.636355	0.364401	3.9676e-272
Ptgfr	0.731518	0.861017	0.518564	0.684816	0.442046	4.51065e-298
Ei24	0.731302	1.36502	0.822234	0.945078	0.68689	0
Enpp4	0.730547	0.132719	0.0799867	0.201539	0.0984888	1.91749e-96
Arhgef7	0.730174	0.356001	0.214608	0.467978	0.240825	3.77213e-205
Ppat	0.730093	0.188513	0.113648	0.288293	0.134073	1.44e-148
Tubb3	0.72956	0.0783557	0.0472554	0.101197	0.0509938	1.14086e-46
Olfml2b	0.729155	0.71054	0.428638	0.644052	0.413757	5.9982e-246
Emilin2	0.728952	0.50188	0.302805	0.521095	0.295392	7.09938e-216
Slc27a1	0.72827	0.451912	0.272786	0.532022	0.291968	3.71291e-221
Arhgdib	0.72773	2.53909	1.53324	0.985272	0.859674	0
Stxbp5	0.727232	0.209332	0.126449	0.307488	0.145984	4.5771e-153
Fbxo33	0.723133	0.242176	0.146706	0.351197	0.169285	2.19551e-169
Ifi204	0.723102	0.516945	0.313162	0.555302	0.306558	1.77091e-228
Hyls1	0.722279	0.0701204	0.0425027	0.114025	0.0526316	8.15456e-62
Lin9	0.721718	0.102121	0.0619238	0.155834	0.0736991	8.51721e-80
Cdh13	0.72147	1.01054	0.612872	0.815564	0.536142	0
Sgk1	0.721302	0.953109	0.578108	0.743634	0.472568	0
Dtl	0.720559	0.095761	0.0581138	0.133599	0.065287	4.86776e-65
Nadk	0.719611	0.759362	0.461131	0.775181	0.4649	0
Magi1	0.719095	0.0896469	0.0544586	0.13759	0.0647659	1.3156e-71
Atf6	0.717735	0.251814	0.153116	0.356803	0.176208	1.15123e-164
Ccl11	0.717344	0.852134	0.518282	0.481281	0.28832	1.12549e-152
Cisd3	0.716504	0.368829	0.224459	0.483656	0.249163	7.48806e-211
Reep4	0.715025	0.316277	0.192674	0.411821	0.215812	3.74761e-173
Adk	0.713949	1.32303	0.806587	0.916477	0.669396	0
Man2a1	0.713943	1.32154	0.805678	0.911821	0.660835	0
Rnf169	0.713455	0.432346	0.26367	0.526416	0.279535	2.70136e-222
Tfap2a	0.713432	0.288636	0.17603	0.380844	0.191245	7.69844e-172
Steap2	0.712884	0.869349	0.530389	0.748765	0.488871	0
Itgav	0.712196	0.715991	0.437034	0.738312	0.43475	0
Sdc3	0.71186	0.262691	0.160381	0.367541	0.188417	8.49577e-159
Ppp1r18	0.710006	0.781067	0.47748	0.780027	0.46959	0
Mtmr10	0.709501	0.130695	0.0799239	0.205435	0.0957344	3.31795e-106
Eri2	0.708721	0.105797	0.0647335	0.164576	0.0771979	5.57788e-85
Vcpkmt	0.705827	0.301275	0.184709	0.425694	0.214621	4.22728e-189
Mertk	0.704762	0.0935954	0.0574249	0.143482	0.0682647	2.11176e-72
Eml1	0.704431	0.521719	0.320171	0.610034	0.336857	3.17219e-253
Nav1	0.704415	0.861832	0.528899	0.782022	0.48232	0
Pgd	0.703579	1.08786	0.667997	0.893957	0.600834	0
Itgb8	0.703348	0.183208	0.112516	0.258267	0.129011	8.73603e-118
Oga	0.703102	0.650832	0.399773	0.700874	0.405568	1.37292e-296
Pcna	0.702626	0.631598	0.388087	0.595496	0.383012	1.83184e-186
Dlst	0.702321	0.743055	0.456669	0.763398	0.463411	0
Srrt	0.700947	0.713405	0.438864	0.732421	0.439664	0
Atp6v0a1	0.70086	0.450146	0.276932	0.549981	0.304995	2.06305e-216
Nup93	0.700528	0.354195	0.217953	0.473014	0.242611	1.54827e-202
Mindy1	0.699433	0.462743	0.284963	0.564994	0.309685	2.64089e-227
Tjp1	0.698751	0.67035	0.413006	0.651653	0.407876	1.00605e-242
Orai1	0.697336	0.641649	0.395712	0.688046	0.406238	1.19208e-288
Prep	0.696224	0.309144	0.190799	0.43263	0.220427	2.29561e-185
Hsd17b12	0.695549	0.859997	0.531026	0.821076	0.511055	0
Ccdc163	0.695537	0.0747889	0.0461806	0.119156	0.0558327	1.43911e-62
Fam117a	0.695031	0.205267	0.126792	0.29447	0.142932	4.6528e-139
Nop2	0.694977	0.29637	0.183074	0.415811	0.211122	1.72543e-179
Fam149a	0.69497	0.296273	0.183014	0.420753	0.213504	3.34031e-181
Pgm2	0.694867	0.249118	0.153897	0.364595	0.179632	6.17384e-167
Rfc2	0.694822	0.508248	0.313988	0.576397	0.332539	5.62196e-220
Rab31	0.69409	0.508637	0.314388	0.604618	0.33775	3.53086e-239
Pea15a	0.694026	0.69161	0.427503	0.725865	0.426636	0
Helz2	0.693976	0.0881056	0.0544623	0.132554	0.0643192	2.83857e-64
Zfp385a	0.693883	0.303625	0.187698	0.405074	0.206432	7.38705e-174
Pitpna	0.693397	1.6196	1.00155	0.964652	0.773394	0
Ankrd9	0.692988	0.356803	0.220708	0.469023	0.246855	1.51829e-190
Tlnrd1	0.69276	0.344087	0.212876	0.449449	0.237698	6.27904e-183
Rb1	0.69266	0.199875	0.123665	0.289054	0.142708	3.6274e-132
Cyp2u1	0.692627	0.0935266	0.0578673	0.154694	0.0727313	4.13587e-79
Ptpn12	0.692238	0.386734	0.239347	0.504276	0.262265	9.86778e-211
Rgs12	0.690267	0.369551	0.229025	0.454105	0.250726	6.46348e-174
Shmt2	0.689157	0.288156	0.178719	0.395477	0.200774	2.56372e-172
Tmem63b	0.688789	0.643761	0.399373	0.703725	0.414502	5.20214e-285
Spp1	0.688567	5.17617	3.21166	1	0.968734	0
Fzd5	0.687818	0.159563	0.0990558	0.236127	0.12112	1.37949e-100
Cmtm4	0.687759	0.384949	0.238983	0.501615	0.26487	7.75425e-207
Trp53i11	0.68763	0.125597	0.0779795	0.167997	0.0947666	1.46124e-55
Sfmbt1	0.68757	0.129379	0.0803312	0.199924	0.0954366	1.19998e-98
Sbno2	0.687561	0.716781	0.445051	0.72577	0.430135	7.38668e-297
Ap3m1	0.686331	0.438851	0.272716	0.558058	0.299263	6.81705e-226
Sp9	0.686289	0.0707809	0.0439868	0.0858989	0.0438472	2.92029e-38
Slc20a1	0.685881	0.446609	0.277624	0.474724	0.280429	2.2755e-159
Fabp4	0.684584	0.528949	0.329104	0.492873	0.268146	1.23545e-210
Fah	0.684128	0.624851	0.388896	0.668757	0.394402	5.56499e-261
Mtap	0.68411	0.882508	0.549264	0.797986	0.526688	0
Mre11a	0.683874	0.178451	0.111084	0.267674	0.131914	1.42779e-122
Gpatch4	0.683479	0.339511	0.211401	0.446788	0.234869	6.30317e-184
Sass6	0.679649	0.113951	0.0711418	0.167332	0.0834512	4.81424e-76
Cobll1	0.677994	0.366088	0.228817	0.475865	0.249758	3.69044e-196
Rab32	0.676564	0.218611	0.136775	0.312144	0.158416	7.98346e-134
Ppard	0.676223	0.419185	0.262326	0.534303	0.289585	1.50299e-208
Klc3	0.675947	0.137528	0.086082	0.207051	0.0993077	1.16281e-100
Mis18a	0.675262	0.158546	0.0992847	0.231281	0.116057	1.93889e-102
Plxdc1	0.675213	0.112919	0.0707142	0.144527	0.0798035	1.32103e-52
Rap2c	0.674801	0.622394	0.389879	0.685196	0.400953	3.6108e-258
Prg4	0.673525	0.145075	0.0909582	0.137495	0.0786868	1.19435e-45
Ywhag	0.671386	1.45813	0.915567	0.959236	0.730589	0
Diaph1	0.670875	0.441	0.277004	0.553402	0.301571	2.14235e-213
Sesn2	0.670409	0.45398	0.285249	0.548461	0.293308	1.16604e-218
Ormdl2	0.670137	0.384495	0.241635	0.490973	0.262488	5.81516e-195
Dazap1	0.669118	0.924915	0.581671	0.8416	0.539939	0
Asph	0.668966	0.904156	0.568676	0.814424	0.536291	0
Alad	0.668891	0.604753	0.380384	0.660205	0.387627	9.5608e-252
Col18a1	0.668677	1.8103	1.13883	0.956861	0.747934	0
Zfpm1	0.666443	0.109906	0.0692471	0.175979	0.083079	1.57556e-88
Wdr12	0.664654	0.511104	0.322425	0.611269	0.341919	1.1847e-230
Pom121	0.664414	0.301165	0.190019	0.40688	0.213504	6.97649e-162
Slfn2	0.66431	0.167148	0.105469	0.211612	0.118663	1.86463e-73
Pfas	0.664014	0.106535	0.0672366	0.170087	0.0819623	5.3915e-82
Chst11	0.663585	0.136435	0.0861324	0.208856	0.104147	5.25578e-94
Ercc5	0.662829	0.489401	0.309125	0.585899	0.326733	2.32602e-219
Cep89	0.661903	0.171814	0.108594	0.240973	0.125065	2.01155e-98
Skp2	0.661584	0.138899	0.0878096	0.20553	0.102807	1.24246e-91
Arrdc3	0.659638	0.343379	0.217372	0.441467	0.229956	7.81694e-179
Cemip2	0.659575	0.233422	0.147771	0.324116	0.164074	3.29183e-138
Tbkbp1	0.658576	0.133405	0.0845128	0.194603	0.0981166	3.13402e-85
Adamtsl5	0.6576	0.63891	0.405026	0.670372	0.399836	3.50473e-256
Metap1	0.6558	0.31598	0.20056	0.436906	0.230552	3.88579e-172
Smg6	0.655607	0.555923	0.352904	0.596541	0.364699	2.88383e-195
Cdkn2b	0.655213	1.95255	1.23983	0.97577	0.821633	0
Rasa1	0.654913	0.922618	0.585968	0.804257	0.544927	0
Slc39a11	0.654771	0.150269	0.0954473	0.234987	0.11643	5.48473e-105
Avpi1	0.654525	1.02704	0.652465	0.836374	0.590486	0
Pgk1	0.653288	1.77235	1.12691	0.974534	0.80667	0
Jun	0.652593	1.92304	1.22332	0.965792	0.769374	0
Scrib	0.652442	0.184278	0.117238	0.283352	0.139507	7.66775e-127
Kctd12b	0.651477	0.177574	0.113048	0.221589	0.125288	7.76928e-74
Ssx2ip	0.651389	0.164194	0.104537	0.246579	0.122087	1.43333e-110
Cav1	0.65135	1.57389	1.00207	0.897567	0.679818	0
Poc1b	0.64998	0.106633	0.0679558	0.170277	0.0812179	1.2987e-83
Atad3a	0.649954	0.301777	0.192323	0.420468	0.218641	2.3525e-166
Ints11	0.649848	0.464133	0.295814	0.582098	0.321075	2.9542e-216
Ado	0.649701	0.342813	0.218513	0.461326	0.247748	3.91531e-173
Camkk2	0.649256	0.601731	0.383669	0.646142	0.387702	4.6204e-230
Anxa7	0.648694	1.16687	0.744299	0.909825	0.652423	0
Dlg3	0.648551	0.320506	0.204458	0.428259	0.227574	1.5583e-164
Dnm1	0.648057	0.652205	0.416198	0.708951	0.419415	9.68756e-265
Mob1b	0.647893	0.467248	0.298203	0.579152	0.322341	2.39336e-210
Gstp1	0.647324	1.20359	0.768448	0.897567	0.64952	0
Tspan13	0.646242	0.111554	0.0712763	0.127898	0.0641703	7.31598e-59
Spint2	0.645788	0.0758068	0.0484514	0.108514	0.0557582	5.50312e-47
Lyz2	0.645095	0.0238634	0.0152595	0.0292664	0.0175687	4.06085e-09
Crabp1	0.644752	4.20617	2.69028	0.993919	0.884017	0
Ints1	0.644525	0.304826	0.194998	0.429114	0.229212	8.49401e-163
Sacs	0.644268	0.100035	0.0640044	0.15726	0.0764535	1.19303e-74
Tnxb	0.643733	0.518207	0.331681	0.477195	0.291372	1.17771e-152
Ifrd2	0.643035	0.162804	0.104254	0.251805	0.126554	2.29429e-108
Exosc10	0.642784	0.506028	0.324098	0.606994	0.34713	6.77498e-216
Cdr2l	0.642652	0.323226	0.207038	0.43377	0.230775	8.045e-165
Pa2g4	0.641145	1.06615	0.683621	0.870772	0.608501	0
Ttc7	0.640147	0.165137	0.10596	0.249525	0.124991	2.79862e-108
Alg13	0.639693	0.0901209	0.0578441	0.149753	0.0716891	3.65315e-73
Flnb	0.639448	0.697289	0.44763	0.730236	0.43408	4.36309e-280
Gdpd1	0.639298	0.151009	0.0969518	0.224819	0.110251	7.26967e-104
Opa3	0.639021	0.397806	0.25545	0.521285	0.282141	7.80757e-193
Apol9b	0.638721	0.0966797	0.0620956	0.142436	0.0739224	6.29555e-59
Mrto4	0.638421	0.820368	0.527018	0.794945	0.509343	0
Mthfd1	0.638371	0.270624	0.173859	0.375143	0.200253	1.29361e-141
Mcfd2	0.637956	0.693626	0.44574	0.728145	0.448448	3.81529e-262
Mfsd12	0.637486	0.187634	0.120617	0.27328	0.142783	5.20851e-108
Spon2	0.63733	0.555551	0.357165	0.488502	0.317129	8.46239e-137
Lrrk1	0.63705	0.617689	0.39719	0.684531	0.404601	2.90269e-241
Dnaja4	0.636259	0.205693	0.132339	0.305207	0.155587	5.32755e-127
Clba1	0.635671	0.441725	0.284312	0.527081	0.30105	6.20228e-183
Car13	0.635429	0.150443	0.0968475	0.224534	0.115462	1.17557e-92
Cers6	0.634958	0.386291	0.248756	0.476815	0.269783	2.05678e-164
Rela	0.634529	0.459438	0.295948	0.582288	0.321596	3.10779e-210
Klhl5	0.634417	0.450415	0.290158	0.529932	0.312067	1.4419e-171
Sdk1	0.633984	0.255104	0.164388	0.354808	0.187374	4.24577e-136
Got1	0.633352	0.400318	0.258076	0.52423	0.284598	2.45724e-190
Zmat3	0.633183	0.954804	0.615613	0.849677	0.549393	0
Gltp	0.630555	0.59475	0.384166	0.652604	0.39403	1.43653e-222
Nacc1	0.630222	0.325523	0.210313	0.457336	0.242611	6.02361e-172
Dlg5	0.630025	0.453035	0.292736	0.559578	0.316162	8.5296e-192
Cebpd	0.629423	1.33247	0.861354	0.800456	0.61334	0
Lrrn3	0.629026	0.227963	0.147404	0.263778	0.157671	1.40862e-77
Pkm	0.629025	3.27643	2.11858	0.999525	0.966128	0
Mcm4	0.628621	0.375426	0.242824	0.434721	0.255565	1.79342e-138
Mocos	0.628342	0.0662568	0.0428628	0.110604	0.0524827	8.71554e-56
Acot9	0.628228	0.835776	0.540723	0.800836	0.518127	0
Gas7	0.628053	0.206329	0.133505	0.265108	0.139582	7.49406e-106
Rrp9	0.628021	0.245482	0.158842	0.359464	0.183801	2.39034e-144
St3gal4	0.627898	0.368076	0.238189	0.485557	0.264721	2.66628e-174
Cenpv	0.62743	0.249678	0.161624	0.356233	0.184024	1.93481e-141
Cdkn2d	0.627252	0.558527	0.361595	0.588179	0.3679	5.13345e-179
Mcl1	0.626656	1.33482	0.864531	0.944128	0.712946	0
Carhsp1	0.625388	1.3571	0.879734	0.943273	0.711159	0
Pola2	0.625041	0.114517	0.0742533	0.177594	0.0891834	1.06925e-77
Usp12	0.62473	0.19452	0.126154	0.292569	0.149259	5.58095e-120
Creld1	0.624474	0.509353	0.330395	0.595591	0.344078	1.91718e-200
Cchcr1	0.624276	0.190136	0.12335	0.282972	0.143825	3.14007e-116
Wwp1	0.623719	0.680052	0.441351	0.711612	0.435718	6.45355e-246
Dctd	0.622952	0.1271	0.0825313	0.195933	0.098191	2.21201e-85
Umps	0.622579	0.287683	0.186853	0.395002	0.217822	3.68014e-138
Jpt2	0.621673	0.149899	0.0974218	0.235272	0.11643	6.25869e-104
Acsl5	0.620982	0.351704	0.228688	0.470544	0.255416	6.79579e-168
Atp6v0d2	0.62068	0.0545963	0.0355075	0.0760167	0.038264	4.61632e-35
Mecr	0.620228	0.313701	0.204084	0.438236	0.236433	5.39539e-157
Ldlrad4	0.619156	0.124273	0.0809084	0.193368	0.0992332	4.63695e-80
Dach1	0.618157	0.231789	0.151011	0.309198	0.164818	2.55815e-117
Uhmk1	0.617838	0.278192	0.181283	0.398708	0.21142	5.01326e-148
Ncapd3	0.61739	0.184735	0.120419	0.251995	0.134743	5.99016e-95
Fam110a	0.616982	0.292649	0.190817	0.402223	0.214248	7.63585e-150
Bcl3	0.615776	0.317587	0.207251	0.406024	0.226159	2.04377e-140
Ruvbl2	0.615259	0.313051	0.204364	0.424553	0.235167	8.67605e-145
Stc1	0.614425	0.600388	0.392167	0.508837	0.300752	1.66728e-167
Mtss1	0.613541	0.170156	0.111212	0.226055	0.127224	9.13201e-76
Noct	0.61193	0.0788329	0.051582	0.121532	0.0643937	6.83541e-48
Bag3	0.61167	0.676124	0.442482	0.719783	0.44681	3.4255e-243
Fetub	0.610017	0.21219	0.139025	0.264063	0.147249	3.05587e-91
Syne1	0.609968	0.254203	0.166556	0.351482	0.182684	4.97359e-139
Dut	0.609371	1.54548	1.01303	0.905264	0.698578	0
Trio	0.608825	0.78506	0.514788	0.760167	0.486637	8.1668e-263
Polr1a	0.607749	0.230848	0.151487	0.34008	0.176133	3.4883e-132
Pcdh7	0.607593	1.49043	0.978152	0.947073	0.741755	0
Slit3	0.606407	0.638247	0.41922	0.624002	0.37728	3.04108e-205
Hras	0.604637	1.7009	1.11857	0.970448	0.805181	0
Ddah1	0.603577	0.889877	0.585646	0.674933	0.446438	2.21745e-225
Lpin3	0.603521	0.0921941	0.0606771	0.151368	0.0743691	3.41377e-69
Spry2	0.602535	0.520314	0.342677	0.564709	0.329636	3.51671e-185
Kctd9	0.602311	0.130382	0.0858824	0.20439	0.104891	1.19692e-83
Trerf1	0.602074	0.372917	0.24568	0.442797	0.249907	2.78017e-148
Dgkh	0.60154	0.112683	0.0742636	0.170087	0.0891834	1.91508e-67
Ybx3	0.601506	1.59599	1.05186	0.950589	0.774659	0
Thop1	0.601176	0.387329	0.255334	0.509787	0.284598	1.35752e-170
Wipf1	0.601033	0.535625	0.353128	0.608704	0.362019	3.02194e-194
Ptgfrn	0.599855	0.449058	0.296298	0.555017	0.313482	1.20651e-182
Nop16	0.599787	0.402765	0.265765	0.521	0.292265	9.64543e-171
Tcf12	0.599518	0.991931	0.654649	0.845401	0.591975	0
Vps36	0.598533	1.64406	1.08578	0.97596	0.795131	0
Akr1b10	0.598441	0.238652	0.157622	0.336089	0.176431	2.77411e-127
Snrpa1	0.5979	0.730231	0.482475	0.723869	0.472791	2.06081e-234
Pfn2	0.597788	0.891932	0.589358	0.812999	0.543214	2.85626e-306
Haus3	0.597349	0.19179	0.126767	0.276321	0.148143	1.54383e-101
Stk17b	0.597312	0.479753	0.317109	0.548651	0.321224	3.65461e-177
Sgpl1	0.597117	0.558475	0.369193	0.648613	0.383756	2.44263e-204
Ctc1	0.596894	0.276528	0.182834	0.385595	0.20673	2.72154e-138
Pde4a	0.596605	0.180109	0.119108	0.264348	0.140028	2.73143e-99
Cnot9	0.59588	0.173223	0.114612	0.268054	0.137721	4.42919e-107
Casp3	0.595877	0.582314	0.385283	0.63778	0.396561	9.94828e-193
Epb41l1	0.595793	0.481997	0.318928	0.586754	0.342366	3.89593e-185
Znrf2	0.594814	0.203323	0.134626	0.308058	0.159309	1.66249e-119
Hnrnpa1	0.593922	1.51174	1.00159	0.946408	0.755155	0
Nab2	0.593756	0.516727	0.342392	0.604048	0.355021	2.32684e-193
Gtf3c1	0.593219	0.623223	0.413111	0.687001	0.415172	8.38971e-217
Bahcc1	0.592794	0.126234	0.0837007	0.191182	0.100797	6.10704e-74
Tfdp1	0.592405	0.579384	0.384268	0.641391	0.393806	1.07385e-196
Iqgap1	0.592079	1.41517	0.938807	0.939567	0.730514	0
Nme1	0.591699	2.24561	1.4901	0.993158	0.897342	0
Fmnl3	0.591342	0.179947	0.119436	0.269954	0.140624	8.59458e-105
Naa25	0.590931	0.239173	0.158791	0.350817	0.181866	3.65148e-134
Casp4	0.590343	0.307152	0.204006	0.371247	0.216407	1.61055e-113
Dcxr	0.590217	1.50083	0.996919	0.935956	0.720241	0
S1pr2	0.589191	0.45668	0.303563	0.564899	0.317948	3.15026e-185
Riox2	0.586397	0.186909	0.124482	0.282212	0.146133	7.65868e-110
Mindy2	0.586211	0.555647	0.370111	0.623907	0.378173	8.63792e-192
Pias3	0.58502	0.339314	0.2262	0.45515	0.250577	3.27748e-151
Cep290	0.583963	0.411351	0.274424	0.503991	0.287129	6.16235e-163
Aspscr1	0.583432	0.629266	0.419956	0.70287	0.430209	1.24721e-217
Ednrb	0.582957	0.243286	0.162416	0.252756	0.145165	3.96029e-83
Actn4	0.582782	1.34706	0.899401	0.933675	0.713169	0
Tmem65	0.582418	0.788594	0.526658	0.780407	0.50763	5.56558e-262
Got2	0.582384	0.774412	0.517198	0.780597	0.503983	1.11113e-261
Rtkn	0.581624	0.29201	0.195125	0.397377	0.219385	5.95482e-132
Bag2	0.581393	0.292796	0.195681	0.400133	0.220502	2.17055e-135
Ttc13	0.581281	0.320333	0.214101	0.448594	0.245738	4.26373e-150
Cinp	0.580369	0.447572	0.299333	0.559103	0.328519	2.43199e-167
Rab23	0.579586	0.25626	0.171478	0.361935	0.19735	3.16003e-123
Nudt9	0.578521	0.804295	0.538596	0.790289	0.521179	3.80691e-260
Lcn2	0.57728	0.464526	0.311337	0.343025	0.226606	3.76412e-72
Taldo1	0.577168	1.55184	1.04016	0.963132	0.786198	0
Traf3	0.576403	0.16881	0.11321	0.262258	0.136306	1.29861e-100
Imp3	0.576292	1.59987	1.07301	0.974724	0.804511	0
Zswim6	0.576158	0.306382	0.205505	0.413531	0.228839	5.81716e-136
Fam131a	0.575683	0.0693089	0.0465041	0.108134	0.0550882	1.9048e-46
Atad5	0.575664	0.0888192	0.0595957	0.133029	0.0703491	7.37746e-52
Cnp	0.575602	0.252162	0.169202	0.362695	0.191394	2.38808e-131
Slc39a10	0.575182	0.522869	0.350951	0.574116	0.346162	6.16315e-169
Ormdl1	0.575005	0.106542	0.07152	0.171038	0.0870245	1.82765e-71
Nup155	0.574824	0.156517	0.105081	0.240498	0.12648	2.32224e-91
Nup50	0.57468	0.469325	0.315121	0.587799	0.340654	1.77072e-179
Fancm	0.574383	0.134708	0.090466	0.207336	0.107496	1.98211e-82
Card19	0.573925	0.801896	0.538703	0.753991	0.516489	2.40301e-250
Adsl	0.573398	0.238642	0.160375	0.350912	0.186407	9.19591e-126
Atp1b1	0.573106	0.410026	0.275607	0.43225	0.263753	3.65288e-121
Grem1	0.57285	1.77548	1.19363	0.880939	0.667833	0
Ntn4	0.572379	0.138273	0.0929896	0.191087	0.109506	8.44448e-61
Adcy2	0.571769	0.092848	0.0624673	0.150133	0.0774957	1.76804e-61
Ndst1	0.571361	0.885058	0.595628	0.820506	0.557135	5.81501e-295
C1galt1	0.57128	0.525284	0.353526	0.602908	0.352341	1.37283e-187
Fryl	0.571239	0.27808	0.187159	0.388826	0.212387	4.89857e-131
Katnal1	0.571163	0.34794	0.234189	0.465032	0.26018	8.49984e-147
Rnf149	0.570341	0.308512	0.20777	0.418567	0.233604	1.06277e-134
Samd4	0.569679	0.560052	0.377344	0.631319	0.380928	2.55567e-186
Ahi1	0.569469	0.463657	0.312442	0.551976	0.329636	1.79453e-157
Galnt1	0.569437	0.800117	0.539183	0.774135	0.518127	7.74422e-248
Abcf2	0.56925	0.636751	0.429149	0.711422	0.436239	2.2005e-212
Akirin1	0.568409	0.507782	0.342428	0.604618	0.361944	1.45527e-176
Tdrd7	0.5682	0.253212	0.170781	0.366306	0.198541	4.03761e-125
Zfand2a	0.568166	0.139875	0.0943422	0.218643	0.114122	1.52207e-84
Pcyox1l	0.567959	0.148582	0.100229	0.224249	0.118142	7.05971e-85
Msi2	0.567839	0.382389	0.25797	0.470544	0.272389	2.28873e-143
Selenoh	0.567095	1.23902	0.836307	0.851007	0.664632	2.28853e-254
Slc25a17	0.566334	0.857412	0.579037	0.804067	0.54381	1.57273e-247
Ripor1	0.566255	0.465432	0.314338	0.576682	0.337304	2.22702e-168
Capn5	0.565783	0.124861	0.0843547	0.198214	0.101169	7.43563e-81
Casp8	0.565575	0.422082	0.285195	0.532022	0.307898	2.07204e-158
Ier5	0.564916	0.815146	0.551035	0.762353	0.501154	8.54054e-238
Immp2l	0.563261	0.142904	0.0967133	0.223584	0.114866	1.81325e-89
Eno1	0.562882	2.08378	1.41061	0.986507	0.891312	0
Piezo1	0.562755	0.829218	0.561387	0.806727	0.525422	1.86072e-263
Rnaseh2a	0.562736	0.391044	0.264744	0.488217	0.289958	4.38234e-141
Prkar1b	0.562101	0.104522	0.0707946	0.156975	0.0814412	4.02223e-63
Sinhcaf	0.562008	0.0690396	0.0467646	0.11165	0.056056	1.69756e-49
Lsm11	0.561106	0.118623	0.0804009	0.191182	0.0981166	2.85036e-77
Plin2	0.56091	1.41608	0.959924	0.938807	0.743542	0
Rfwd3	0.560684	0.163616	0.110929	0.246769	0.13117	5.75045e-90
Nup35	0.56056	0.325363	0.220609	0.432345	0.248716	2.36509e-129
Farsb	0.559514	0.444271	0.301452	0.560813	0.326807	2.08518e-163
Stam	0.558918	0.372841	0.253089	0.497434	0.278865	1.25726e-153
Otud7b	0.558564	0.492379	0.334314	0.597491	0.355989	2.28109e-171
Pi4k2b	0.558391	0.350274	0.237857	0.465507	0.264498	2.71884e-141
Neo1	0.557252	0.467721	0.317861	0.543995	0.338271	9.19711e-144
Fbl	0.556898	0.803023	0.545864	0.790384	0.524901	4.3034e-249
Slc25a5	0.555137	1.72722	1.17553	0.978145	0.823941	0
Homer3	0.554076	0.551781	0.375814	0.637875	0.388149	2.63064e-179
Ugdh	0.553388	1.05569	0.719369	0.866021	0.62272	0
Dcbld2	0.553094	0.233663	0.159254	0.337229	0.185513	3.73441e-111
Adipor2	0.552904	0.55101	0.375594	0.634455	0.390307	3.14195e-176
Aven	0.551658	0.352899	0.24076	0.482421	0.269634	5.26903e-148
Kpna1	0.550964	0.347036	0.236874	0.474344	0.264423	7.76503e-146
Synpo	0.550791	0.404407	0.276067	0.500095	0.296062	1.35116e-140
Tarbp2	0.550181	0.333105	0.227489	0.459426	0.255416	1.39563e-142
Gse1	0.549987	0.146201	0.099859	0.222349	0.114345	3.76071e-88
Baz1a	0.549095	0.189405	0.129449	0.27461	0.145537	6.52314e-101
Gfra1	0.548963	0.179672	0.122808	0.233086	0.118961	4.42995e-97
Mcph1	0.548846	0.179983	0.123031	0.271665	0.143974	8.79141e-99
Ecscr	0.54851	0.13805	0.0943887	0.158115	0.0980421	3.60159e-40
Nfe2l2	0.547577	1.81558	1.24216	0.986032	0.860195	0
Tinf2	0.547571	0.107182	0.0733311	0.174933	0.0897045	5.61337e-71
Gsr	0.545597	0.3988	0.273221	0.493729	0.292861	6.40679e-140
Cdkl2	0.545544	0.120229	0.0823729	0.192512	0.102807	1.42677e-70
Slco3a1	0.545237	0.234031	0.160376	0.327157	0.182982	4.10759e-104
Cpt1c	0.545168	0.677476	0.464282	0.723109	0.45686	6.50351e-198
Itsn2	0.544792	0.347586	0.238267	0.466838	0.262339	4.93987e-141
Trp53inp1	0.544614	0.773675	0.530412	0.718453	0.46892	1.14309e-199
Rbpms	0.544606	0.493751	0.338505	0.540289	0.334921	3.13854e-145
Klhl21	0.54457	0.142996	0.0980375	0.218073	0.116281	2.31559e-79
Hpcal1	0.544567	0.635975	0.436022	0.693843	0.436462	7.59795e-186
Ldha	0.543692	2.39192	1.64089	0.995914	0.921909	0
Eef1e1	0.542748	0.481771	0.330717	0.59027	0.353607	1.28197e-160
Cast	0.542408	1.57886	1.08408	0.963512	0.793791	0
BC028528	0.542267	0.212154	0.145684	0.275656	0.158565	2.01499e-83
Ing1	0.541544	1.03511	0.711156	0.858704	0.629718	4.92074e-300
Gas2l1	0.540928	0.509007	0.349855	0.617636	0.375121	1.17187e-167
Tmem183a	0.540659	0.435157	0.299151	0.557773	0.328222	5.96001e-154
Tmbim1	0.540425	0.602615	0.414339	0.683485	0.419117	4.37362e-183
Eftud2	0.540388	0.502688	0.345641	0.61241	0.370133	3.82079e-164
Nr1d1	0.540018	0.275108	0.189209	0.368206	0.210526	8.33545e-110
Wwtr1	0.539381	1.20536	0.829365	0.903554	0.691283	0
Grk6	0.539239	0.245989	0.169273	0.352908	0.19333	7.97481e-115
Fbxw9	0.538782	0.616957	0.424683	0.678069	0.425296	1.13691e-178
Agfg1	0.538586	0.626722	0.431464	0.692227	0.440631	1.35977e-179
Egfl7	0.538234	0.202141	0.139197	0.29428	0.161915	5.76552e-97
E2f6	0.538148	0.178883	0.123189	0.272425	0.146133	7.30535e-96
Hmox1	0.537643	1.83267	1.26252	0.960756	0.821187	0
Slc8b1	0.537438	0.0646953	0.0445746	0.103668	0.0533016	1.49305e-43
Irx3	0.5373	0.278135	0.191651	0.294755	0.19467	4.50103e-60
Map3k14	0.537225	0.145568	0.10031	0.212847	0.115685	3.64154e-74
Tulp4	0.536992	1.19339	0.822492	0.903839	0.681679	0
Dctpp1	0.536902	0.604545	0.416683	0.616971	0.418	3.27467e-141
Bcar1	0.536407	0.313611	0.21623	0.432345	0.244919	1.99052e-128
Idh3a	0.536127	0.578208	0.398743	0.660205	0.414799	4.65047e-173
Mettl6	0.535525	0.386355	0.266549	0.503801	0.291968	5.73722e-140
Sf3b4	0.53503	0.729684	0.503588	0.751805	0.494826	8.3823e-209
Trmt10a	0.534041	0.231429	0.159829	0.338274	0.184992	3.34376e-110
Nhp2	0.533992	1.09863	0.758762	0.871627	0.649297	0
Ccdc77	0.533815	0.123135	0.0850526	0.18301	0.0996054	6.53462e-64
Hipk1	0.533508	0.449504	0.31055	0.560338	0.335443	9.82528e-149
Ak1	0.532459	1.29857	0.897798	0.93282	0.691134	0
Eif4ebp1	0.532209	1.99756	1.3813	0.987362	0.860046	0
Plscr1	0.531511	0.169589	0.117327	0.245724	0.136753	2.32228e-79
Tmpo	0.530887	0.52328	0.362178	0.487267	0.348396	4.05706e-90
Adam9	0.530871	0.706969	0.489319	0.740783	0.476439	5.20919e-199
Gpr137b	0.530622	0.164453	0.113843	0.243729	0.136976	2.63062e-77
Lhfpl2	0.530595	0.414772	0.287134	0.491353	0.283853	2.96289e-143
Ier3	0.530022	1.07677	0.745714	0.819745	0.584084	4.50835e-259
Fbxl5	0.529978	0.681507	0.471988	0.724629	0.470483	1.74724e-188
Cab39l	0.52939	0.554579	0.384239	0.642531	0.40006	5.99575e-168
Topbp1	0.529354	0.41747	0.289251	0.480806	0.304846	8.17928e-117
B4galt1	0.528759	0.926724	0.642359	0.825922	0.577682	8.80471e-242
Mgst3	0.528612	1.22217	0.847235	0.844451	0.676692	1.43194e-294
Ociad2	0.528339	0.417717	0.289625	0.497529	0.30373	2.80631e-129
Inpp5f	0.528124	0.309696	0.214761	0.420848	0.238889	7.17688e-124
Pkd2	0.527348	1.15481	0.80124	0.869441	0.65622	5.08954e-282
Metrn	0.52701	0.334799	0.232347	0.443368	0.25482	3.83962e-127
Anapc15	0.526209	0.410166	0.28481	0.512828	0.307452	6.4868e-135
Impa1	0.525062	0.569349	0.395658	0.662296	0.407057	1.95285e-170
Pigf	0.524883	0.30819	0.214196	0.417047	0.24075	7.75327e-117
Nup205	0.524488	0.16957	0.117886	0.257887	0.142559	1.1113e-83
Nlk	0.523482	0.153463	0.106762	0.236222	0.127522	4.9187e-82
Socs3	0.523463	0.833422	0.579812	0.750475	0.502866	4.7621e-198
Rap1gds1	0.523201	0.310367	0.215961	0.431965	0.244919	3.40315e-126
Timm50	0.52269	0.587126	0.408683	0.6603	0.416735	5.00221e-163
Megf8	0.522549	0.334929	0.233158	0.461422	0.264275	5.076e-130
Nop56	0.521498	0.577182	0.402093	0.625048	0.405271	3.27303e-149
Plxna2	0.521076	0.326296	0.22738	0.389111	0.227127	3.67431e-113
Osbpl9	0.520814	0.756169	0.527034	0.765108	0.508822	1.07167e-207
Ppl	0.519762	0.357049	0.249037	0.375903	0.227499	1.66241e-100
Gxylt1	0.518746	0.32838	0.229202	0.439282	0.253629	2.16436e-121
Prpf31	0.517774	0.576097	0.402374	0.666762	0.416512	2.33703e-164
Ddx21	0.51721	0.615972	0.430393	0.667047	0.429316	1.63818e-165
Diaph2	0.516909	0.411049	0.287268	0.506937	0.304176	1.02597e-131
Cavin1	0.516902	2.06729	1.44477	0.982421	0.887218	0
Tnpo2	0.51653	0.410245	0.286783	0.526511	0.311323	4.1817e-137
Galm	0.515877	0.283535	0.198295	0.38588	0.219981	1.77882e-112
Ppp4r1	0.515042	0.335092	0.234488	0.456575	0.264498	2.36744e-124
Cib1	0.515042	0.780281	0.546019	0.777081	0.524082	6.87675e-209
Nudt5	0.514599	0.502049	0.351428	0.591505	0.36924	1.89302e-143
Map4k4	0.513595	1.5707	1.10023	0.950494	0.792005	0
Lsm4	0.513325	1.2097	0.847523	0.908875	0.699248	0
Eif4e	0.51226	1.11088	0.778865	0.896617	0.6723	0
Kcnk2	0.512253	0.193357	0.135568	0.261973	0.141592	1.98685e-92
Mir100hg	0.511665	1.06624	0.747876	0.824876	0.593017	6.18878e-248
Nab1	0.511558	0.678717	0.476096	0.715602	0.462592	2.65698e-179
Homer1	0.511479	0.197272	0.138387	0.29694	0.162808	8.83132e-96
Piga	0.511024	0.0880973	0.06182	0.142436	0.0743691	1.20017e-55
Sfxn1	0.510753	0.794358	0.557525	0.783067	0.526762	7.75745e-207
Plec	0.510598	2.17522	1.52685	0.986222	0.902553	0
Sdc1	0.51042	1.02425	0.719041	0.846066	0.61602	1.85565e-265
Snhg15	0.510307	0.527532	0.370366	0.623622	0.374302	3.10347e-160
Stmn1	0.510222	0.531527	0.373193	0.399373	0.321596	2.62503e-48
Pid1	0.510199	0.75656	0.5312	0.722159	0.466314	1.28108e-196
Slc7a5	0.510059	0.0947734	0.0665492	0.153934	0.0768257	6.25993e-67
Extl3	0.509625	0.401788	0.282218	0.517294	0.307898	1.54359e-133
Dock5	0.509145	0.208709	0.146647	0.307298	0.169657	5.95345e-98
Glipr2	0.509004	0.754228	0.530002	0.740973	0.496687	3.18046e-189
Tcirg1	0.508023	0.223489	0.157154	0.327062	0.17859	2.12549e-105
Gemin6	0.507974	0.162969	0.114602	0.243919	0.135785	5.25453e-78
Thumpd3	0.506608	0.265396	0.186806	0.383884	0.215067	3.17852e-113
Akap1	0.506305	0.215141	0.151464	0.309958	0.17725	1.46054e-89
Ece1	0.505889	0.70171	0.494162	0.723489	0.473759	2.33736e-175
Ciapin1	0.505816	0.627178	0.441697	0.695078	0.445842	1.66585e-169
Mob3a	0.505353	0.279761	0.197088	0.398328	0.223628	1.63093e-117
Stard13	0.504792	0.113158	0.0797495	0.176359	0.096851	7.78727e-60
Vangl1	0.504182	0.458419	0.323213	0.557393	0.335666	3.9589e-139
Nr2f2	0.504069	1.22074	0.86076	0.873147	0.679521	9.46191e-291
Gipc1	0.503337	0.620581	0.437803	0.692322	0.443981	2.1252e-167
Bhlhe40	0.50224	0.2267	0.160053	0.312429	0.178516	9.37116e-92
Rnf141	0.502152	0.192186	0.135693	0.2939	0.160426	1.69786e-95
Parp11	0.502063	0.161497	0.114032	0.236127	0.134445	2.2175e-71
Golm1	0.501673	0.403647	0.285091	0.515583	0.305888	1.15413e-131
Bop1	0.501315	0.341675	0.241381	0.467123	0.274027	1.07652e-120
Car5b	0.501215	0.232987	0.164608	0.33989	0.190129	4.97562e-103
Pde10a	0.500552	0.0879249	0.0621485	0.137495	0.0720613	2.5525e-53
Lin54	0.498664	0.136559	0.0966512	0.20553	0.114941	1.18733e-65
Lsm2	0.498068	0.998726	0.707152	0.823166	0.618849	3.67912e-215
Traf4	0.497889	0.523967	0.371043	0.61317	0.376982	2.77521e-148
Rasal2	0.49736	0.262732	0.18612	0.366211	0.209186	5.54262e-105
Cdc34	0.497109	1.15493	0.818296	0.90992	0.678181	0
Pdgfc	0.496631	0.156778	0.111118	0.230901	0.129904	1.31059e-72
Cd151	0.496605	0.909696	0.644768	0.812904	0.571875	4.9475e-226
Lclat1	0.495488	0.221817	0.157339	0.325922	0.17859	1.7545e-103
Wdr46	0.495306	0.300794	0.213387	0.424078	0.244547	1.96367e-112
Sav1	0.495035	0.584453	0.414695	0.665716	0.427455	9.41564e-154
Cd14	0.494925	0.12654	0.0897925	0.194603	0.106156	7.19547e-66
Rnd2	0.494356	0.183696	0.130402	0.263588	0.150301	7.95738e-78
Pno1	0.494347	0.385373	0.27357	0.508267	0.302166	7.15441e-127
Espn	0.493996	0.0809361	0.0574692	0.110224	0.0664781	5.75495e-30
Lpin1	0.493585	0.413751	0.29387	0.488312	0.307452	5.63709e-111
Klhdc10	0.493239	0.310563	0.220633	0.423128	0.248269	5.22912e-110
Src	0.492614	0.247732	0.176072	0.36222	0.202561	1.4583e-106
Tufm	0.492578	0.450443	0.320154	0.56927	0.343557	2.29674e-136
Suox	0.491229	0.164129	0.116765	0.24943	0.138093	8.42582e-80
Eif2b3	0.491038	0.391691	0.278693	0.512543	0.306335	3.37923e-125
Tnfaip1	0.491017	0.664725	0.472967	0.713797	0.468027	4.25944e-165
Elmo2	0.490678	0.345944	0.246205	0.459141	0.272091	2.04351e-116
Zdhhc21	0.490493	0.204155	0.145314	0.302071	0.167126	2.41007e-95
Rad21	0.490324	0.689485	0.490821	0.673413	0.470409	2.91174e-129
Ptprg	0.49025	0.475647	0.338614	0.572311	0.357999	2.42646e-131
Dcakd	0.490192	0.570646	0.40626	0.629513	0.413162	1.9471e-127
Ppp2r5d	0.489128	0.357729	0.254866	0.474629	0.281992	1.635e-118
Nsun2	0.488446	0.488573	0.348251	0.596066	0.370878	3.20373e-135
Psmc3ip	0.487382	0.181435	0.129421	0.259502	0.148887	2.56691e-75
Gramd1b	0.486308	0.0802275	0.0572704	0.123622	0.0665525	2.92261e-45
Myo1c	0.485913	0.886031	0.632666	0.808533	0.571131	2.529e-209
Rnf126	0.485641	0.514914	0.367741	0.622482	0.383905	1.18268e-141
Casp1	0.485631	0.205596	0.146833	0.197739	0.134743	2.17941e-35
Tubg1	0.483873	0.417022	0.298194	0.49924	0.319661	7.60636e-106
Hmgb2	0.483821	0.604843	0.432512	0.434626	0.379141	3.52208e-25
Csf1	0.483767	1.79725	1.28523	0.949259	0.8261	0
Slc41a2	0.483327	0.168371	0.12044	0.264348	0.146952	1.66788e-82
Tuba1c	0.483205	1.24299	0.889219	0.863455	0.682573	1.73719e-258
Tomm40	0.483059	0.825172	0.590377	0.797415	0.557657	1.02324e-199
Scx	0.482979	0.196003	0.14024	0.244964	0.14174	1.92351e-74
Lsm8	0.482564	0.772679	0.55301	0.750475	0.523412	6.06498e-173
Noc2l	0.481885	0.296705	0.212453	0.416002	0.238889	4.10965e-111
Arl8a	0.481152	1.12323	0.804691	0.901463	0.677957	4.51416e-306
Agpat2	0.480941	0.684614	0.490533	0.715507	0.483957	2.91955e-156
Ndrg4	0.480585	0.124858	0.0894845	0.190897	0.105338	8.42996e-63
Phlda3	0.480559	2.33137	1.6709	0.996484	0.913497	0
Cycs	0.480441	1.62838	1.16716	0.959426	0.815529	0
Crispld2	0.48017	0.0858861	0.0615711	0.0892246	0.0616392	2.82025e-15
Ttf2	0.48003	0.142983	0.102514	0.222539	0.122385	4.04203e-72
Enc1	0.47989	0.394359	0.282768	0.492208	0.283779	2.83534e-135
Ccne1	0.479856	0.244319	0.175189	0.280502	0.1873	8.18356e-52
Pnpla2	0.479802	0.256272	0.183766	0.370487	0.210824	4.60266e-104
Dnajb1	0.479687	0.475993	0.34135	0.578487	0.358222	6.18576e-133
Ergic1	0.479383	0.864877	0.620363	0.816895	0.576937	6.39255e-209
Pnpt1	0.479119	0.14359	0.103014	0.220544	0.120971	3.0975e-72
Plp2	0.479087	0.870495	0.62452	0.790384	0.55989	8.99129e-199
Cdca4	0.478821	0.216537	0.155379	0.310908	0.179558	3.79251e-86
Fxn	0.47833	0.190649	0.136849	0.286488	0.160798	4.33952e-86
Anp32e	0.478199	0.466715	0.335042	0.532972	0.345567	3.45599e-111
Cers2	0.477776	0.893554	0.641647	0.8187	0.588848	1.84347e-214
Abcc1	0.477335	0.342293	0.24587	0.457716	0.268369	1.47372e-115
Eif3b	0.477318	1.00584	0.722509	0.867256	0.640066	8.98065e-265
Eri1	0.476381	0.335959	0.24148	0.419897	0.262488	7.67774e-94
Ndfip2	0.476028	0.665724	0.478625	0.72748	0.477406	4.35836e-158
Irak1	0.47498	0.678925	0.488471	0.737267	0.483213	6.63726e-162
Rrs1	0.474905	0.223772	0.161007	0.327157	0.185216	2.73866e-93
Il7	0.47415	0.153407	0.110436	0.212752	0.117397	6.88408e-70
Stip1	0.473975	0.999896	0.719903	0.860604	0.632472	4.03835e-247
S100a10	0.473633	2.8147	2.027	0.996104	0.92578	0
Traf3ip1	0.47347	0.177703	0.127987	0.267294	0.146952	4.28564e-85
Tmx1	0.473127	0.703514	0.506812	0.736412	0.49438	2.51714e-161
Serpinb6a	0.473026	2.73301	1.969	0.995629	0.962108	0
Ywhah	0.472471	1.23392	0.889321	0.890631	0.709149	0
Rcan1	0.472328	0.346123	0.249486	0.395097	0.247971	2.09934e-88
Nans	0.472129	0.633169	0.456451	0.694888	0.455967	2.4881e-150
Ipo8	0.471186	0.28263	0.203881	0.399088	0.230701	3.0678e-105
Tmem43	0.470518	0.61996	0.447429	0.68339	0.447406	3.73287e-143
Ran	0.470091	2.40478	1.73606	0.994489	0.941041	0
Arf3	0.469911	0.763001	0.550894	0.77366	0.529591	1.30729e-175
Asap2	0.469778	0.186504	0.13467	0.276226	0.154619	6.24944e-84
Inpp1	0.469712	0.297621	0.214915	0.405169	0.240155	2.26063e-99
Agtr2	0.468262	1.18229	0.8546	0.689757	0.500112	5.80461e-156
Il13ra1	0.467294	0.63893	0.462151	0.680825	0.447703	1.42325e-141
Pcdh9	0.467242	0.300436	0.217319	0.362315	0.221767	3.36661e-87
Cox6b2	0.46713	0.744846	0.538823	0.593025	0.39738	1.4028e-131
Emx2	0.466256	0.312814	0.226427	0.349012	0.217226	2.01145e-80
Spr	0.466224	1.01713	0.736254	0.875143	0.645649	7.50627e-253
Comtd1	0.46616	0.460824	0.333585	0.559103	0.352416	2.62012e-119
Tomm70a	0.46586	0.606344	0.439017	0.682155	0.44748	9.55701e-140
Klhdc4	0.465498	0.302772	0.219274	0.423793	0.248641	1.2592e-105
Rcl1	0.465257	0.118974	0.0861778	0.187191	0.101615	6.28495e-64
Memo1	0.465023	0.563514	0.408243	0.659065	0.424328	5.16963e-135
Otud4	0.464969	0.255604	0.185182	0.369916	0.21276	8.60294e-98
Uchl5	0.464328	0.332147	0.240743	0.442227	0.269932	1.00321e-100
Dhx15	0.46363	0.8775	0.636328	0.822216	0.586168	3.08331e-203
Nop9	0.463354	0.278129	0.201726	0.399848	0.231445	1.52973e-103
Nudt1	0.463039	0.30069	0.218138	0.418947	0.246259	7.97371e-104
Dennd2a	0.463016	0.193937	0.140695	0.282022	0.159309	2.04856e-82
Ccdc88a	0.462385	1.15711	0.839816	0.874952	0.688528	3.57304e-282
Gatad2a	0.462033	0.600784	0.436146	0.682725	0.445172	2.19081e-139
Slc39a6	0.461054	0.5455	0.396282	0.63816	0.404303	1.54318e-131
Camsap2	0.460777	0.327013	0.237606	0.441562	0.263083	5.2713e-105
Tmem184b	0.460503	0.311471	0.226356	0.435766	0.255416	2.66976e-107
Camk2d	0.460155	1.24015	0.901474	0.911536	0.722549	0
Pon2	0.459971	0.55858	0.406088	0.651938	0.415693	1.02896e-133
Spry1	0.459672	0.134134	0.0975356	0.164196	0.103477	3.27409e-37
Tpst2	0.459562	0.53588	0.389696	0.632079	0.403558	5.80736e-129
Srpk1	0.459416	0.855476	0.622171	0.804827	0.573364	2.16157e-188
Mrs2	0.458596	0.184415	0.134198	0.285538	0.158193	1.39977e-86
Ntn1	0.458441	0.331066	0.240941	0.404124	0.238368	3.9175e-103
Ier5l	0.45838	1.27676	0.929231	0.921513	0.719348	0
Smurf2	0.457437	0.465053	0.338688	0.556157	0.356138	1.66882e-112
Nelfcd	0.456781	0.283646	0.206668	0.401463	0.230626	5.31896e-105
Rnf11	0.456489	1.72759	1.25899	0.960376	0.837564	0
Plekha3	0.455842	0.564546	0.411602	0.653744	0.422393	5.63436e-130
Mt1	0.455287	3.28292	2.39444	0.997815	0.93851	0
Sdcbp	0.455017	1.44704	1.05562	0.961897	0.790814	0
Nup62	0.454149	0.292978	0.213856	0.407355	0.239038	7.6322e-102
Nsf	0.453688	0.32699	0.23876	0.444983	0.266582	6.90453e-104
Cspg4	0.453257	0.152603	0.11146	0.220639	0.127001	7.24301e-64
Itpripl2	0.453189	0.917846	0.670419	0.825827	0.599494	6.5215e-192
Stx2	0.453011	0.33299	0.243255	0.451159	0.268071	3.45887e-106
a	0.451933	0.0985728	0.0720629	0.109084	0.0616392	3.9137e-36
Tpm4	0.450267	1.70502	1.24792	0.964557	0.821336	0
Tet2	0.449984	0.221312	0.162012	0.301881	0.176952	1.91148e-78
Pdcd6ip	0.449574	1.31207	0.960777	0.944888	0.751731	0
Cep295	0.449544	0.175704	0.128663	0.258077	0.148962	3.76412e-72
Kif2a	0.449047	0.862459	0.631774	0.804827	0.583042	1.24273e-175
Rfx7	0.448632	0.386242	0.283014	0.488122	0.299189	2.70799e-106
Col5a3	0.4484	0.25884	0.189692	0.324021	0.190873	1.48475e-85
Dap	0.448357	2.41592	1.77057	0.996484	0.950495	0
Eef1akmt4	0.448196	0.171309	0.125562	0.264443	0.149259	4.14525e-77
Dcaf7	0.448002	0.490881	0.359844	0.603193	0.382193	7.14644e-119
Ddhd1	0.447245	0.142193	0.10429	0.219593	0.122683	6.74295e-68
Cdk17	0.446958	0.132719	0.0973609	0.211992	0.117472	2.83993e-67
Ppm1l	0.446822	0.447572	0.328364	0.52423	0.335219	2.2899e-106
Las1l	0.446331	0.415476	0.304921	0.525466	0.328668	9.74285e-108
Nasp	0.446279	0.536893	0.394044	0.583713	0.391126	2.05873e-106
Mnd1	0.446268	0.182441	0.133901	0.266249	0.156331	6.29622e-70
Glud1	0.445446	1.33124	0.977609	0.933675	0.7626	0
Cdc27	0.44491	0.413144	0.303508	0.532117	0.327552	6.10414e-112
Nudt4	0.444875	1.43314	1.05285	0.912581	0.740788	1.58462e-265
Dhx58os	0.44413	0.301448	0.221573	0.377613	0.229435	1.17881e-87
Aimp2	0.444015	0.446435	0.328168	0.556823	0.350927	2.39273e-111
Rhbdf1	0.4438	0.36024	0.264847	0.481661	0.293531	5.07702e-104
Nckap1	0.443368	0.845755	0.621982	0.808723	0.574257	3.46324e-173
Nif3l1	0.443025	0.219998	0.161828	0.330103	0.190352	2.86928e-87
Tle3	0.443021	0.182065	0.133926	0.269574	0.154098	4.12308e-76
Rasa4	0.443011	0.267174	0.196533	0.36298	0.217003	1.67571e-87
Ikbkg	0.442863	0.282334	0.207705	0.392056	0.232859	7.94795e-95
Bfsp1	0.442836	0.0690206	0.0507776	0.0922653	0.0530782	7.54515e-29
Ftsj3	0.442485	0.506433	0.372667	0.608134	0.386883	4.17061e-119
Frrs1	0.442403	0.348902	0.256759	0.458381	0.27894	4.45414e-101
S100a13	0.44218	2.20336	1.62172	0.986317	0.926003	0
Ccbe1	0.441647	0.261044	0.192205	0.333428	0.198839	1.34478e-83
Igf2bp1	0.441333	0.15622	0.115049	0.232136	0.134222	1.41587e-64
Trim59	0.440227	0.193496	0.14261	0.225675	0.151046	1.08458e-40
Gpi1	0.440003	1.64763	1.21452	0.979	0.850368	0
Ctxn1	0.439945	0.736111	0.542634	0.70458	0.482469	1.11748e-135
Usp50	0.438797	0.228818	0.168811	0.34179	0.198541	4.76494e-87
Acp6	0.438724	0.165521	0.122119	0.24886	0.142038	8.84543e-71
Esd	0.438412	2.83845	2.09462	0.99924	0.98526	0
Fam216a	0.438072	0.65974	0.486967	0.709806	0.477034	1.07444e-132
Exosc8	0.437379	0.409357	0.3023	0.49867	0.322787	1.30921e-94
Nup133	0.437319	0.176943	0.130674	0.267579	0.152535	2.20169e-75
Medag	0.437163	1.29875	0.959237	0.888826	0.7023	7.92711e-255
Dgkd	0.437045	0.134266	0.0991749	0.209141	0.116727	3.1686e-64
Homer2	0.436734	0.0700006	0.0517168	0.114785	0.0640214	4.94707e-38
Zw10	0.436729	0.172795	0.127662	0.262163	0.148292	2.43662e-75
Gnl3l	0.435781	0.336385	0.248688	0.461897	0.275516	7.53471e-104
Nup85	0.43578	0.191383	0.141488	0.282307	0.165786	9.14066e-73
Rpa2	0.434787	0.187614	0.138797	0.256556	0.158416	6.454e-59
Zc3h12a	0.434434	0.0704884	0.0521603	0.11431	0.0635003	2.84599e-38
Kpnb1	0.434142	0.880188	0.651457	0.803782	0.590039	1.39382e-170
Pik3r3	0.434025	0.284673	0.210713	0.389301	0.233529	5.96499e-91
Ifi202b	0.433748	1.70755	1.26416	0.943748	0.758729	0
Klf4	0.433096	0.90849	0.672892	0.748005	0.497581	2.70786e-168
Itpr2	0.432646	0.331041	0.245268	0.435101	0.265763	3.90745e-95
Orc2	0.432564	0.299067	0.221592	0.412961	0.250577	9.07496e-90
Grtp1	0.432531	0.11834	0.0876852	0.179209	0.100797	2.22442e-55
Miip	0.431636	0.1011	0.0749576	0.156689	0.0903	4.63498e-46
Ehd1	0.431146	1.02356	0.759148	0.872102	0.653093	1.28056e-217
Ncaph2	0.430594	0.496836	0.368631	0.583998	0.386436	7.53601e-104
Bloc1s6	0.430422	0.406876	0.30192	0.529837	0.329487	4.45966e-104
Dennd5b	0.43028	0.126991	0.0942425	0.182725	0.107348	3.33228e-50
Stox2	0.430017	0.420466	0.312092	0.482136	0.314449	5.87413e-90
Atp1b3	0.429406	1.30863	0.971744	0.929209	0.745775	0
Phb	0.429308	0.691659	0.513638	0.743158	0.505769	7.32165e-135
E2f5	0.428739	0.19652	0.145997	0.29561	0.169657	8.43131e-80
Dis3	0.428645	0.222385	0.165223	0.324306	0.187151	3.58582e-85
Ptgr1	0.428264	0.678025	0.503878	0.715127	0.484181	1.42871e-126
Nup107	0.42762	0.0954237	0.0709463	0.154029	0.0853123	1.56541e-50
Kif1c	0.427399	0.578597	0.430245	0.662106	0.4381	1.28003e-117
Nfatc1	0.425482	0.0847712	0.0631198	0.139396	0.0793568	8.48818e-43
Fzr1	0.424712	0.289836	0.215924	0.387875	0.242686	1.58035e-78
Ptbp1	0.424471	0.728466	0.542789	0.754656	0.52304	4.87638e-134
Hdac4	0.42422	0.296219	0.220755	0.398423	0.240155	3.53978e-90
Nudt3	0.424091	0.680601	0.507257	0.736697	0.497208	2.29619e-131
Commd4	0.423969	0.932418	0.694997	0.852052	0.623911	1.64615e-182
Mdc1	0.423758	0.131482	0.0980173	0.199829	0.115462	7.45704e-56
Nt5e	0.423642	0.111382	0.08304	0.161916	0.09231	2.66964e-49
Cln8	0.423491	0.239545	0.178609	0.346066	0.20673	9.43083e-81
Itpa	0.422819	0.472743	0.35265	0.588464	0.373111	2.24841e-108
Imp4	0.422425	0.366274	0.273302	0.491258	0.299412	3.32644e-101
Nfkbia	0.422061	0.535102	0.399377	0.586659	0.386585	5.14225e-102
Cep170	0.421786	0.672881	0.502305	0.711707	0.485074	2.05583e-125
Trim2	0.421192	0.511126	0.381713	0.58913	0.38867	8.5171e-105
Gfpt2	0.421121	0.193142	0.144247	0.262163	0.161021	1.17847e-59
Csgalnact2	0.420998	0.360278	0.269095	0.481091	0.293159	3.3172e-101
E2f4	0.42068	0.319319	0.238554	0.435576	0.267401	5.83828e-90
Cttnbp2nl	0.420309	0.386807	0.289047	0.488312	0.30909	9.19262e-92
Rcc2	0.420239	0.656905	0.490905	0.708001	0.480161	3.56566e-124
Vamp4	0.419994	0.677585	0.506446	0.707241	0.493858	7.03654e-117
Fam13b	0.419829	0.3798	0.283905	0.47881	0.297923	2.00296e-95
Camk2n2	0.419812	0.243493	0.182016	0.346541	0.208665	6.62175e-80
Upf3b	0.419282	0.612699	0.458175	0.683485	0.451798	8.36461e-122
Mgmt	0.418998	0.854864	0.63939	0.792474	0.563389	2.61905e-154
Cdkn2a	0.417843	2.95551	2.21233	0.994014	0.923323	0
Bcr	0.417281	0.250286	0.187423	0.364025	0.214844	1.7864e-86
Irgm1	0.417252	0.204933	0.153464	0.272805	0.174942	1.37646e-52
Sox5	0.417071	0.26545	0.198807	0.301976	0.19132	1.61593e-66
Coq7	0.417036	0.599896	0.449299	0.676644	0.451351	4.55728e-115
Phldb1	0.416798	0.255678	0.191525	0.362505	0.21544	1.65375e-86
Ostf1	0.415394	1.53388	1.15013	0.954485	0.824685	0
Pak1ip1	0.414662	0.755475	0.566754	0.770429	0.540535	8.3976e-134
Aebp2	0.414302	0.417737	0.313463	0.533162	0.333954	2.78498e-100
Gja1	0.41368	1.82274	1.36834	0.957336	0.783965	0
Guca1a	0.413628	0.0817744	0.0613907	0.120772	0.069828	1.20328e-35
Sco2	0.41333	0.446398	0.335195	0.557773	0.356733	3.02416e-99
Vps13c	0.413081	0.518753	0.389593	0.592075	0.389786	4.02637e-104
Itih5	0.413054	0.550891	0.413737	0.466078	0.344897	5.55812e-61
Agpat5	0.412676	0.519354	0.390154	0.604618	0.402591	2.65109e-101
Hars	0.412562	0.670296	0.503586	0.729285	0.497283	3.64548e-120
Pycr2	0.412373	0.450761	0.338696	0.567465	0.360009	2.03317e-102
Galnt2	0.412327	0.975273	0.73283	0.850532	0.633887	9.01671e-178
Capn2	0.411943	1.13511	0.853161	0.888445	0.70565	1.07243e-230
Nfatc2ip	0.41078	0.0800304	0.0602002	0.130939	0.0739969	5.11809e-41
Trim25	0.410779	0.433804	0.326315	0.523375	0.337825	1.91351e-92
Alg10b	0.410442	0.341855	0.257209	0.466838	0.287948	6.39169e-93
Tmem151a	0.410397	0.077657	0.0584304	0.128943	0.073848	7.2378e-39
Stard5	0.410362	0.184525	0.138843	0.259407	0.155066	2.78205e-63
Tusc1	0.4103	0.291246	0.219153	0.389396	0.238443	1.34899e-82
Susd6	0.409386	0.777167	0.585163	0.765964	0.539716	9.59324e-130
Dennd4c	0.409072	0.190536	0.143494	0.280502	0.163701	1.39877e-71
Smarca4	0.408503	0.968262	0.729493	0.857754	0.640214	3.17455e-181
Zfhx2	0.408113	0.0817284	0.0615912	0.131129	0.0736991	1.68758e-41
Rab3gap2	0.407545	0.261043	0.196802	0.366876	0.223703	5.19596e-79
Arrdc4	0.407336	0.408587	0.30808	0.486412	0.316162	5.60114e-85
Taok3	0.407275	0.66874	0.504261	0.715222	0.485223	2.27375e-117
Ephx1	0.406972	1.27249	0.959721	0.923223	0.718082	3.07437e-248
Col8a1	0.406906	0.643518	0.485367	0.532497	0.370208	1.17003e-91
Nr4a2	0.406313	0.0631853	0.0476764	0.0981566	0.0571726	6.49906e-29
Mtor	0.406184	0.399745	0.301654	0.519574	0.325542	1.17583e-95
Haus4	0.40614	0.184924	0.139551	0.25209	0.157076	1.2013e-55
Slit2	0.405653	0.844041	0.637162	0.707811	0.524008	1.13006e-121
Atp6v1c1	0.404846	0.594792	0.449257	0.68054	0.458051	1.551e-106
Syne3	0.404771	0.16183	0.122239	0.239358	0.138837	2.90939e-63
Litaf	0.404526	0.903617	0.682669	0.828582	0.599792	1.0705e-150
Zdhhc20	0.404082	0.730409	0.551983	0.756271	0.525199	1.50938e-126
Flii	0.403788	0.729104	0.551109	0.752281	0.528996	7.26985e-126
Ppp1r11	0.403258	1.49956	1.13389	0.951729	0.824239	0
Sf3a1	0.40316	0.487386	0.368561	0.596351	0.384278	3.07055e-100
Arf6	0.402927	0.912917	0.69046	0.823546	0.618551	6.2825e-160
Dhx40	0.402666	0.702475	0.531394	0.717788	0.506886	2.77106e-109
Hsd17b7	0.402525	0.583227	0.44123	0.608799	0.416586	1.02017e-96
Naa50	0.401933	0.886536	0.670969	0.806537	0.600313	1.33912e-142
Tns2	0.401317	0.348127	0.263591	0.467408	0.288766	3.50523e-91
Taf1d	0.400546	0.584265	0.442622	0.637685	0.438175	4.37591e-98
Klhdc1	0.400403	0.0659101	0.0499366	0.106518	0.0602993	1.03686e-33
Dhx38	0.400219	0.300605	0.227782	0.422273	0.25415	4.36894e-89
Kdm7a	0.400218	0.426254	0.322991	0.500855	0.327179	9.1084e-87
Plpbp	0.399335	0.367981	0.279006	0.486887	0.301124	9.50853e-94
Agpat4	0.399179	0.371639	0.28181	0.47824	0.298816	1.2094e-91
Ifi211	0.399172	0.302384	0.229296	0.376283	0.236209	1.08546e-73
Trappc10	0.398746	0.483099	0.366439	0.59198	0.3813	2.82474e-100
Eif2s1	0.398589	1.0275	0.77946	0.866401	0.668205	1.37282e-190
Rarg	0.398362	0.637317	0.483545	0.698214	0.472642	1.95104e-112
Cpne2	0.398232	0.66562	0.505064	0.709711	0.490211	2.79889e-112
Rnpep	0.397602	0.281759	0.213889	0.382839	0.237847	4.32891e-77
Arpc1b	0.3975	3.31271	2.51492	0.99981	0.987568	0
Dgkz	0.397466	0.140195	0.106435	0.221874	0.126703	3.91022e-62
Cep164	0.397367	0.894507	0.679148	0.820696	0.612075	6.74661e-154
Dhrs9	0.39718	0.0711148	0.0540004	0.109369	0.0636492	3.31974e-32
Tpm3-rs7	0.396891	1.47936	1.12356	0.952395	0.805405	0
Ak6	0.396405	0.636339	0.483458	0.696598	0.478225	5.42906e-110
Ddx54	0.395087	0.623314	0.473995	0.699639	0.472046	5.25293e-109
Exoc4	0.394053	1.03326	0.786298	0.876473	0.654954	1.98941e-173
Uap1l1	0.394018	0.90434	0.688209	0.807013	0.585498	1.52236e-139
Papss2	0.392941	0.120618	0.09186	0.193082	0.114271	3.75994e-50
Dkc1	0.392694	0.356768	0.271752	0.451349	0.289362	3.42837e-81
Pacsin2	0.392315	0.464519	0.35392	0.579057	0.371771	2.15206e-94
Rars	0.391953	0.785923	0.59895	0.780502	0.563835	2.40663e-121
Txn1	0.391593	2.9427	2.24318	1	0.989131	0
Flrt2	0.391565	1.06599	0.812608	0.833808	0.61937	1.11625e-147
Timp1	0.39091	3.73292	2.84691	0.99867	0.975434	0
Ubald2	0.39089	0.760929	0.58033	0.729095	0.541204	1.71296e-97
Mmp13	0.390116	0.294423	0.224665	0.215697	0.126182	2.20179e-63
Usp1	0.389744	0.454602	0.346982	0.486982	0.350703	9.33705e-63
Ppt2	0.389479	0.39909	0.304667	0.509787	0.330753	1.60414e-83
Ctsh	0.389165	0.530559	0.40512	0.528601	0.373632	1.4398e-77
Rsbn1	0.388288	0.328947	0.251327	0.424553	0.271719	5.6297e-75
Hdgfl3	0.387868	0.638232	0.487774	0.661631	0.469441	1.48229e-96
Adi1	0.387845	0.418064	0.319514	0.540289	0.343259	3.20265e-91
Nhlrc2	0.387116	0.325441	0.24885	0.446408	0.274027	3.12804e-87
Plk2	0.387108	0.501487	0.383468	0.560813	0.358967	4.25926e-102
Ddx46	0.387014	0.833935	0.637719	0.797225	0.581478	1.29923e-133
Slbp	0.386593	0.643609	0.492318	0.658875	0.466761	1.44941e-86
Stx3	0.386474	0.161642	0.123655	0.241543	0.143825	4.15615e-59
Slc6a8	0.386399	0.634262	0.485234	0.687951	0.471898	2.1247e-99
Mmp19	0.384705	0.553356	0.423835	0.621342	0.428944	6.95318e-88
Epn2	0.384453	0.311314	0.238488	0.426454	0.258617	1.05172e-86
Slc6a6	0.384025	1.25991	0.965466	0.912581	0.691432	3.99277e-214
Shc1	0.383512	0.908491	0.696421	0.837134	0.616616	6.92697e-139
Trmt10c	0.382897	0.23605	0.181026	0.349772	0.207846	3.06913e-79
Nepro	0.382378	0.0605416	0.0464459	0.0992018	0.056726	1.06228e-30
Jpt1	0.382304	1.36564	1.04773	0.915811	0.777935	7.7939e-255
Jcad	0.382027	0.332633	0.255249	0.435481	0.271496	8.75751e-83
Col6a3	0.381894	2.00353	1.53756	0.974724	0.89027	0
Atic	0.380446	0.434828	0.334035	0.547891	0.352788	2.35235e-89
Nmrk1	0.380387	0.140111	0.107638	0.20667	0.123874	2.19649e-50
Mef2a	0.379794	0.746692	0.573868	0.732421	0.534207	1.0193e-104
Ncbp1	0.379259	0.374471	0.287905	0.493919	0.315566	2.33651e-83
Hebp2	0.379098	0.578496	0.444816	0.620487	0.436239	4.47053e-82
Bak1	0.378959	0.614236	0.472343	0.687476	0.472716	3.46606e-98
Elmod2	0.378921	0.206131	0.158518	0.287913	0.180674	1.85647e-57
Bola2	0.378311	1.64517	1.26569	0.973679	0.85759	0
Syne2	0.377969	0.232877	0.179203	0.308818	0.191022	1.62285e-66
Uba1	0.377919	1.26199	0.971161	0.937191	0.76193	8.98523e-267
U2af2	0.377329	0.650495	0.500791	0.715032	0.496092	3.00785e-102
Uggt1	0.377241	0.52233	0.402146	0.628848	0.417926	3.57787e-91
Slc25a40	0.37576	0.139815	0.107756	0.222539	0.1305	6.39814e-57
Nt5c	0.375588	1.33526	1.02921	0.945268	0.785305	2.38153e-296
Cox18	0.375157	0.498813	0.384595	0.598347	0.403037	8.33271e-86
Slc25a30	0.374596	0.192031	0.148118	0.286298	0.171816	5.40688e-65
Irf2bpl	0.374437	0.745735	0.575265	0.744774	0.522221	1.62731e-105
Crk	0.37362	0.656309	0.506568	0.713417	0.498102	2.58819e-99
Mitf	0.372707	0.476846	0.368283	0.537628	0.365592	7.23101e-80
Csnk1g1	0.372009	0.56656	0.437784	0.646047	0.435048	4.91348e-94
Cpd	0.371918	0.701106	0.541783	0.721304	0.509045	8.21769e-98
Clic4	0.371551	1.08216	0.836453	0.868871	0.671778	3.50995e-155
Larp7	0.370349	0.490059	0.379107	0.576587	0.38733	6.12769e-85
Mtmr14	0.370204	0.13609	0.105289	0.210756	0.126405	7.5534e-51
Prmt5	0.370171	0.304231	0.235381	0.424648	0.261222	3.37463e-82
Naa10	0.369467	0.51052	0.395177	0.611935	0.401697	1.87613e-89
Pgls	0.369465	2.29165	1.7739	0.996769	0.949825	0
Fam120a	0.369457	0.966719	0.748312	0.858039	0.653689	1.77166e-149
Dpy30	0.369433	0.772606	0.598064	0.751615	0.56056	6.9333e-105
Pgam1	0.36882	1.9114	1.48022	0.987362	0.903745	0
Ilrun	0.36822	0.602281	0.46661	0.682155	0.464379	1.14619e-92
Nap1l1	0.368028	2.1437	1.66103	0.987077	0.944912	0
Lta4h	0.367766	0.371175	0.287654	0.495344	0.314524	3.34634e-83
Tob2	0.367659	0.338578	0.262411	0.448974	0.281918	1.14335e-80
S100a16	0.367584	1.0502	0.813988	0.772045	0.633887	1.00012e-123
Tagap1	0.366718	0.0771998	0.0598719	0.127613	0.0723591	4.26155e-39
Senp1	0.366664	0.230266	0.178588	0.336184	0.20271	4.41483e-72
Ipo5	0.365262	0.504354	0.391545	0.58913	0.400655	9.5042e-81
Sf3b3	0.365078	0.899073	0.698064	0.833238	0.621827	2.72753e-127
Usp10	0.364237	0.428312	0.332747	0.549506	0.349512	5.21521e-89
Tipin	0.364093	0.423676	0.329178	0.483751	0.344748	6.70404e-60
Gnptab	0.364061	0.149023	0.115787	0.233276	0.138837	2.19127e-56
Flrt3	0.363496	0.30789	0.239316	0.374287	0.23405	6.28207e-75
S100a4	0.363242	5.0238	3.90558	1	0.99732	0
Pdgfa	0.363053	0.546593	0.424986	0.561098	0.405271	3.26989e-68
Csgalnact1	0.362508	1.26639	0.985013	0.906594	0.736395	7.92262e-199
Nfkb2	0.362475	0.259542	0.201879	0.371817	0.226308	2.36659e-74
Snd1	0.361953	0.670885	0.522023	0.723584	0.509566	1.00841e-94
Midn	0.361885	0.7628	0.593571	0.775181	0.55319	1.66978e-105
Gcsh	0.361454	0.695591	0.541434	0.72767	0.512916	1.29318e-95
Fads2	0.361243	0.484457	0.377147	0.552357	0.377429	2.43643e-76
Impdh1	0.360692	0.291973	0.227386	0.403459	0.253034	3.31524e-73
Mmd	0.360604	0.323093	0.251637	0.414956	0.271272	1.20927e-66
Prps1	0.360536	0.202054	0.157375	0.303307	0.184471	5.54222e-65
Lmna	0.359887	3.01895	2.35244	0.998955	0.992928	0
Mapre1	0.359813	1.47491	1.14934	0.962657	0.829152	0
Cenpc1	0.359697	0.292189	0.227711	0.399278	0.25214	1.42215e-71
Psmc1	0.359608	0.970994	0.756769	0.863835	0.658676	1.26082e-141
Nop58	0.359507	0.673444	0.524903	0.685006	0.498325	3.03953e-86
Prdx1	0.359479	3.98422	3.10548	0.999905	0.99866	0
Sae1	0.359444	0.754319	0.587965	0.757032	0.554083	5.60944e-99
Immt	0.359129	1.11915	0.872532	0.896902	0.715923	5.54833e-181
Hspa4	0.358932	1.32834	1.03576	0.931205	0.775776	5.9875e-245
Capza1	0.358735	1.0405	0.811432	0.888635	0.691878	1.35211e-163
Nupr1	0.358523	2.40884	1.8788	0.964557	0.884687	0
Kctd10	0.357927	0.697437	0.5442	0.732421	0.513512	3.37759e-95
Fip1l1	0.357893	1.14324	0.892075	0.898518	0.722475	2.32677e-180
Katnbl1	0.357833	0.291089	0.227147	0.403649	0.253034	5.9225e-73
Wbp2	0.357413	0.70314	0.548845	0.74791	0.522147	1.36365e-94
Llph	0.357345	1.38419	1.08049	0.952109	0.804586	7.7657e-276
Pcmt1	0.357279	1.03575	0.808541	0.874572	0.688975	1.13034e-157
Dst	0.357056	1.34016	1.04634	0.923223	0.765652	4.09392e-213
Tpm2	0.356822	2.18179	1.70372	0.988502	0.916847	0
G3bp1	0.356713	1.19002	0.929335	0.910395	0.739299	2.60028e-197
Psip1	0.355929	0.756498	0.591102	0.718263	0.530559	5.83852e-92
Stxbp2	0.355792	0.0733437	0.0573138	0.11203	0.0660314	3.9712e-31
Celf1	0.355682	0.718216	0.561286	0.744394	0.527358	1.32141e-97
Hectd1	0.355569	1.38511	1.08255	0.950114	0.809871	1.88118e-280
Akr1b3	0.355271	0.859123	0.671596	0.807488	0.59793	1.52772e-112
Htr2a	0.35506	0.0902729	0.0705787	0.135975	0.0845679	1.61537e-31
Sesn3	0.354396	1.48763	1.16362	0.927119	0.794164	4.87455e-199
Wdr18	0.35429	0.657003	0.513944	0.717978	0.502494	7.83866e-90
Rell1	0.353272	0.220725	0.172785	0.310433	0.197424	8.79769e-58
Pfdn6	0.352857	1.02708	0.804236	0.871437	0.686965	1.04508e-145
Lgals7	0.35278	0.311728	0.244106	0.324591	0.21075	7.13746e-62
Pomgnt1	0.352312	0.44265	0.34674	0.565089	0.368719	1.84177e-80
Syce2	0.351814	0.112498	0.0881532	0.162676	0.101467	2.66103e-36
Rab11fip5	0.350974	0.255313	0.200179	0.370296	0.229882	2.12257e-69
Mapk9	0.350234	0.340158	0.266839	0.461897	0.29167	8.92513e-77
Psmd11	0.349979	1.37312	1.07735	0.950209	0.804511	1.18728e-279
Lzic	0.349956	0.462034	0.362515	0.564994	0.376312	4.49037e-77
Ppid	0.349863	0.759508	0.595954	0.775561	0.561528	5.36855e-96
Ctbp1	0.349725	0.885058	0.694535	0.828392	0.621157	1.90776e-119
Cfap36	0.349227	1.09404	0.858823	0.88664	0.705352	2.20019e-163
Polr2l	0.349178	1.52093	1.19398	0.948784	0.81806	5.07616e-295
Mindy3	0.349144	0.314329	0.246764	0.438046	0.273133	1.33647e-76
Eea1	0.349097	0.778815	0.611428	0.739643	0.559592	3.27506e-93
Limk2	0.348986	0.144777	0.11367	0.227955	0.136902	2.32521e-53
Agps	0.348805	0.311761	0.244805	0.430445	0.274027	7.12979e-71
Mpg	0.348168	0.837107	0.657615	0.813284	0.5986	9.99571e-106
Kdsr	0.348138	0.510485	0.401035	0.609654	0.406462	5.8655e-82
Gtf2f1	0.347611	0.681347	0.53546	0.733941	0.517383	2.65581e-88
Pde8a	0.346645	0.163609	0.128664	0.245819	0.147026	9.42876e-58
Dtymk	0.346285	1.04974	0.825731	0.851007	0.685625	4.93553e-126
Noc4l	0.34601	0.232016	0.18254	0.34293	0.209112	8.38147e-69
Eif2s3x	0.345957	0.573491	0.451215	0.655074	0.452319	5.80731e-80
Abl1	0.345804	0.437915	0.344582	0.542949	0.363061	2.34877e-74
Fbxo34	0.345404	0.250385	0.197075	0.353573	0.221618	2.18036e-65
Ckb	0.34529	0.981397	0.772506	0.750855	0.584754	1.27886e-98
Dhx58	0.343992	0.126243	0.099462	0.177499	0.110698	3.26447e-38
Emd	0.343687	0.643046	0.506736	0.706385	0.492146	2.15853e-85
Lipe	0.343615	0.0792806	0.0624782	0.124952	0.0733269	2.3336e-34
Casp7	0.343498	0.118556	0.0934372	0.182725	0.109358	5.817e-45
Gnai1	0.343128	0.142169	0.112076	0.217598	0.130202	1.30103e-52
Scn1b	0.342936	1.31787	1.03906	0.936146	0.768629	2.69306e-192
Nrg1	0.342759	0.284824	0.224592	0.321931	0.216928	2.23716e-51
Nxt1	0.342731	0.369808	0.291611	0.469213	0.313333	1.12119e-65
Rere	0.342269	0.890414	0.702358	0.814709	0.617956	8.91202e-109
Tpm3	0.341872	1.70773	1.34743	0.969878	0.87419	0
Apaf1	0.341783	0.22136	0.174667	0.314424	0.196308	8.16826e-61
Lama2	0.341575	0.110559	0.0872511	0.154409	0.0984888	1.25674e-31
Calm1	0.341539	3.19249	2.51951	0.999715	0.993747	0
Ccdc93	0.341169	0.259644	0.204963	0.366496	0.232636	7.42026e-64
Ap1s1	0.341146	1.35994	1.07356	0.940232	0.796769	1.64718e-253
Stk3	0.340927	0.81722	0.645223	0.774325	0.569344	5.77176e-103
Cep192	0.34065	0.222459	0.175673	0.309958	0.198392	1.96516e-55
Eif4g1	0.340381	1.56459	1.23577	0.964747	0.845604	0
Ahctf1	0.338825	0.350955	0.277495	0.466363	0.297774	8.81006e-74
Eif1ad	0.338208	0.430699	0.340693	0.541714	0.360158	2.24841e-72
Ppm1d	0.337841	0.215707	0.170673	0.307488	0.190799	2.79374e-60
Ago3	0.337325	0.356919	0.282504	0.467788	0.304548	2.14743e-70
Sephs2	0.337043	0.265412	0.210117	0.382079	0.237028	1.15357e-70
Wee1	0.336314	0.175849	0.139284	0.244584	0.156108	1.22296e-46
Psmd13	0.335688	1.28093	1.01502	0.935671	0.782625	1.58635e-223
Mcrip2	0.335625	0.162917	0.129102	0.253041	0.151641	5.6573e-58
Cap1	0.335532	0.947049	0.750528	0.848917	0.643788	3.42471e-113
Bax	0.334772	2.68659	2.13022	0.998765	0.977667	0
Arhgef5	0.334574	0.27102	0.214924	0.377708	0.241123	1.24541e-64
Banf1	0.334553	1.36654	1.08371	0.938331	0.808978	6.56683e-263
Tekt2	0.334486	0.0925513	0.0733993	0.142816	0.0853867	1.39892e-36
Ston1	0.334468	0.123069	0.0976032	0.184246	0.115909	3.59924e-38
Prelid3b	0.334323	0.608947	0.48299	0.685386	0.480161	6.93229e-78
Lrp11	0.334284	0.135621	0.107572	0.217788	0.132882	4.20072e-48
Irf2bp2	0.334017	0.978106	0.775956	0.848537	0.656518	2.56863e-120
Thy1	0.333446	1.20743	0.958267	0.660965	0.570386	6.62316e-84
Nipa2	0.333313	0.52769	0.418833	0.631034	0.428125	5.12437e-74
Cbfb	0.333033	0.391414	0.31073	0.496104	0.332093	7.25849e-67
Zfhx3	0.332371	0.814699	0.647058	0.755511	0.56659	2.2118e-89
Vdac1	0.331762	1.5466	1.22887	0.969023	0.856696	0
Emc6	0.331671	1.07457	0.853868	0.892531	0.705948	1.91137e-143
E2f1	0.331561	0.419272	0.333185	0.516819	0.352192	2.37884e-65
Samd4b	0.331487	0.672361	0.534337	0.721209	0.514479	6.8842e-81
Pwwp2b	0.330444	0.153511	0.122086	0.236887	0.143304	5.43586e-53
Traf5	0.330196	0.11588	0.0921742	0.174268	0.104072	4.88559e-43
Zc3h7a	0.329638	0.347433	0.276465	0.464367	0.297774	1.67764e-70
Ppp2r2a	0.329436	0.814813	0.648467	0.799316	0.593613	4.87368e-95
Mpp1	0.32938	1.0505	0.836072	0.829628	0.623911	2.13195e-113
Sart3	0.329366	0.232459	0.185011	0.335804	0.21209	2.03435e-59
Smyd2	0.329169	0.592419	0.471562	0.666477	0.46624	6.08607e-75
Ccnd2	0.328852	2.85741	2.27498	0.995344	0.973573	0
Chp1	0.328704	0.792456	0.630994	0.795515	0.584977	1.09391e-87
Naa15	0.328665	0.631743	0.50304	0.696028	0.493412	1.26339e-75
Naa40	0.328404	0.203449	0.162031	0.299886	0.18395	4.5182e-60
Rassf1	0.328062	0.504563	0.401938	0.600247	0.406387	3.15464e-72
Ankrd44	0.327931	0.126187	0.100531	0.168472	0.110474	2.61095e-30
Dnajc15	0.327923	0.854535	0.680793	0.805777	0.60798	3.26193e-88
Gypc	0.327881	0.312151	0.248692	0.423318	0.27157	1.4443e-67
Nrf1	0.327854	0.170688	0.13599	0.256651	0.155959	9.61726e-56
Hacd1	0.327779	0.60146	0.479221	0.654504	0.457083	6.40379e-77
Ccdc85b	0.327571	1.68626	1.34375	0.958096	0.867937	0
Crip1	0.327125	1.64345	1.31003	0.861935	0.759547	2.81384e-134
Abca3	0.326922	0.244706	0.195088	0.355568	0.221246	3.33534e-64
Ethe1	0.326834	0.735428	0.586345	0.742303	0.551701	1.00218e-78
Erlin1	0.326813	0.217059	0.17306	0.322691	0.198913	1.31155e-62
Agtpbp1	0.32662	0.365146	0.291169	0.484132	0.319065	9.73481e-67
Neat1	0.326514	1.90232	1.51702	0.926169	0.829003	4.98686e-217
Haus8	0.326135	0.179253	0.142985	0.242968	0.164446	5.53763e-37
C1qbp	0.325941	1.30959	1.04476	0.935861	0.785454	4.78222e-205
Morc3	0.325744	0.355316	0.283502	0.475485	0.30641	7.8606e-70
Setx	0.325301	0.389036	0.310502	0.495914	0.329338	4.48436e-67
Clic1	0.32522	2.76822	2.20953	0.99905	0.989652	0
Tspo	0.324914	2.49733	1.99373	0.992018	0.953547	0
Tmsb15b2	0.324789	0.123836	0.0988724	0.15859	0.109581	1.1324e-23
Rab11a	0.324505	1.32671	1.05947	0.945078	0.796695	5.99766e-220
Rbm15	0.324428	0.200082	0.159789	0.299791	0.183652	9.26862e-61
Map3k5	0.323928	0.0597873	0.0477636	0.0993919	0.0585126	9.58853e-28
Tmtc4	0.323697	0.254005	0.202955	0.351672	0.223703	4.16024e-61
Rgs2	0.323351	0.452619	0.361738	0.413531	0.295541	1.13654e-52
Ppp1cc	0.323246	1.22935	0.982585	0.921038	0.763716	2.62872e-158
Hnrnpm	0.322964	1.00263	0.801526	0.869631	0.680712	6.25573e-118
Hnrnph1	0.322812	0.845296	0.675822	0.805207	0.606343	4.21356e-94
Fes	0.322728	0.151298	0.120971	0.22938	0.140549	4.07401e-49
Gapdh	0.322214	3.4387	2.75042	1	0.99665	0
Tmem45a	0.321915	1.18087	0.944705	0.81946	0.716519	9.3138e-114
Myef2	0.321196	0.464282	0.371614	0.563759	0.38197	1.04488e-69
Atp2a2	0.320556	1.18331	0.947552	0.917807	0.735502	3.52856e-147
Tnk2	0.320377	0.168502	0.134947	0.256556	0.157746	2.48802e-53
Dusp18	0.320136	0.18741	0.150115	0.284683	0.175017	8.49343e-58
Arhgap21	0.319942	0.34771	0.278551	0.453725	0.299933	6.96746e-63
Rtl8a	0.319554	1.38528	1.11005	0.90764	0.803841	1.20365e-179
Gpn3	0.319512	0.188759	0.15126	0.283162	0.176655	8.74715e-54
Azin1	0.319492	0.418387	0.335275	0.531547	0.356733	5.42682e-67
Ipo9	0.319472	0.441982	0.354188	0.553497	0.370431	4.53347e-69
Rybp	0.319188	0.311071	0.24933	0.420277	0.26889	1.61603e-66
Etf1	0.319185	0.882419	0.707279	0.829247	0.630835	3.09172e-97
Flot2	0.318832	0.565392	0.453286	0.652414	0.457083	1.6146e-70
Cpsf2	0.318241	0.612422	0.491191	0.68206	0.481575	3.80872e-71
Alyref	0.318074	1.1011	0.883235	0.872292	0.715105	2.00184e-118
Atp13a3	0.317914	0.659914	0.529402	0.690802	0.48835	7.46962e-75
Pcnt	0.317911	0.254952	0.20453	0.336754	0.225117	1.97671e-49
Rpp30	0.317748	0.365688	0.2934	0.489643	0.318767	3.15912e-67
Mis12	0.317603	0.273457	0.219422	0.376568	0.24678	1.25163e-56
Slc48a1	0.317563	1.36703	1.09694	0.941182	0.793717	3.02432e-196
Ccdc74a	0.317557	0.35454	0.284493	0.460661	0.299561	1.69968e-68
Ppih	0.317396	0.437976	0.351483	0.538103	0.370952	1.15129e-61
Rrp8	0.316854	0.432298	0.347057	0.553307	0.364178	2.83591e-70
Cpa6	0.316825	0.137387	0.110299	0.194603	0.123576	1.03882e-38
Lmo1	0.316602	0.379014	0.304332	0.451349	0.308568	2.17216e-59
A4galt	0.315419	0.239633	0.192573	0.325162	0.213355	7.09221e-52
Vars	0.315269	0.451905	0.363197	0.559293	0.379066	7.22213e-66
Rfc3	0.315187	0.373717	0.300374	0.463417	0.315268	4.65303e-58
Carnmt1	0.314449	0.73178	0.588467	0.744014	0.555498	9.00423e-78
Pgp	0.314143	0.990705	0.796853	0.848347	0.667089	1.77865e-105
Slc29a1	0.314094	0.743202	0.597799	0.687951	0.53309	8.02403e-69
S100a1	0.313778	0.982207	0.790217	0.787723	0.611628	1.2347e-87
Rnaseh2b	0.313504	0.20359	0.163825	0.304067	0.188714	1.34582e-57
Glrx5	0.312464	1.46694	1.18128	0.962372	0.837415	9.95463e-262
Kars	0.312422	0.531932	0.428359	0.633979	0.43743	2.02601e-68
Uhrf1bp1l	0.312309	0.379456	0.305595	0.491638	0.328817	3.57043e-62
Nabp1	0.311947	0.1802	0.145161	0.245914	0.163255	1.05426e-39
Uchl3	0.311923	0.563363	0.453827	0.647853	0.457902	4.06375e-65
Fbxo25	0.311533	0.39408	0.317544	0.511307	0.340951	5.83561e-64
N4bp1	0.31146	0.784934	0.63252	0.769669	0.572173	1.10361e-77
Mettl16	0.311415	0.40429	0.325798	0.52309	0.346535	8.56183e-67
Dph3	0.311015	1.21593	0.980132	0.918282	0.761483	6.63241e-167
Mtrex	0.310854	0.312973	0.252308	0.435671	0.275962	3.60369e-67
Huwe1	0.310818	1.08614	0.875633	0.88797	0.71034	3.2932e-120
Mid1ip1	0.310712	0.44602	0.359601	0.534968	0.356733	5.03716e-69
Ssrp1	0.310592	1.10529	0.891211	0.877613	0.723814	6.98917e-117
Trp53	0.310269	0.948112	0.764645	0.848537	0.662324	1.95189e-98
Tmem237	0.310123	0.573501	0.462571	0.65707	0.463932	3.21259e-68
Pin1	0.309949	1.25091	1.00907	0.927879	0.779424	2.35838e-180
Psmd14	0.309884	0.908014	0.732501	0.837324	0.64684	1.39646e-96
Kpna3	0.309667	0.459787	0.370969	0.56737	0.386139	3.01294e-64
Abce1	0.308933	0.699398	0.564581	0.731376	0.537036	3.0014e-70
Cct5	0.308868	1.58805	1.28199	0.97862	0.873669	0
Gnl1	0.308724	0.701382	0.566265	0.740403	0.542991	6.67774e-73
Vcan	0.308409	1.1727	0.946989	0.795515	0.655922	4.12114e-85
Spidr	0.30835	0.195228	0.15766	0.282117	0.18194	7.68133e-48
Cbl	0.308131	0.381078	0.307792	0.495819	0.325318	1.80115e-65
Prkag2	0.308004	0.075648	0.0611053	0.129323	0.0756346	2.69267e-35
Snrpf	0.307825	1.41704	1.14477	0.938331	0.829227	4.09461e-225
Pop5	0.307612	0.684671	0.553199	0.72615	0.525497	5.21222e-70
Ifi203	0.306302	0.283192	0.229021	0.318415	0.225787	2.73008e-36
Hsp90aa1	0.305643	2.55341	2.06592	0.996769	0.975508	0
Nedd1	0.305199	0.168026	0.135988	0.255226	0.157374	2.38997e-51
Nap1l4	0.305197	0.91691	0.742085	0.835614	0.654805	7.20509e-96
Mgst2	0.30462	0.153468	0.124256	0.196693	0.132584	8.36022e-31
Cenpj	0.304599	0.120803	0.0978105	0.185291	0.113899	6.29941e-41
Ccdc124	0.30427	1.06607	0.863358	0.884835	0.709819	5.60534e-118
Hspd1	0.304148	1.65942	1.344	0.961612	0.877243	5.43066e-296
Ddr2	0.304052	1.47178	1.1921	0.95287	0.82342	6.25536e-206
Fez2	0.303511	0.489398	0.396549	0.595116	0.408397	6.27375e-62
Pxk	0.302811	0.516479	0.418694	0.605853	0.418968	2.03318e-66
Arpin	0.302798	0.171697	0.139191	0.257507	0.163106	1.1281e-47
Mitd1	0.302128	0.422753	0.342876	0.529456	0.358892	9.42483e-61
Cdc14b	0.302112	0.129017	0.104641	0.198879	0.124544	2.25778e-40
Dgka	0.301884	0.0749331	0.0607852	0.110889	0.0707958	2.7297e-23
Adam10	0.301883	0.746536	0.605585	0.751425	0.557954	2.65183e-70
Cars	0.301318	0.501144	0.406683	0.595876	0.408323	1.57428e-66
Ndufaf2	0.301128	0.672042	0.545441	0.719498	0.524008	1.13898e-65
Spop	0.300974	1.07689	0.874118	0.889586	0.718157	1.12766e-113
Bicd2	0.300809	0.539678	0.438109	0.63436	0.44145	2.13109e-63
Usp24	0.300776	0.273785	0.222263	0.3874	0.247674	1.01603e-60
Ten1	0.300706	0.424527	0.344655	0.517199	0.342812	1.45841e-69
Speg	0.300637	0.27585	0.223961	0.345686	0.24142	1.98635e-43
Psmd2	0.300631	1.42634	1.15804	0.958761	0.833842	4.31282e-233
Slc25a33	0.300444	0.0989402	0.0803396	0.163816	0.0982655	5.19814e-40
Pcx	0.300225	0.192844	0.156613	0.267294	0.182163	1.39701e-37
Phactr4	0.300144	0.252876	0.205379	0.361079	0.229137	4.37419e-59
Nid1	0.299977	1.41333	1.148	0.917712	0.792005	6.79212e-140
Cisd1	0.299811	1.08455	0.881047	0.874382	0.717189	8.79269e-117
Adgra2	0.299479	0.415557	0.337659	0.502566	0.345418	9.60487e-59
Bckdk	0.299138	0.6479	0.526573	0.708856	0.507407	3.79484e-67
Cct6a	0.29907	1.43077	1.16289	0.948689	0.836745	1.23259e-227
Sf1	0.298674	0.553079	0.449653	0.645952	0.452617	2.18853e-62
Mif	0.298548	2.01563	1.63885	0.988122	0.913645	0
Leo1	0.298524	0.488479	0.397174	0.590935	0.407876	5.40767e-61
Aprt	0.298353	2.28667	1.85948	0.995914	0.968585	0
[truncated: 3,001 more rows]

## Sheet: Up-regulated
gene	log2FC	FGF2	BSA	FGF2 (%)	BSA (%)	Adjusted P value
Chrna1	6.62743	0.315948	0.00319565	0.332193	0.00446661	0
Ptpn22	6.16577	0.205284	0.00285939	0.250665	0.00357329	0
Nppc	6.1633	0.177063	0.00247053	0.168472	0.00260552	0
Etv4	5.77955	0.256078	0.0046618	0.337609	0.00558327	0
Hmga1b	5.74186	0.188784	0.00352772	0.287248	0.00498772	0
Upp1	5.35718	0.387574	0.00945543	0.385405	0.0107943	0
Kctd4	5.21891	0.129292	0.00347153	0.188807	0.00454106	0
Hmga1	5.18688	1.3106	0.03598	0.882744	0.0442195	0
Tslp	5.1093	1.3589	0.0393674	0.785823	0.0463039	0
Esm1	5.01686	0.549025	0.0169576	0.397853	0.014442	0
Lgr6	4.73703	0.0897615	0.0033659	0.126283	0.00498772	0
S100a8	4.73086	0.769731	0.0289873	0.534873	0.0323085	0
Dusp6	4.72957	0.832027	0.0313614	0.768624	0.036254	0
Trbc2	4.69547	0.177442	0.00684827	0.171323	0.00796546	0
Il18rap	4.59089	0.127044	0.0052718	0.191087	0.00699769	0
Serpinb2	4.5631	0.0598455	0.00253163	0.0667997	0.00238219	2.57913e-180
Frzb	4.5279	0.257663	0.0111691	0.286393	0.0134743	0
Kcnn4	4.4926	0.406203	0.0180441	0.453345	0.0229286	0
Sema7a	4.48826	0.150568	0.00670863	0.177499	0.00841212	0
Entpd1	4.48332	0.111185	0.00497088	0.130179	0.00588104	0
Unc13c	4.48013	0.364626	0.0163379	0.432725	0.0188342	0
Krt18	4.4686	0.0459627	0.00207597	0.0381034	0.00193553	1.35389e-97
Fosl1	4.29932	0.842073	0.0427686	0.779266	0.0509194	0
Spry4	4.19034	0.621389	0.0340364	0.611365	0.0387851	0
Itga6	4.11247	1.0947	0.0632873	0.789434	0.0757091	0
Ptgs2	4.11034	0.178945	0.0103606	0.198594	0.0110176	0
Gprc5a	4.09986	0.333624	0.019457	0.386925	0.0262041	0
Lbhd2	4.09089	0.118165	0.00693441	0.139111	0.00826323	0
Nrcam	4.05483	0.234319	0.0140988	0.255416	0.0175687	0
Camk1d	3.91798	0.412384	0.0272817	0.477955	0.0332763	0
Adam8	3.86793	0.750176	0.0513806	0.669707	0.0620859	0
Cxcl10	3.84776	0.0569651	0.00395656	0.0425694	0.00297774	2.30272e-102
Clic5	3.75198	0.0893489	0.0066318	0.115355	0.00863545	1.14277e-279
Prkcb	3.65072	0.265178	0.0211136	0.270049	0.0250875	0
Erich2	3.64785	0.234006	0.0186687	0.332383	0.0244175	0
Slco2a1	3.64297	1.34164	0.107397	0.828297	0.113601	0
Plaur	3.62164	0.465814	0.0378434	0.520715	0.0463783	0
Notum	3.53206	0.158484	0.0137003	0.207716	0.0165265	0
Nes	3.52149	0.273369	0.0238054	0.299601	0.0244919	0
E2f8	3.49903	0.220294	0.0194845	0.275466	0.0235986	0
Nxph3	3.42684	0.125765	0.0116944	0.167237	0.0134743	0
Arhgap22	3.40142	0.609594	0.0576913	0.649848	0.0712425	0
Prkg2	3.3502	1.33136	0.130553	0.845591	0.137869	0
Nav2	3.27766	0.627354	0.0646903	0.582478	0.0762302	0
Tinagl1	3.21732	0.597963	0.0642933	0.500285	0.0664781	0
Mcpt8	3.20151	0.534542	0.0581073	0.359844	0.0538227	0
Prl2c3	3.2002	0.0735797	0.00800576	0.0797225	0.00885878	4.21679e-169
Cck	3.19364	1.05629	0.115453	0.528981	0.0947666	0
Nptx1	3.12173	0.280602	0.0322372	0.256651	0.0315641	0
Slc14a1	3.11712	0.921471	0.106203	0.628943	0.0999032	0
Slc16a11	2.98745	0.162475	0.0204868	0.170468	0.0251619	0
S100a7a	2.95862	0.151653	0.0195083	0.183105	0.0235242	0
Eva1c	2.95458	0.24206	0.0312253	0.310148	0.0353607	0
Aldh1a3	2.94336	0.0818584	0.010642	0.0973964	0.0114643	5.20403e-203
Ramp3	2.89109	0.277183	0.0373647	0.323356	0.0431028	0
Plk3	2.8821	0.135169	0.0183349	0.209521	0.0230031	0
Neto2	2.87699	0.656517	0.0893689	0.551786	0.0999032	0
Rin1	2.87456	0.311834	0.0425202	0.423983	0.0542693	0
Anln	2.86538	0.416967	0.0572185	0.320981	0.0458572	0
AA467197	2.76659	0.187085	0.0274925	0.231851	0.0344674	0
Hmga2	2.75901	2.78117	0.410849	0.988788	0.389861	0
Itga4	2.75255	0.148632	0.0220553	0.168282	0.0228542	0
Akr1c18	2.75164	0.129844	0.0192796	0.127803	0.0175687	7.58141e-253
Itgb2	2.74984	0.0961861	0.0142998	0.150418	0.0179409	0
Tmem200a	2.74974	0.220887	0.0328409	0.269574	0.0371473	0
Etv1	2.74554	0.991646	0.147866	0.827347	0.164669	0
Ptgir	2.74296	0.308077	0.0460198	0.361174	0.0515149	0
Pidd1	2.74223	0.150912	0.0225544	0.222349	0.0281397	0
Abcb1a	2.73144	0.177288	0.0266953	0.265393	0.0348396	0
Itgb7	2.72696	0.0992282	0.0149878	0.146997	0.0206209	1.87005e-289
Prl2c2	2.72618	0.068224	0.0103104	0.0657545	0.0104965	1.80802e-118
Plk1	2.72151	0.239884	0.0363701	0.209521	0.0291819	0
Cep55	2.72093	0.112819	0.0171121	0.139586	0.0185364	5.06371e-281
Myzap	2.71293	0.209683	0.0319809	0.266724	0.0383384	0
Adora2b	2.70395	0.15705	0.0241029	0.220734	0.0302241	0
Nek2	2.68927	0.0896759	0.0139035	0.120772	0.0156331	2.17401e-243
Kif2c	2.67654	0.159468	0.0249432	0.165526	0.0241941	0
Tmem51	2.66718	0.100134	0.0157645	0.144052	0.0192809	3.09255e-288
Ccnb1	2.62771	0.327343	0.0529645	0.24924	0.0413162	0
Apcdd1	2.62045	0.158866	0.0258344	0.20344	0.027693	0
Errfi1	2.6171	1.37105	0.223475	0.856899	0.213876	0
Itgb3	2.58242	0.210232	0.0351004	0.276511	0.0418373	0
Il11	2.57696	0.234181	0.0392473	0.279171	0.0452617	0
Hmmr	2.5699	0.408176	0.0687433	0.257317	0.0434006	0
Iqgap3	2.56583	0.0826048	0.0139513	0.117636	0.0160054	3.84132e-231
Ccl2	2.55265	1.57116	0.26779	0.784113	0.191618	0
Ube2c	2.55123	0.679144	0.115869	0.399278	0.0752624	0
Sgms2	2.54164	0.508285	0.0872965	0.537438	0.108315	0
Spag5	2.53938	0.0962269	0.0165526	0.135405	0.0208442	2.17062e-253
Sh3bgrl2	2.53783	0.119434	0.0205667	0.183105	0.0266508	0
Cdc25c	2.53208	0.106529	0.0184178	0.13797	0.0214397	1.86076e-257
Plau	2.5194	0.10417	0.0181689	0.144147	0.0241197	1.82551e-259
Bub1b	2.50025	0.16415	0.0290128	0.177214	0.0272463	0
Phlda1	2.49958	0.958873	0.169555	0.776796	0.172188	0
Trpm6	2.49599	0.127124	0.022535	0.18016	0.0292563	0
Aspm	2.49544	0.171091	0.0303407	0.161821	0.0241197	0
Tbc1d2	2.4739	0.219638	0.0395356	0.318415	0.0489094	0
Nuf2	2.46747	0.222335	0.0401998	0.214747	0.0346162	0
Asf1b	2.45705	0.160518	0.0292333	0.191657	0.0311174	0
Knl1	2.45623	0.207974	0.0378974	0.188902	0.0316385	0
Mki67	2.45175	0.380106	0.069479	0.237742	0.0435495	0
Gtse1	2.45079	0.31324	0.0572949	0.388921	0.0682647	0
Tcim	2.44765	0.306033	0.0560987	0.316135	0.0562793	0
Ect2	2.44384	0.149976	0.0275646	0.174933	0.0296285	0
Dusp5	2.43802	0.2379	0.0439013	0.303402	0.0508449	0
Cenpf	2.43108	0.463313	0.0859105	0.268529	0.0502494	0
Kif11	2.42786	0.197133	0.0366353	0.18377	0.0329785	0
Pbk	2.42782	0.254293	0.0472593	0.210186	0.0345418	0
Kif23	2.41941	0.190218	0.0355578	0.18263	0.0288841	0
Spred3	2.41508	0.302156	0.0566525	0.414671	0.0686369	0
Ndc80	2.41085	0.184549	0.0347036	0.194318	0.0320107	0
Bub1	2.41069	0.13221	0.0248642	0.16011	0.0262041	7.61171e-293
Dlgap5	2.4064	0.197998	0.0373474	0.200209	0.036924	0
Ccnf	2.39563	0.168635	0.0320473	0.211422	0.0360307	0
Cenpe	2.39105	0.34954	0.0666374	0.24924	0.0508449	0
Fam78b	2.38395	0.231268	0.0443074	0.305207	0.054046	0
Syngr1	2.37505	0.101283	0.0195244	0.13816	0.0242686	2.75021e-240
Nusap1	2.3729	0.312902	0.0604077	0.214082	0.0387851	0
Cit	2.36816	0.136155	0.0263722	0.164386	0.029703	8.38885e-286
Cenpi	2.36553	0.0926044	0.0179695	0.136735	0.0221842	3.23819e-247
Ncapg	2.36189	0.180262	0.0350674	0.190137	0.0363284	0
Birc5	2.35579	0.522866	0.102148	0.321931	0.0696791	0
Chst1	2.35542	0.238706	0.0466456	0.297605	0.0551627	0
Ercc6l	2.35144	0.101214	0.0198331	0.139396	0.0233008	1.52161e-248
Spink2	2.35105	0.135847	0.0266266	0.195363	0.0325318	0
Kif4	2.34287	0.145303	0.0286418	0.167807	0.027693	2.51562e-305
Mtcl1	2.34058	0.117568	0.0232117	0.180635	0.0288841	0
Gsdme	2.33567	0.263901	0.0522798	0.364025	0.0622348	0
Ccna2	2.33511	0.259737	0.0514748	0.2252	0.0401995	0
Aurka	2.32751	0.178717	0.0356053	0.189662	0.0353607	0
Uhrf1	2.32576	0.144903	0.0289037	0.186431	0.0320107	0
Cdca2	2.32408	0.150143	0.029984	0.173508	0.0307452	2.61755e-305
Prc1	2.3177	0.498774	0.100048	0.312809	0.0667759	0
Pbld1	2.31049	0.251621	0.0507249	0.310908	0.0561304	0
Ttk	2.30223	0.105183	0.0213257	0.144052	0.0258319	5.65684e-248
Cldn15	2.2997	0.0992869	0.0201658	0.123907	0.0241197	4.3267e-201
Tm4sf1	2.29622	3.10631	0.632432	0.995059	0.52237	0
Ccnb2	2.29136	0.338265	0.0691018	0.255036	0.0471972	0
Mybl1	2.28733	0.21374	0.0437853	0.276606	0.051366	0
Pclaf	2.28424	0.476998	0.0979245	0.278696	0.0530782	0
Rrm2	2.28164	0.488535	0.100474	0.385215	0.0908956	0
Mfsd6	2.28097	0.151637	0.0312006	0.201824	0.038934	0
Depdc1a	2.27546	0.124091	0.0256306	0.148803	0.0245664	7.70468e-268
Esco2	2.26647	0.177575	0.0369069	0.170277	0.0308196	4.50665e-295
Prr11	2.25501	0.0914648	0.0191614	0.127328	0.0233753	8.03967e-214
Aif1l	2.25026	0.389551	0.081878	0.464652	0.0987866	0
Eml5	2.24989	0.229254	0.0481985	0.280312	0.0531527	0
Prrg4	2.2475	0.108943	0.0229421	0.151273	0.0273952	4.13066e-258
Cd80	2.24646	0.261719	0.0551549	0.355283	0.0645425	0
Kif20a	2.2457	0.232689	0.0490628	0.225295	0.0430284	0
Sgo2a	2.24113	0.227067	0.0480294	0.214747	0.0453361	0
Kifc1	2.23176	0.189056	0.0402498	0.242208	0.0451128	0
Iqgap2	2.23173	0.123132	0.0262152	0.167807	0.029703	1.52642e-291
Ddias	2.22077	0.214225	0.0459568	0.284398	0.0554604	0
Cdc20	2.21873	0.356038	0.076488	0.288864	0.0647659	0
Mis18bp1	2.20264	0.139146	0.0302282	0.163341	0.0316385	5.78909e-270
Cenpa	2.19501	0.469203	0.10247	0.326112	0.0782402	0
Slc25a37	2.19415	0.629044	0.13746	0.667807	0.161915	0
Kif15	2.19383	0.133169	0.0291068	0.155074	0.0291819	1.7377e-259
Igsf9b	2.18681	0.171078	0.0375751	0.235842	0.0457083	0
Dnph1	2.17399	0.100978	0.0223764	0.156784	0.0281397	4.06504e-268
Pimreg	2.17189	0.180337	0.0400204	0.191467	0.0393806	0
Ncaph	2.16403	0.156506	0.0349215	0.193938	0.038264	0
Diaph3	2.15844	0.340463	0.0762633	0.339605	0.0750391	0
Knstrn	2.15296	0.248564	0.0558897	0.239358	0.0511427	0
Gldn	2.1515	0.58279	0.131173	0.411155	0.126554	0
Melk	2.14576	0.139695	0.0315677	0.166857	0.0332763	7.96723e-271
Itgb4	2.1392	0.202469	0.0459617	0.244299	0.055386	0
Ska1	2.13472	0.0949116	0.0216125	0.127803	0.0227797	1.42317e-217
Cdca3	2.13283	0.354129	0.0807451	0.267484	0.0597037	0
Shcbp1	2.13174	0.136132	0.0310627	0.163626	0.0319363	3.05295e-268
Nav3	2.12926	0.249376	0.0570011	0.317655	0.0652125	0
Fez1	2.12028	1.0015	0.230347	0.803022	0.237922	0
Tes	2.11994	0.56461	0.129892	0.607564	0.142187	0
Slc16a1	2.11569	1.3177	0.304041	0.86336	0.302762	0
Tpx2	2.11064	0.45974	0.10645	0.314519	0.0806968	0
Sgo1	2.10957	0.155685	0.0360747	0.174268	0.0364773	6.15092e-275
Aurkb	2.10142	0.183932	0.0428614	0.193177	0.0415395	1.56703e-302
Abcb1b	2.09473	0.379842	0.0889253	0.47881	0.10906	0
Epha2	2.08336	0.162633	0.0383756	0.242588	0.0475694	0
Spdl1	2.08103	0.166081	0.0392525	0.20268	0.0434006	0
Ckap2	2.08	0.510325	0.120699	0.403459	0.102062	0
Klk8	2.07458	0.0871274	0.0206845	0.0973014	0.0231519	8.74823e-135
Foxl1	2.06736	0.148324	0.0353895	0.219688	0.0460805	0
Cystm1	2.06537	0.243939	0.0582831	0.307488	0.0723591	0
Mthfd1l	2.06494	0.184556	0.044108	0.27385	0.0550882	0
Gch1	2.05734	0.428982	0.103066	0.487172	0.12246	0
Ank	2.04997	1.04027	0.251215	0.801311	0.272017	0
Tk1	2.04757	0.318326	0.0770003	0.261878	0.0657336	0
Ccne2	2.04264	0.0824417	0.0200102	0.0932155	0.0202486	3.47225e-138
Met	2.04088	0.128845	0.0313113	0.195268	0.0393806	0
Mcm5	2.03727	0.208552	0.0508081	0.247054	0.0552371	0
Ckap2l	2.03377	0.218262	0.0533032	0.20401	0.0425073	0
Lmo2	2.03351	0.110592	0.0270132	0.131034	0.0302241	1.77064e-187
Cenph	2.03329	0.191842	0.0468664	0.22824	0.0500261	0
Cyp2f2	2.03077	0.368572	0.0901985	0.271475	0.078389	0
Plcg2	2.02903	0.105193	0.0257745	0.157545	0.0320852	4.36957e-248
Dusp10	2.02701	0.153043	0.037551	0.217123	0.0453361	0
Kif20b	2.02676	0.223611	0.0548754	0.208096	0.051366	5.30877e-298
Brca1	2.02655	0.0874009	0.0214517	0.126378	0.0257575	6.89043e-197
Ptprn	2.01919	0.498003	0.122856	0.548651	0.141219	0
Inka2	2.01659	0.380538	0.0940471	0.476815	0.108166	0
Rbm47	2.0116	0.09345	0.0231755	0.153554	0.0296285	1.63905e-248
Rsad2	2.0064	0.0694881	0.0172951	0.0558723	0.0179409	2.57863e-57
Osbpl3	2.00122	0.266328	0.0665256	0.363075	0.0805479	0
Pdzd2	1.99315	0.133951	0.0336472	0.195553	0.0417628	1.87968e-301
Aqp1	1.99215	0.93241	0.234374	0.673793	0.208889	0
Map3k6	1.99037	0.110239	0.0277443	0.169042	0.0352862	3.13293e-262
Ptchd4	1.98785	0.0789276	0.0198989	0.114405	0.0247897	6.32439e-170
Spred2	1.98164	0.336208	0.0851285	0.451159	0.100648	0
Flrt1	1.98049	0.277992	0.070444	0.354618	0.0794313	0
Ereg	1.96803	0.68643	0.175453	0.63512	0.175761	0
Cdca8	1.96454	0.347878	0.0891336	0.301216	0.0841212	0
Lockd	1.96135	0.17999	0.0462192	0.190517	0.044145	1.44922e-279
Klf10	1.95958	0.194592	0.0500301	0.280977	0.0588848	0
Foxm1	1.95682	0.109569	0.0282244	0.152319	0.034244	1.66564e-223
Ptk2b	1.95616	0.195444	0.0503685	0.282307	0.0604482	0
Arhgap11a	1.94671	0.230687	0.0598421	0.265868	0.0664036	0
Ptgs1	1.94472	0.668326	0.173608	0.639871	0.185737	0
Cx3cl1	1.94325	0.311523	0.0810054	0.387115	0.0921611	0
Cenpu	1.94317	0.0949558	0.0246927	0.142626	0.0305963	6.53919e-215
Tspan15	1.94302	0.21865	0.0568647	0.239073	0.069158	8.17601e-303
Lrp8	1.94224	0.24117	0.0627554	0.337799	0.0757835	0
Gas2l3	1.94203	0.129124	0.0336045	0.142721	0.0347651	2.74866e-197
Rapgef3	1.93997	0.0995371	0.0259415	0.157545	0.0328296	1.99289e-242
Trem2	1.93625	0.106076	0.0277172	0.135975	0.0325318	6.41788e-189
Trib2	1.93437	0.521531	0.136451	0.585519	0.15045	0
Ube2t	1.93098	0.145303	0.0381058	0.191277	0.0422095	4.69696e-288
Spc25	1.93098	0.42362	0.111095	0.380179	0.100722	0
Gen1	1.92914	0.10134	0.0266103	0.137495	0.0314896	9.59605e-198
Stn1	1.92887	0.7598	0.19955	0.719403	0.225713	0
Trip13	1.92735	0.119802	0.0314972	0.166097	0.0364773	4.57986e-248
Ccdc3	1.92721	0.331193	0.0870826	0.348822	0.0932777	0
Fjx1	1.92057	0.261109	0.0689718	0.322216	0.0774957	0
Chic1	1.91647	0.530931	0.140644	0.552452	0.162361	0
Dio2	1.91644	0.128794	0.0341185	0.15935	0.0359562	7.57293e-234
Cyb561	1.90946	0.259548	0.0690896	0.330863	0.0757091	0
C77080	1.90877	0.257031	0.0684521	0.361935	0.0850145	0
Hectd2	1.89499	0.109995	0.0295751	0.177024	0.0364773	1.91985e-274
Il16	1.89165	0.302046	0.081401	0.370296	0.0882156	0
Rgmb	1.89038	0.784717	0.211667	0.740118	0.235316	0
Klf5	1.89007	0.389943	0.105204	0.457716	0.120822	0
Lipg	1.88933	0.199717	0.05391	0.231281	0.0640959	1.73212e-295
Tiam1	1.88795	0.167107	0.0451507	0.255321	0.0578426	0
Cdt1	1.8878	0.0974024	0.0263199	0.148233	0.0323829	3.90819e-220
Mastl	1.88547	0.16255	0.0439952	0.192037	0.0485372	2.24592e-262
Ulbp1	1.87954	0.112527	0.0305815	0.15935	0.0375195	4.79443e-225
Sytl1	1.86479	0.398874	0.109516	0.446123	0.118663	0
Pttg1	1.86307	0.410376	0.112809	0.335804	0.10102	0
Fam111a	1.85609	0.874409	0.241533	0.737172	0.242388	0
Pmaip1	1.85113	0.100025	0.0277244	0.125713	0.0302241	5.62121e-173
Perp	1.84172	0.378942	0.105721	0.335614	0.100573	0
Rad51	1.83915	0.175866	0.0491522	0.207811	0.0535993	1.16277e-280
Racgap1	1.83626	0.239799	0.067155	0.244869	0.0655848	0
Cdc25b	1.83271	0.215029	0.0603666	0.276321	0.0713169	0
Inf2	1.83002	1.13857	0.320235	0.905074	0.339463	0
Mfap3l	1.82522	0.20764	0.0585956	0.285443	0.0713913	0
Top2a	1.82164	0.578934	0.16378	0.356899	0.124395	0
Cenpm	1.81978	0.256577	0.0726789	0.244964	0.061267	0
Ermp1	1.8152	0.794319	0.225717	0.747815	0.240378	0
Eda2r	1.81161	0.309106	0.0880559	0.404314	0.102509	0
Rad51ap1	1.81099	0.130465	0.037182	0.162581	0.037594	7.08507e-233
Gmnn	1.81083	0.339024	0.0966308	0.357564	0.0999777	0
Zwilch	1.81018	0.111527	0.0318026	0.162296	0.0387106	8.66848e-226
Tor4a	1.80768	0.160355	0.0458054	0.249715	0.0562793	0
Ccnd1	1.80238	3.32627	0.953649	0.995914	0.65555	0
Cenpn	1.79957	0.11647	0.0334572	0.166857	0.040274	7.86192e-231
Brip1	1.7921	0.0864433	0.0249605	0.120582	0.0285119	6.171e-167
Kif22	1.7921	0.191392	0.0552649	0.236697	0.0617881	0
Tpd52	1.79175	0.337587	0.0975022	0.429114	0.11911	0
Gask1b	1.79043	0.442576	0.127943	0.503991	0.139061	0
Mxd3	1.7846	0.0978506	0.0284017	0.125048	0.0281397	2.69774e-180
Raph1	1.77397	0.617125	0.180449	0.629418	0.200476	0
Sgms1	1.77126	0.401884	0.117733	0.503231	0.137497	0
Cd34	1.76475	1.06581	0.313645	0.72596	0.249758	0
Tmem47	1.75702	0.616634	0.182436	0.621342	0.201519	0
Pole	1.74844	0.100792	0.0299982	0.152794	0.0372218	2.78118e-207
Mcub	1.73857	0.616739	0.184817	0.647377	0.210005	0
Dlgap1	1.73277	0.0870054	0.0261777	0.126188	0.030373	2.81705e-171
Fignl1	1.72346	0.100641	0.0304761	0.143672	0.0360307	6.93657e-190
Fbxo5	1.71068	0.1587	0.0484853	0.165146	0.0444428	3.7482e-209
Kif18a	1.70667	0.101768	0.0311784	0.144622	0.0373707	3.96354e-186
Schip1	1.70647	0.085344	0.0261501	0.13664	0.0323829	9.40777e-188
Nceh1	1.70464	0.624959	0.191736	0.639491	0.208814	0
Slc20a2	1.70136	0.475865	0.146327	0.562334	0.171295	0
Ncapd2	1.70081	0.133261	0.040993	0.177309	0.0463039	1.62786e-229
Mbnl3	1.69958	0.189112	0.0582229	0.259882	0.0695303	0
Tacc3	1.69852	0.278516	0.0858112	0.284493	0.0865034	0
Dok1	1.69272	0.676398	0.20924	0.681965	0.231147	0
Pi16	1.68796	0.546556	0.169632	0.434721	0.14777	0
Arap2	1.6816	0.204069	0.063616	0.272615	0.0748902	0
Tnfrsf12a	1.67864	1.39149	0.434667	0.88436	0.393881	0
Arl4c	1.6767	0.429045	0.134204	0.490783	0.155661	0
Stom	1.67649	0.616647	0.192914	0.661441	0.214323	0
Cd44	1.67382	1.12683	0.353176	0.879894	0.343706	0
Pakap	1.67206	1.12783	0.35392	0.876948	0.352192	0
Morrbid	1.66568	0.0840441	0.0264904	0.131319	0.0331274	4.4201e-171
Gss	1.66402	1.07679	0.33979	0.871912	0.358073	0
Gdf15	1.66309	0.226165	0.071414	0.217503	0.0701258	6.62987e-233
Ercc1	1.65698	2.1211	0.672605	0.979571	0.596814	0
Rassf3	1.65375	0.278434	0.0884902	0.380369	0.104519	0
Clspn	1.65133	0.188895	0.0601338	0.193177	0.057396	9.91345e-226
Bmp2	1.64004	0.410619	0.131746	0.367636	0.136306	0
Egr3	1.6389	0.123029	0.0395049	0.170087	0.0409439	7.26224e-233
Sema4b	1.63543	0.196519	0.0632542	0.288198	0.0764535	0
Chtf18	1.63019	0.088035	0.0284394	0.133219	0.036254	9.12488e-163
Vldlr	1.62415	0.546341	0.177234	0.586089	0.190278	0
Ubtd1	1.62381	0.846919	0.274805	0.815564	0.296583	0
Samd12	1.62291	0.153882	0.0499624	0.20458	0.0573215	3.11327e-249
Mgat5	1.61836	0.492923	0.160547	0.579628	0.187523	0
Ripk3	1.61806	0.668607	0.217814	0.699639	0.241718	0
Cip2a	1.60912	0.156962	0.0514518	0.200114	0.0577682	5.52596e-237
Rem1	1.60464	0.234506	0.0771098	0.303497	0.0911189	0
Gk	1.60372	0.140639	0.046274	0.216268	0.057396	5.63491e-275
Il6ra	1.60368	0.234991	0.0773204	0.313379	0.0882156	0
Kpna2	1.60347	0.210445	0.0692541	0.27309	0.0804735	0
Fam181b	1.59932	0.11401	0.0376271	0.148233	0.0429539	2.25104e-171
Spc24	1.58901	0.268507	0.0892516	0.256081	0.0778679	3.39531e-302
Mapk13	1.58679	1.38142	0.45989	0.898043	0.451351	0
Slc43a2	1.58375	0.188931	0.0630298	0.271	0.0779424	0
Nqo1	1.58005	0.32163	0.107576	0.394147	0.126926	0
Orai2	1.57998	0.291369	0.0974592	0.410775	0.114271	0
Hbegf	1.57798	0.621451	0.208155	0.511688	0.186779	0
Zfp365	1.57645	0.255522	0.0856778	0.345211	0.101839	0
Odc1	1.57629	1.37265	0.460309	0.859749	0.444428	0
S100a3	1.5753	0.0802974	0.0269456	0.128943	0.032904	5.22437e-165
Cdkn3	1.57314	0.227719	0.0765309	0.217503	0.0728058	2.59814e-227
Mdm2	1.56908	1.70797	0.575627	0.944223	0.517085	0
Pcgf5	1.56835	0.196389	0.066221	0.288769	0.0786124	0
Pla2g7	1.56644	0.398844	0.134666	0.397567	0.140177	0
Aox1	1.56523	0.159644	0.0539474	0.231946	0.0650636	1.03755e-280
Trim7	1.55853	0.306582	0.104084	0.372102	0.112782	0
Baiap2l1	1.55733	0.0873924	0.0296941	0.132459	0.0377429	1.40077e-153
Kank3	1.54993	0.214452	0.0732412	0.290099	0.0881411	0
Slc19a2	1.54405	0.243617	0.0835415	0.344356	0.0985632	0
Bcl2l1	1.54236	0.853856	0.293149	0.806157	0.316981	0
Clcf1	1.53694	0.189454	0.0652887	0.274135	0.078389	0
Gdf6	1.53119	0.0938171	0.03246	0.108609	0.0358073	8.82905e-108
Ass1	1.53063	1.72785	0.598055	0.940707	0.470632	0
Raet1e	1.5303	0.227849	0.0788824	0.308628	0.0945433	0
Osbpl6	1.52971	0.183619	0.0635962	0.253326	0.075858	4.52191e-290
Wnt10a	1.51766	0.180135	0.0629126	0.198974	0.0697536	1.06518e-192
Rbpj	1.51714	1.82105	0.636235	0.972159	0.566813	0
Eps8	1.51512	1.50226	0.525592	0.947073	0.46624	0
Rai14	1.51252	0.907577	0.318105	0.779932	0.334103	0
Cplx2	1.51191	0.11955	0.0419199	0.172083	0.0492072	2.5164e-200
Pxn	1.50722	0.661177	0.232594	0.698879	0.259212	0
Cldn11	1.50584	0.132729	0.0467372	0.124192	0.0390829	2.38585e-130
Atp6v0e2	1.50578	0.0843714	0.0297105	0.131509	0.0352862	1.43505e-160
Itpr3	1.50565	0.323743	0.114013	0.438807	0.137274	0
Smox	1.50235	0.670413	0.236641	0.663246	0.256979	0

## Sheet: Down-regulated
gene	log2FC	Ave_FGF2	Ave_BSA	FGF2 (%)	BSA (%)	Adjusted P value
Megf6	-6.02006	0.00848258	0.550486	0.0111174	0.449043	0
Lypd1	-5.87317	0.00233288	0.136739	0.00399088	0.114792	1.01891e-257
Gucy1a1	-5.40917	0.00346285	0.147148	0.0040859	0.115685	6.13591e-259
Aspn	-5.2144	0.0214252	0.795455	0.0321171	0.501898	0
Olfml1	-4.6287	0.012061	0.298372	0.0173888	0.300082	0
Rspo2	-4.46216	0.0267491	0.589593	0.0412391	0.459465	0
Prss35	-4.41692	0.0113454	0.242351	0.0189092	0.221544	0
Prlr	-4.31294	0.00950919	0.189003	0.0140631	0.168168	0
Nrep	-4.30389	0.0389414	0.769151	0.0514063	0.578798	0
Ldb2	-4.29404	0.0278186	0.545722	0.0406689	0.433634	0
Pappa	-4.27174	0.0609015	1.17639	0.0752566	0.729993	0
Nckap5	-4.00773	0.0103258	0.1661	0.0178639	0.177101	0
Vipr2	-3.99487	0.0112532	0.179411	0.0184341	0.17591	0
Hmcn1	-3.97072	0.0657453	1.03079	0.0905549	0.672002	0
Chodl	-3.93696	0.0111058	0.170095	0.0138731	0.101467	9.14648e-172
Cmbl	-3.91383	0.0178113	0.268457	0.0297415	0.254671	0
Igf1	-3.85651	0.0699652	1.01346	0.0846636	0.593017	0
Aff3	-3.75611	0.00964646	0.130337	0.0167237	0.141592	5.6562e-260
Igfbp5	-3.70851	0.130775	1.70961	0.104713	0.69292	0
Gdf10	-3.7056	0.0331507	0.432504	0.0375333	0.30574	0
Fibin	-3.62955	0.0123174	0.152448	0.0177689	0.136753	1.6151e-241
Clec3b	-3.62373	0.102853	1.26785	0.125903	0.636194	0
Rgs4	-3.49785	0.0145939	0.164865	0.0201444	0.140624	2.74707e-240
Ggt5	-3.47113	0.0767193	0.850786	0.110034	0.620412	0
Gdpd2	-3.44879	0.0312234	0.340932	0.04542	0.293829	0
Adamtsl1	-3.41147	0.0269818	0.287095	0.0400038	0.257202	0
Susd2	-3.36787	0.0443122	0.457459	0.0679399	0.372813	0
Omd	-3.33572	0.020545	0.207424	0.0345876	0.207772	0
Ptx3	-3.3338	0.148053	1.49277	0.157165	0.769374	0
Me3	-3.28964	0.0153055	0.149667	0.0266059	0.173007	6.88086e-295
St8sia2	-3.27131	0.0179236	0.173056	0.0279361	0.172411	3.93074e-287
Reps2	-3.23227	0.0200748	0.188652	0.0308818	0.193777	0
Eya4	-3.22251	0.019738	0.184237	0.0335424	0.187151	1.39177e-303
Slc24a3	-3.21882	0.0403898	0.37604	0.0689852	0.375791	0
Fmod	-3.14524	0.016529	0.146237	0.0264158	0.134073	6.767e-197
Hpgd	-3.14401	0.0947336	0.837425	0.0930255	0.50495	0
Adam12	-3.11225	0.0172552	0.149211	0.0260357	0.153279	1.47911e-245
Nid2	-3.10833	0.0623357	0.537572	0.0968263	0.482022	0
Mfap4	-3.08624	0.148615	1.26216	0.169327	0.645723	0
Pth1r	-3.07489	0.019498	0.164294	0.0258457	0.162659	7.43435e-268
Adh1	-3.0561	0.0203414	0.169185	0.0277461	0.152833	1.14461e-236
Slc40a1	-3.04106	0.0399268	0.328636	0.050076	0.262637	0
Htra3	-3.02773	0.1007	0.821231	0.145667	0.643862	0
Col11a1	-2.97042	0.136709	1.07148	0.168757	0.669396	0
Lrrc17	-2.94844	0.0958207	0.739652	0.120011	0.552445	0
Ddx4	-2.94573	0.0245191	0.188911	0.0309768	0.150153	5.69678e-216
Foxp2	-2.83902	0.0184415	0.131954	0.0300266	0.144123	1.53975e-205
Galnt9	-2.82368	0.117463	0.831603	0.143387	0.588104	0
Ptn	-2.80505	0.145155	1.01446	0.126853	0.411822	0
Cxcl15	-2.79937	0.0907058	0.631438	0.111745	0.44212	0
Sfrp2	-2.7739	0.217234	1.48578	0.230331	0.720837	0
Sbspon	-2.75042	0.0406977	0.273861	0.0572026	0.24142	0
Lpl	-2.74393	0.188229	1.26093	0.161631	0.553413	0
Bend5	-2.7344	0.0206226	0.13724	0.0310718	0.125512	2.43712e-158
Fmo1	-2.73059	0.0194508	0.1291	0.0315469	0.130351	1.12127e-167
Parm1	-2.69013	0.0593516	0.383039	0.0814329	0.327328	0
Eln	-2.67916	0.069448	0.444801	0.0747815	0.304623	0
Wnt16	-2.64515	0.114343	0.715282	0.144147	0.533165	0
Cdkn1c	-2.63441	0.273269	1.69679	0.280217	0.7792	0
Smoc1	-2.60658	0.0223732	0.136266	0.0333523	0.116504	3.99763e-129
Adamts9	-2.60233	0.0572936	0.347924	0.077347	0.315715	0
Limch1	-2.58829	0.0237116	0.142598	0.0371532	0.140847	1.16573e-170
Mex3b	-2.57233	0.030181	0.179507	0.0430445	0.182163	2.50445e-247
Epha3	-2.54771	0.0332639	0.194495	0.0451349	0.186704	4.87019e-250
Prss23	-2.53256	0.362759	2.09892	0.393387	0.911189	0
Ogn	-2.52643	0.44783	2.58015	0.436146	0.938956	0
Hspb2	-2.50269	0.0308406	0.174786	0.0460851	0.17926	8.02605e-230
Ptprd	-2.48963	0.0950439	0.533799	0.143957	0.44882	0
Slc1a3	-2.46656	0.085156	0.470679	0.102813	0.385915	0
Slc1a6	-2.46508	0.035982	0.198677	0.0510262	0.193925	6.05872e-247
Dnajb3	-2.46016	0.0213315	0.117382	0.0381034	0.134892	9.89854e-155
Rspo3	-2.44744	0.212973	1.16166	0.263018	0.72508	0
Ramp1	-2.44337	0.0216919	0.117985	0.0309768	0.107124	1.23819e-115
Bdh2	-2.44043	0.0331459	0.179916	0.0536868	0.191245	6.55596e-234
Dact1	-2.42539	0.0788576	0.423604	0.107279	0.391275	0
Arhgap20	-2.40336	0.111908	0.592032	0.156499	0.483287	0
Kera	-2.39016	0.0318954	0.167201	0.0354428	0.126628	5.73093e-142
Lgalsl	-2.37689	0.121207	0.629568	0.185576	0.533165	0
Fbxl7	-2.35	0.123159	0.627896	0.186621	0.494231	0
Myl9	-2.34419	0.10103	0.513008	0.112315	0.353011	0
Col27a1	-2.33356	0.0521047	0.262632	0.0719308	0.260031	0
Tgfb2	-2.32255	0.189427	0.947547	0.220258	0.62138	0
Cybrd1	-2.32251	0.0222632	0.111361	0.0366781	0.115834	7.96427e-117
Ncam2	-2.31879	0.019395	0.0967641	0.0310718	0.0940222	9.78341e-89
Plcxd2	-2.31426	0.032624	0.162256	0.0519764	0.17256	6.85383e-194
Fxyd1	-2.30596	0.279341	1.38134	0.307678	0.751061	0
Ism1	-2.29433	0.0418967	0.205514	0.0613835	0.208665	7.09768e-247
Gas2	-2.27631	0.402725	1.95095	0.452109	0.942306	0
Pcsk5	-2.26502	0.0742388	0.356838	0.103003	0.306707	0
Porcn	-2.2567	0.0644269	0.307895	0.100722	0.311472	0
Steap4	-2.23543	0.188424	0.887297	0.205435	0.629569	0
Gulp1	-2.20602	0.181827	0.83895	0.263208	0.6889	0
Tenm3	-2.18036	0.0916262	0.415311	0.120962	0.394253	0
Tbxa2r	-2.16831	0.065876	0.29611	0.0930255	0.266285	3.32841e-293
Ecrg4	-2.16109	0.193813	0.866836	0.244109	0.582148	0
Cd24a	-2.1607	0.112478	0.502928	0.139396	0.386213	0
Fndc1	-2.15527	0.141804	0.631671	0.17978	0.452021	0
Fat4	-2.15387	0.164046	0.73004	0.222824	0.60999	0
Ppp1r3b	-2.15047	0.0430377	0.191076	0.0627138	0.186407	4.92795e-191
Armh4	-2.14118	0.0543846	0.239903	0.0823831	0.239336	9.63354e-256
Nkd1	-2.13737	0.022869	0.100614	0.0339225	0.108613	8.21138e-109
Adamts15	-2.13688	0.0273645	0.120351	0.0338274	0.112931	2.65515e-117
Egfl6	-2.13127	0.161673	0.708291	0.13721	0.336485	0
Smarca1	-2.11996	0.0856144	0.372151	0.121817	0.34713	0
Bcl11a	-2.11788	0.0348229	0.151151	0.0458001	0.155066	4.68411e-169
Fbn2	-2.11623	0.132623	0.574998	0.162866	0.441822	0
Tnik	-2.11145	0.0239804	0.103625	0.0314519	0.0969255	2.67197e-92
Cys1	-2.11055	0.0365816	0.15798	0.0575827	0.173975	8.42469e-178
Matn4	-2.10898	0.0447937	0.193233	0.0571076	0.157299	7.02775e-141
Svep1	-2.09649	0.489096	2.09171	0.530217	0.963299	0
Fgl2	-2.09648	0.153585	0.656827	0.175504	0.462815	0
Epha4	-2.07461	0.115831	0.487913	0.152604	0.425817	0
Fbln7	-2.06807	0.278857	1.16932	0.326207	0.733045	0
Plagl1	-2.06373	0.161971	0.677148	0.206765	0.539716	0
Rnf144a	-2.06254	0.0571829	0.238865	0.081718	0.245887	5.67181e-271
Cttnbp2	-2.04647	0.108635	0.448766	0.130369	0.395965	0
Zfp521	-2.04223	0.142394	0.586498	0.213037	0.543289	0
Ppfibp2	-2.01573	0.0293211	0.11857	0.0473204	0.133328	2.77307e-120
Lbp	-1.98976	0.137707	0.54693	0.169137	0.423286	0
Srpx	-1.97525	0.158076	0.621549	0.211802	0.518053	0
Pdgfrl	-1.96935	0.317165	1.24199	0.404884	0.824313	0
Wnt5b	-1.96221	0.0521843	0.20334	0.0821931	0.209931	1.84911e-188
Rab30	-1.94954	0.0836129	0.322956	0.129704	0.336931	0
Acvr2a	-1.93376	0.0967217	0.369525	0.152984	0.366486	0
Vstm4	-1.93308	0.0580707	0.221754	0.0793425	0.228467	2.80881e-232
Tcerg1l	-1.93096	0.0221707	0.0845391	0.027271	0.0780913	1.00193e-66
Ypel1	-1.91637	0.0248764	0.0939014	0.040764	0.107794	2.10561e-87
Ankrd55	-1.91021	0.0430265	0.161721	0.0723109	0.164967	3.94302e-120
Mylk	-1.90942	0.0561123	0.21079	0.0744964	0.182908	1.8611e-148
Fgfr2	-1.90329	0.117754	0.440476	0.18092	0.41599	0
Acot2	-1.89142	0.048057	0.178291	0.0775371	0.183652	4.92847e-144
Tent5a	-1.8885	0.233073	0.862952	0.278601	0.634557	0
Plekhf1	-1.88457	0.0902032	0.333069	0.148898	0.348619	0
Nedd9	-1.88139	0.0902798	0.332618	0.138635	0.334847	0
Epha5	-1.87782	0.0460275	0.16916	0.063474	0.153354	2.27422e-116
Col12a1	-1.87246	0.392685	1.43784	0.416952	0.811583	0
Sorcs2	-1.86621	0.0294994	0.107547	0.0423793	0.117249	5.4654e-100
Apba2	-1.86553	0.0207048	0.0754486	0.0297415	0.0777191	1.82321e-59
Fzd4	-1.86194	0.0450515	0.163761	0.0699354	0.169508	4.53772e-133
Tnmd	-1.86121	0.028082	0.102025	0.0336374	0.0806968	1.11453e-54
Unc5c	-1.85601	0.0807847	0.292444	0.125618	0.293456	1.93509e-267
Pygo1	-1.84076	0.0526108	0.18845	0.0859939	0.209484	5.57943e-176
Nuak1	-1.83801	0.0435502	0.155699	0.0698404	0.173007	3.04865e-140
Ccdc80	-1.83052	0.633075	2.25163	0.588179	0.966426	0
Otulinl	-1.82852	0.045538	0.161739	0.0738312	0.174347	2.71856e-134
Gadd45b	-1.82571	0.132953	0.471295	0.192132	0.443386	0
Trib3	-1.82516	0.0291387	0.103252	0.0496959	0.0997543	4.56596e-53
Phactr1	-1.82234	0.0995037	0.351899	0.145287	0.351299	0
Cadm2	-1.82101	0.0286941	0.101384	0.0425694	0.112038	1.24173e-89
Klhl13	-1.80613	0.128865	0.450645	0.193463	0.410556	0
G0s2	-1.80297	0.0687567	0.239918	0.0915051	0.224373	2.64584e-189
Robo2	-1.79911	0.0896585	0.312017	0.122482	0.298519	3.69769e-277
Tceal3	-1.79	0.0255083	0.0882117	0.0391486	0.0920867	4.16204e-62
Mmp11	-1.78748	0.108627	0.374993	0.162581	0.348991	0
Maml2	-1.78437	0.0738388	0.254351	0.114785	0.270081	2.17133e-236
Cdon	-1.78262	0.186051	0.640106	0.245154	0.557061	0
Fhl1	-1.77324	0.0364674	0.124653	0.0515013	0.123278	1.85033e-88
Rasl11a	-1.77233	0.16917	0.577893	0.179209	0.440408	0
Cnn1	-1.77065	0.0117012	0.0399253	0.0109274	0.0273952	1.74665e-19
Ripor3	-1.76925	0.0711071	0.242387	0.11298	0.247525	3.01677e-193
Dipk2a	-1.75979	0.153095	0.518453	0.224154	0.460657	0
Galnt13	-1.75718	0.12204	0.41254	0.184626	0.364476	1.37685e-307
Abi3bp	-1.75597	0.486054	1.64166	0.463892	0.832502	0
Slc9a9	-1.75139	0.0496925	0.167306	0.0755416	0.18328	1.34832e-145
Islr	-1.74808	0.246967	0.829591	0.318795	0.66426	0
Sox6	-1.73914	0.0256412	0.0855999	0.0419992	0.0964044	3.89637e-63
Nhsl1	-1.7375	0.0328377	0.1095	0.0558723	0.122385	1.11816e-77
Id4	-1.72521	0.0510955	0.168936	0.0709806	0.160798	2.15083e-111
Plscr2	-1.70945	0.125771	0.411315	0.163436	0.372367	0
Phyhd1	-1.70819	0.136532	0.446117	0.212087	0.420904	0
Lmcd1	-1.70223	0.13673	0.444924	0.164481	0.374898	0
Ophn1	-1.69448	0.147421	0.477144	0.218928	0.45217	0
Dpep1	-1.69138	0.216375	0.698819	0.266249	0.499888	0
Shroom3	-1.68279	0.0507144	0.162817	0.0784873	0.178739	1.60057e-128
Podn	-1.66854	0.118777	0.377583	0.176074	0.352118	2.22205e-287
Gadd45g	-1.66742	0.284287	0.903027	0.331243	0.646095	0
Creb3l1	-1.66385	0.257965	0.81739	0.348347	0.664706	0
Mia	-1.66337	0.10109	0.320208	0.103288	0.199955	7.52973e-109
Prelp	-1.65847	0.155223	0.49001	0.182725	0.375865	0
Ccdc30	-1.64977	0.0447687	0.140477	0.0717408	0.159756	2.50101e-108
Smpdl3a	-1.64701	0.200208	0.627018	0.280312	0.544257	0
Hpse2	-1.62939	0.0300323	0.0929144	0.0438046	0.0991588	8.92113e-63
Aldh1l2	-1.62783	0.073517	0.227202	0.1145	0.222363	4.36949e-136
Agtr1a	-1.62208	0.0788192	0.24262	0.109084	0.221544	2.66893e-142
Tmeff1	-1.62096	0.0366296	0.112665	0.0576777	0.131393	2.60327e-87
Sema3d	-1.61805	0.088355	0.271214	0.120296	0.240378	3.14898e-156
Rbp4	-1.61776	0.0964779	0.296088	0.133314	0.230924	1.01433e-111
Dleu2	-1.61222	0.206556	0.631488	0.260642	0.498623	0
Tmem26	-1.60983	0.0925156	0.282372	0.11583	0.256235	2.31682e-193
Cdc42ep3	-1.60902	0.213033	0.649844	0.258077	0.471153	0
Thsd7a	-1.60565	0.146792	0.446736	0.20363	0.391945	0
Gstt1	-1.60454	0.227627	0.692211	0.281642	0.559592	0
Dipk1a	-1.58761	0.192832	0.579558	0.265298	0.497878	0
Tnn	-1.57275	0.0988056	0.293918	0.0973964	0.204794	6.97894e-128
Lrig3	-1.56279	0.363148	1.07283	0.455245	0.763791	0
Prr16	-1.56252	0.198711	0.58693	0.271095	0.532122	0
Mest	-1.55182	0.158234	0.46392	0.154599	0.319586	4.40267e-231
Dlc1	-1.54866	0.207331	0.606537	0.293805	0.538152	0
Ddr1	-1.54022	0.114143	0.331971	0.179114	0.344525	4.20444e-261
Podxl2	-1.53443	0.239732	0.69444	0.338464	0.594134	0
Cpxm1	-1.53065	0.353575	1.02153	0.36526	0.693367	0
Ramp2	-1.52533	0.130053	0.374363	0.170372	0.333135	4.48185e-240
Cxcl12	-1.52347	1.18384	3.40333	0.79352	0.994938	0
Dtx4	-1.52307	0.0282499	0.0811906	0.0486507	0.0964044	1.45994e-48
Spon1	-1.51947	0.0581842	0.166806	0.0691752	0.143676	1.66422e-82
Il1r2	-1.51441	0.034028	0.0972118	0.0494109	0.105114	3.90429e-60
Tox	-1.51415	0.0491944	0.140514	0.0721209	0.150525	2.72824e-89
Cthrc1	-1.5139	0.102937	0.293968	0.130939	0.231743	6.42905e-115
Pdgfd	-1.50323	0.0857071	0.24296	0.124667	0.238443	4.02941e-143
Pdk1	-1.50243	0.0289121	0.0819138	0.0492208	0.0970744	1.56366e-48
